# Supplementary material for: Sulfonium ions as inhibitors of the mycobacterial galactofuranosyltransferase GlfT2
Source: Royal Society of Chemistry journal article supplement (doi:10.1039/c4md00067f), 2014-01-01
Supplement: c4md00067f1.pdf [file c4md00067f1.pdf]

Supporting Information for:

**Sulfonium Ions as Inhibitors of the Mycobacterial  
Galactofuranosyltransferase GlfT2**

Jing Li and Todd L. Lowary\*

Alberta Glycomics Centre and Department of Chemistry,  
The University of Alberta, Gunning-Lemieux Chemistry Centre,  
Edmonton, AB T6G 2G2, Canada.

Email: [tlowary@ualberta.ca](mailto:tlowary@ualberta.ca)

---

**Table of Contents**

|                                                                                |       |
|--------------------------------------------------------------------------------|-------|
| Fig. S1                                                                        | S5    |
| Fig. S2                                                                        | S5    |
| Scheme S1                                                                      | S5    |
| Description of Preparation of Iodides                                          | S6    |
| Characterization Data for New Compounds and Additional<br>Experimental Details | S6–23 |
| References for Supporting Information                                          | S23   |
| <sup>1</sup> H NMR spectrum of <b>13</b>                                       | S24   |
| <sup>13</sup> C NMR spectrum (APT) of <b>13</b>                                | S25   |
| <sup>1</sup> H NMR spectrum of <b>14</b>                                       | S26   |
| <sup>13</sup> C NMR spectrum (APT) of <b>14</b>                                | S27   |
| <sup>1</sup> H NMR spectrum of <b>15</b>                                       | S28   |
| <sup>13</sup> C NMR spectrum (APT) of <b>15</b>                                | S29   |

|                                                 |     |
|-------------------------------------------------|-----|
| <sup>1</sup> H NMR spectrum of <b>16</b>        | S30 |
| <sup>13</sup> C NMR spectrum (APT) of <b>16</b> | S31 |
| <sup>1</sup> H NMR spectrum of <b>17</b>        | S32 |
| <sup>13</sup> C NMR spectrum (APT) of <b>17</b> | S33 |
| <sup>1</sup> H NMR spectrum of <b>18</b>        | S34 |
| <sup>13</sup> C NMR spectrum (APT) of <b>18</b> | S35 |
| <sup>1</sup> H NMR spectrum of <b>20</b>        | S36 |
| <sup>13</sup> C NMR spectrum (APT) of <b>20</b> | S37 |
| <sup>1</sup> H NMR spectrum of <b>21</b>        | S38 |
| <sup>13</sup> C NMR spectrum (APT) of <b>21</b> | S39 |
| <sup>1</sup> H NMR spectrum of <b>22</b>        | S40 |
| <sup>13</sup> C NMR spectrum (APT) of <b>22</b> | S41 |
| <sup>1</sup> H NMR spectrum of <b>25</b>        | S42 |
| <sup>13</sup> C NMR spectrum (APT) of <b>25</b> | S43 |
| <sup>1</sup> H NMR spectrum of <b>26</b>        | S44 |
| <sup>13</sup> C NMR spectrum (APT) of <b>26</b> | S45 |
| <sup>1</sup> H NMR spectrum of <b>27</b>        | S46 |
| <sup>13</sup> C NMR spectrum (APT) of <b>27</b> | S47 |
| <sup>1</sup> H NMR spectrum of <b>28</b>        | S48 |
| <sup>13</sup> C NMR spectrum (APT) of <b>28</b> | S49 |
| <sup>1</sup> H NMR spectrum of <b>29</b>        | S50 |
| <sup>13</sup> C NMR spectrum (APT) of <b>29</b> | S51 |
| <sup>1</sup> H NMR spectrum of <b>S6</b>        | S52 |
| <sup>13</sup> C NMR spectrum (APT) of <b>S6</b> | S53 |
| <sup>1</sup> H NMR spectrum of <b>42</b>        | S54 |
| <sup>13</sup> C NMR spectrum (APT) of <b>42</b> | S55 |

|                                                 |     |
|-------------------------------------------------|-----|
| <sup>1</sup> H NMR spectrum of <b>S7</b>        | S56 |
| <sup>13</sup> C NMR spectrum (APT) of <b>S7</b> | S57 |
| <sup>1</sup> H NMR spectrum of <b>43</b>        | S58 |
| <sup>13</sup> C NMR spectrum of <b>43</b>       | S59 |
| <sup>1</sup> H NMR spectrum of <b>S8</b>        | S60 |
| <sup>13</sup> C NMR spectrum of <b>S8</b>       | S61 |
| <sup>1</sup> H NMR spectrum of <b>44</b>        | S62 |
| <sup>13</sup> C NMR spectrum of <b>44</b>       | S63 |
| <sup>1</sup> H NMR spectrum of <b>46</b>        | S64 |
| <sup>13</sup> C NMR spectrum (APT) of <b>46</b> | S65 |
| <sup>1</sup> H NMR spectrum of <b>48</b>        | S66 |
| <sup>13</sup> C NMR spectrum (APT) of <b>48</b> | S67 |
| <sup>1</sup> H NMR spectrum of <b>50</b>        | S68 |
| <sup>13</sup> C NMR spectrum of <b>50</b>       | S69 |
| <sup>1</sup> H NMR spectrum of <b>52</b>        | S70 |
| <sup>13</sup> C NMR spectrum of <b>52</b>       | S71 |
| <sup>1</sup> H NMR spectrum of <b>54</b>        | S72 |
| <sup>13</sup> C NMR spectrum of <b>54</b>       | S73 |
| <sup>1</sup> H NMR spectrum of <b>56</b>        | S74 |
| <sup>13</sup> C NMR spectrum (APT) of <b>56</b> | S75 |
| <sup>1</sup> H NMR spectrum of <b>58</b>        | S76 |
| <sup>13</sup> C NMR spectrum (APT) of <b>58</b> | S77 |
| <sup>1</sup> H NMR spectrum of <b>60</b>        | S78 |
| <sup>13</sup> C NMR spectrum of <b>60</b>       | S79 |
| <sup>1</sup> H NMR spectrum of <b>62</b>        | S80 |
| <sup>13</sup> C NMR spectrum of <b>62</b>       | S81 |

|                                                 |     |
|-------------------------------------------------|-----|
| <sup>1</sup> H NMR spectrum of <b>64</b>        | S82 |
| <sup>13</sup> C NMR spectrum of <b>64</b>       | S83 |
| <sup>1</sup> H NMR spectrum of <b>65</b>        | S84 |
| <sup>13</sup> C NMR spectrum (APT) of <b>65</b> | S85 |
| <sup>1</sup> H NMR spectrum of <b>66</b>        | S86 |
| <sup>13</sup> C NMR spectrum (APT) of <b>66</b> | S87 |
| <sup>1</sup> H NMR spectrum of <b>67</b>        | S88 |
| <sup>13</sup> C NMR spectrum of <b>67</b>       | S89 |
| <sup>1</sup> H NMR spectrum of <b>69</b>        | S90 |
| <sup>13</sup> C NMR spectrum of <b>69</b>       | S91 |
| <sup>1</sup> H NMR spectrum of <b>71</b>        | S92 |
| <sup>13</sup> C NMR spectrum of <b>71</b>       | S93 |



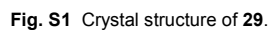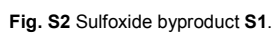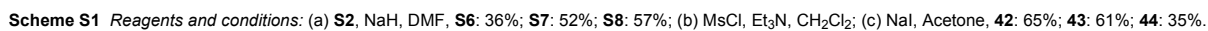

## Preparation of iodides

Most of these alkyl halides were either commercially available or could be obtained via iodination of the corresponding commercially available alcohol using literature methods.<sup>S1</sup> However, the uridine-based compounds **42–44** required additional synthetic effort. Their preparation started with, 2',3'-*O*-isopropylidene-5'-*O*-tosyl-3-(benzyloxymethyl)uridine (**S2**).<sup>S2</sup> As illustrated in Scheme 5, reaction of **S1** with 10 equivalents of diol **S3**, **S4** or **S5** and 1.2 equivalents of NaH in DMF afforded **S6**, **S7** and **S8** in 36%, 52% and 57% yield, respectively. Attempts to improve the yield of this displacement reaction by changing the ratio of the starting materials or the sequence reagent addition were unsuccessful. Compounds **S6** and **S7** were treated with MsCl to form the corresponding mesylates, which were subsequently heated with NaI at 50 °C to give iodides **42** and **43** in moderate yield (~60%). More vigorous conditions were required to convert **S8** into the required iodide, presumably due to steric hindrance arising from the isopropylidene moiety. After mesylation of **S8**, the intermediate was combined with freshly fused NaI in a sealed vessel and heated at 80 °C for 4 h, leading to **44** in 37% yield. Unreacted mesylate was also detected after the reaction. However the yield could not be improved by elongation of the reaction time or by raising the reaction temperature.

## Experimental

All reagents were purchased from commercial sources and were used without further purification. Solvents used in reactions were pre-dried by PURESOLV-400 System from Innovative Technology Inc. All reactions were monitored by TLC on silica gel G-25 UV254 (0.25 mm, Macherey–Nagel). Spots were detected under UV light and/or by charring with acidified ethanolic anisaldehyde. Solvents were evaporated under reduced pressure and below 50 °C (water bath). Column chromatography was performed on silica gel 60 (40–60 µm). The

ratio between silica gel and crude product ranged from 100:1 to 20:1 (w/w). Iatrobeds refers to a beaded silica gel 6RS-8060, which was manufactured by Iatron laboratories (Tokyo).  $^1\text{H}$  NMR spectra were recorded on VARIAN INOVA-NMR spectrometers at 400, 500 or 600 MHz and chemical shifts are referenced to  $\text{CDCl}_3$  (7.26,  $\text{CDCl}_3$ ) or  $\text{CD}_3\text{OD}$  (4.78,  $\text{CD}_3\text{OD}$ ).  $^{13}\text{C}$  NMR APT spectra were recorded at 100 or 125 MHz, and chemical shifts are referenced to  $\text{CDCl}_3$  (77.23,  $\text{CDCl}_3$ ) or  $\text{CD}_3\text{OD}$  (48.9,  $\text{CD}_3\text{OD}$ ).  $^1\text{H}$  NMR data are reported as though they are first order, and the peak assignments are made by 2D-NMR spectroscopy ( $^1\text{H}$ - $^1\text{H}$  COSY and HMQC). HRMS-ESI spectra were recorded on samples suspended in THF or  $\text{CH}_3\text{OH}$  and added NaCl. Optical rotations were measured on Perkin-Elmer 241 Polarimeter with sodium D line (589 nm) and are in units of  $\text{deg}\cdot\text{mL}(\text{dm}\cdot\text{g})^{-1}$ .

**(3*R*,4*S*)-3-(benzyloxy)-4-((*S*)-1,2-bis(benzyloxy)ethyl)tetrahydrothiophene 1,1-dioxide (25):**

To a solution of **21** (0.50 g, 1.15 mmol) in  $\text{CH}_2\text{Cl}_2$  (15 mL) was added *m*-CPBA, (77%, 0.62 g, 2.76 mmol) at rt and the mixture was stirred for 20 min. The solution was diluted with  $\text{CH}_2\text{Cl}_2$ , and washed with NaOH (1 M). The organic layer was then washed with brine, dried ( $\text{Na}_2\text{SO}_4$ ) and concentrated. The resulting residue was purified by chromatography (EtOAc–Hexane 1:4) to give **25** (0.50 g, 94%) as a colorless oil:  $R_f$  = 0.29 (EtOAc–Hexane 1:3);  $[\alpha]_D^{20}$  –62.7 (*c* 0.2,  $\text{CH}_2\text{Cl}_2$ );  $^1\text{H}$  NMR (400 MHz,  $\text{CDCl}_3$ )  $\delta$  7.39–7.22 (m, 15H), 4.66 (d,  $J$  = 11.7 Hz, 1H), 4.56–4.48 (m, 2H), 4.38–4.32 (m, 2H), 4.26 (d,  $J$  = 11.7 Hz, 1H), 4.20 (ddd,  $J$  = 7.8, 7.8, 7.8 Hz, 1H), 3.95 (ddd,  $J$  = 2.5, 5.0, 5.0 Hz, 1H), 3.56–3.47 (m, 2H), 3.39 (dd,  $J$  = 7.8, 13.1 Hz, 1H), 3.25 (m, 2H), 2.99 (dd,  $J$  = 7.8, 13.1 Hz, 1H), 2.70 (dddd,  $J$  = 2.5, 7.8, 9.4, 9.4 Hz, 1H);  $^{13}\text{C}$  NMR (100 MHz,  $\text{CDCl}_3$ )  $\delta$  137.9, 137.6, 136.9, 128.6, 128.5, 128.4, 128.3, 128.1, 128.0, 127.9, 127.8, 127.7, 74.4, 73.5, 73.4, 72.6, 72.4, 70.6, 56.1, 51.4, 45.5; HRMS-ESI  $m/z$   $[\text{M}+\text{Na}]^+$  calcd for  $\text{C}_{27}\text{H}_{30}\text{O}_5\text{SNa}$ : 489.1706, found: 489.1704.

**(3*R*,4*R*)-3-(benzyloxy)-4-((*S*)-1,2-bis(benzyloxy)ethyl)tetrahydrothiophene 1,1-dioxide**

**(26):** To a solution of tetrahydrothiophene **22** (25.3 mg, 0.061 mmol) in CH<sub>2</sub>Cl<sub>2</sub> (3 mL) was added *m*-CPBA (77%, 34.1 mg, 1.53 mmol) at rt and the mixture was stirred for 20 min. The solution was then diluted with CH<sub>2</sub>Cl<sub>2</sub>, and washed with NaOH (1 M). The organic layer was washed with brine, dried (Na<sub>2</sub>SO<sub>4</sub>) and concentrated. The residue was purified by chromatography (EtOAc–Hexane 1:4) to give **26** as a colorless oil (26.6 mg, 94%): *R<sub>f</sub>* = 0.22 (EtOAc–Hexane 1:3); [α]<sub>D</sub><sup>20</sup> –66.4 (*c* 0.6, CH<sub>2</sub>Cl<sub>2</sub>); <sup>1</sup>H NMR (500 MHz, CDCl<sub>3</sub>) δ 7.38–7.24 (m, 15H), 4.66 (d, *J* = 11.4 Hz, 1H), 4.59–4.56 (m, 3H), 4.49 (d, *J* = 12.1 Hz, 1H), 4.38 (d, *J* = 11.4 Hz, 1H), 4.29 (d, *J* = 11.4 Hz, 1H), 3.88 (ddd, *J* = 3.7, 3.7, 9.7 Hz, 1H), 3.65 (dd, *J* = 3.7, 10.7 Hz, 1H), 3.47 (d, *J* = 14.0 Hz, 1H), 3.39 (dd, *J* = 3.7, 10.7 Hz, 1H), 3.14–3.04 (m, 3H), 2.87 (dddd, *J* = 2.9, 7.2, 9.7, 13.0 Hz, 1H); <sup>13</sup>C NMR (125 MHz, CDCl<sub>3</sub>) δ 138.1, 137.6, 136.9, 128.6, 128.5, 127.7, 127.6, 127.5, 76.0, 75.2, 73.5, 72.2, 71.1, 69.5, 59.9, 51.6, 44.8; HRMS-ESI *m/z* [M+Na]<sup>+</sup> calcd for C<sub>27</sub>H<sub>30</sub>O<sub>5</sub>SNa: 489.1706, found: 489.1702.

**(3*R*,4*S*)-3-(hydroxyl)-4-((*S*)-1,2-dihydroxyethyl)tetrahydrothiophene 1,1-dioxide (27):**

To a solution of **25** (110 mg, 0.2 mmol) in CH<sub>3</sub>OH (5 mL) and CH<sub>2</sub>Cl<sub>2</sub> (1 mL) was added HOAc (10 μL) and Pd–C (10%, 10 g). The reaction mixture was stirred under a H<sub>2</sub> atmosphere for 48 h at rt. The solution was filtered and the filtrate was concentrated to give **27** as a colorless oil (48 mg, 98%): *R<sub>f</sub>* = 0.22 (CH<sub>2</sub>Cl<sub>2</sub>–CH<sub>3</sub>OH 9:1); [α]<sub>D</sub><sup>20</sup> –56.9 (*c* = 2.6, CH<sub>3</sub>OH); <sup>1</sup>H NMR (500 MHz, CD<sub>3</sub>OD) δ 4.42 (ddd, *J* = 7.9, 7.9, 7.9 Hz, 1H), 3.97 (ddd, *J* = 3.2, 6.0, 6.0 Hz, 1H), 3.52–3.31 (m, 3H), 3.26 (dd, *J* = 8.0, 13.3 Hz, 1H), 3.14 (dd, *J* = 11.2, 13.3 Hz, 1H), 2.99 (dd, *J* = 7.9, 13.3 Hz, 1H), 2.47 (dddd, *J* = 3.2, 7.9, 8.0, 11.2 Hz, 1H); <sup>13</sup>C NMR (125 MHz, CD<sub>3</sub>OD) δ 69.7, 69.1, 66.0, 59.3, 52.6, 48.3; HRMS-ESI *m/z* [M+Na]<sup>+</sup> calcd for C<sub>6</sub>H<sub>12</sub>O<sub>5</sub>SNa: 219.0298, found: 219.0298.

**(3*R*,4*R*)-3-(hydroxyl)-4-((*S*)-1,2-dihydroxyethyl)tetrahydrothiophene 1,1-dioxide (28):**

To a solution of **26** (0.39 g, 0.8 mmol) in CH<sub>3</sub>OH (15 mL) and CH<sub>2</sub>Cl<sub>2</sub> (3 mL) was added HOAc

(50  $\mu$ L) and Pd–C (10%, 40 mg). The solution was stirred under a H<sub>2</sub> atmosphere for 20 h at rt. The solution was filtered and the filtrate was concentrated to give **28** as a colorless oil (0.17 g, 98%):  $R_f$  = 0.20 (CH<sub>2</sub>Cl<sub>2</sub>–CH<sub>3</sub>OH 9:1);  $[\alpha]_D^{20}$  –31.6 ( $c$  1.31 in CH<sub>3</sub>OH); <sup>1</sup>H NMR (500 MHz, CD<sub>3</sub>OD)  $\delta$  = 4.77 (dd,  $J$  = 3.3, 3.5 Hz, 1H), 3.82 (m, 1H), 3.62 (dd,  $J$  = 4.0, 11.5 Hz, 1H), 3.51 (dd,  $J$  = 5.1, 11.5 Hz, 1H), 3.39–3.19 (m, 2H), 3.12 (d,  $J$  = 10.3 Hz, 2H), 2.53 (dddd,  $J$  = 3.3, 10.3, 10.3, 10.3 Hz, 1H); <sup>13</sup>C NMR (125 MHz, CD<sub>3</sub>OD)  $\delta$  71.3, 69.3, 66.0, 62.7, 52.1, 46.1; HRMS-ESI  $m/z$  [M+Na]<sup>+</sup> calcd for C<sub>6</sub>H<sub>12</sub>O<sub>5</sub>SNa: 219.0298, found: 219.0298.

**(3*R*,4*R*)-3-(hydroxyl)-4-((2-(2,4-dinitrophenyl)hydrazinylidene)methyl)tetra-hydrothiophene 1,1-dioxide (29):** To a solution of **28** (0.10 g, 0.51 mmol) in THF (3 mL) and H<sub>2</sub>O (0.5 mL) was added NaIO<sub>4</sub> (0.16 g, 0.76 mmol) and NaHCO<sub>3</sub> (0.09 g, 1.0 mmol). The mixture was stirred for 30 min and then the precipitate was filtered. The filtrate was concentrated and the resulting residue was purified by chromatography (CH<sub>2</sub>Cl<sub>2</sub>–CH<sub>3</sub>OH, 20:1). The product ( $R_f$  = 0.5 (CH<sub>2</sub>Cl<sub>2</sub>–CH<sub>3</sub>OH, 9:1)) was dissolved in CH<sub>3</sub>OH and was added a solution of (2,4-dinitrophenyl)hydrazine (1 M, 1 mL). After stirring for 10 min, the mixture was concentrated and the resulting residue was purified by chromatography (CH<sub>2</sub>Cl<sub>2</sub>–CH<sub>3</sub>OH, 19:1) to give **29** as a yellow solid (51 mg, 30%). This solid was recrystallized from CH<sub>3</sub>OH and acetone.  $R_f$  = 0.23 (CH<sub>2</sub>Cl<sub>2</sub>–CH<sub>3</sub>OH, 19:1); mp: 89–90 °C;  $[\alpha]_D^{20}$  +4.9 ( $c$  0.1, acetone); <sup>1</sup>H NMR (500 MHz, CD<sub>3</sub>COCD<sub>3</sub>)  $\delta$  8.97 (d,  $J$  = 2.7 Hz, 1H), 8.39–8.36 (m, 1H), 8.09–8.06 (m, 2H), 4.98 (m, 1H), 3.64–3.59 (m, 2H), 3.44 (dd,  $J$  = 5.0, 13.8 Hz, 1H), 3.33 (m, 1H), 3.25 (dd,  $J$  = 1.6, 13.8, Hz, 1H); <sup>13</sup>C NMR (125 MHz, DMSO-*d*<sub>6</sub>)  $\delta$  150.7; 144.5, 136.8, 129.6, 129.0, 122.8, 116.4, 68.7, 60.7, 50.6, 44.9; HRMS-ESI  $m/z$  [M+Na]<sup>+</sup> calcd for C<sub>11</sub>H<sub>12</sub>N<sub>4</sub>O<sub>7</sub>SNa: 367.0319, found: 367.0321.

**2',3'-*O*-isopropylidene-5'-*O*-(3-hydroxypropyl)-3-(benzyloxymethyl)uridine (S6):** To a solution of **S2** (0.50 g, 0.9 mmol) and 1,3-propanediol (**S3**) (0.69 g, 9.0 mmol) in DMF (4 mL) at 0 °C was added NaH (72 mg, 1.8 mmol, 60% in mineral oil). The solution was stirred at rt

for 20 h and then was added water H<sub>2</sub>O (10 mL). The mixture was extracted with Et<sub>2</sub>O. The organic layer was washed with brine, dried (MgSO<sub>4</sub>) and concentrated. The residue was purified by chromatography (EtOAc–Hexane 2:1) to give **S6** as a colorless oil (0.15 g, 36%):  $R_f$  = 0.14 (EtOAc–Hexane 2.5:1);  $[\alpha]_D^{20}$  –3.3 ( $c$  1.0, CH<sub>2</sub>Cl<sub>2</sub>); <sup>1</sup>H NMR (400 MHz, CDCl<sub>3</sub>)  $\delta$  7.44 (d,  $J$  = 8.2 Hz, 1H), 7.38–7.23 (m, 5H), 5.77 (d,  $J$  = 1.9 Hz, 1H), 5.73 (d,  $J$  = 8.2 Hz, 1H), 5.50 (d,  $J$  = 9.7 Hz, 1H), 5.47 (d,  $J$  = 9.7 Hz, 1H), 4.81–4.77 (m, 2H), 4.70 (s, 2H), 4.37 (ddd,  $J$  = 3.0, 3.0, 4.5 Hz, 1H), 3.73–3.69 (m, 3H), 3.67–3.58 (m, 3H), 1.83–1.77 (m, 2H), 1.58 (s, 3H), 1.37 (s, 3H); <sup>13</sup>C NMR (125 MHz, CDCl<sub>3</sub>)  $\delta$  162.6; 150.8, 139.9, 137.9, 128.3, 127.6, 114.1, 101.6, 94.4, 85.9, 85.2, 80.9, 72.3, 70.9, 70.3, 69.6, 60.6, 32.2, 27.2, 25.4; HRMS-ESI  $m/z$  [M+Na]<sup>+</sup> calcd for C<sub>23</sub>H<sub>30</sub>N<sub>2</sub>O<sub>8</sub>Na: 485.1894, found: 485.1894.

**2'3'-O-isopropylidene-5'-O-(3-iodopropyl)-3-(benzyloxymethyl) uridine (42):** To a solution of compound **S6** (150 mg, 0.32 mmol) in CH<sub>2</sub>Cl<sub>2</sub> (10 mL) was added Et<sub>3</sub>N (1 mL) and MsCl (43 mg, 0.38 mmol) at 0 °C. The mixture was stirred for 30 min at rt and then was added H<sub>2</sub>O (10 mL). The organic layer was washed with brine, dried over MgSO<sub>4</sub> and concentrated to give the crude mesylate. The mesylate was dissolved in acetone (10 mL) and then reacted with fresh fused NaI (70 mg, 0.47 mmol). The reaction was heated at 50 °C for 4 h, cooled and concentrated. The crude product was purified by chromatography (EtOAc–Hexane 1:2) to give **42** as a colorless oil (121 mg, 65%):  $R_f$  = 0.11 (EtOAc–Hexane 1:2);  $[\alpha]_D^{20}$  –6.0 ( $c$  1.6, CH<sub>2</sub>Cl<sub>2</sub>); <sup>1</sup>H NMR (500 MHz, CDCl<sub>3</sub>)  $\delta$  7.47 (d,  $J$  = 8.1 Hz, 1H), 7.40–7.28 (m, 5H), 5.83 (d,  $J$  = 2.2 Hz, 1H), 5.76 (d,  $J$  = 8.1 Hz, 1H), 5.52 (d,  $J$  = 9.7 Hz, 1H), 5.49 (d,  $J$  = 9.7 Hz, 1H), 4.82 (dd,  $J$  = 3.0, 6.2 Hz, 1H), 4.78 (dd,  $J$  = 2.2, 6.2 Hz, 1H), 4.73 (s, 2H), 4.41 (ddd,  $J$  = 3.0, 3.1, 4.4 Hz, 1H), 3.76 (dd,  $J$  = 3.0, 10.5 Hz, 1H), 3.65 (dd,  $J$  = 4.4, 10.5 Hz, 1H), 3.59–3.56 (m, 2H), 3.22 (dd,  $J$  = 6.8, 6.8 Hz, 2H), 2.07–2.02 (m, 2H), 1.62 (s, 3H), 1.39 (s, 3H); <sup>13</sup>C NMR (125 MHz, CDCl<sub>3</sub>)  $\delta$  162.6; 150.8, 139.6, 137.9, 128.2, 127.6, 114.1, 101.5, 94.2, 86.0, 85.4, 80.9, 72.3, 71.0, 70.9, 70.3, 32.8, 27.2, 25.4, 2.5; HRMS-ESI  $m/z$  [M+H]<sup>+</sup> calcd for C<sub>23</sub>H<sub>30</sub>N<sub>2</sub>O<sub>7</sub>I: 595.0912, Found: 595.0912.

**2',3'-*O*-isopropylidene-5'-*O*-(4-hydroxybutyl)-3-(benzyloxymethyl)uridine (S7):** To a solution of **S1** (0.89 g, 1.6 mmol) and 1,4-butanediol (**S4**) (1.62 g, 19.4 mmol) in DMF (4 mL) at 0 °C was added NaH (128 mg, 3.2 mmol, 60% in mineral oil). The reaction was stirred at rt for 20 h and then was added H<sub>2</sub>O (10 mL). The mixture was extracted with Et<sub>2</sub>O and the organic layer was washed with brine, dried (MgSO<sub>4</sub>) and concentrated. The resulting residue was purified by chromatography (EtOAc–Hexane 2:1) to give **S7** as a colorless oil (0.40 g, 52%):  $R_f = 0.16$  (EtOAc–Hexane 2.5:1);  $[\alpha]_D^{20} -3.7$  ( $c = 2.4$ , CH<sub>2</sub>Cl<sub>2</sub>); <sup>1</sup>H NMR (500 MHz, CDCl<sub>3</sub>)  $\delta$  7.53 (d,  $J = 8.1$  Hz, 1H), 7.36–7.23 (m, 5H), 5.83 (s, 1H), 5.71 (d,  $J = 8.1$  Hz, 1H), 5.59 (d,  $J = 9.8$  Hz, 1H), 5.45 (d,  $J = 9.8$  Hz, 1H), 4.78–4.74 (m, 2H), 4.70 (s, 2H), 4.38 (ddd,  $J = 2.6, 2.6, 3.9$  Hz, 1H), 3.69 (dd,  $J = 2.6, 10.7$  Hz, 1H), 3.61–3.57 (m, 3H), 3.59–3.46 (m, 2H), 1.64–1.55 (m, 4H), 1.57 (s, 3H), 1.36 (s, 3H); <sup>13</sup>C NMR (125 MHz, CDCl<sub>3</sub>)  $\delta$  162.7; 150.9, 139.7, 137.9, 128.3, 127.6, 114.0, 101.4, 94.0, 85.9, 85.4, 80.9, 72.3, 71.6, 70.7, 70.3, 62.4, 29.5, 27.2, 26.2, 25.4; HRMS-ESI  $m/z$   $[M+Na]^+$  calcd for C<sub>24</sub>H<sub>32</sub>N<sub>2</sub>O<sub>8</sub>Na: 499.2051, found: 499.2046.

**2'3'-*O*-isopropylidene-5'-*O*-(4-iodobutyl)-3-(benzyloxymethyl) uridine (43):** To a solution of compound **S7** (140 mg, 0.29 mmol) in CH<sub>2</sub>Cl<sub>2</sub> (10 mL) was added Et<sub>3</sub>N (1 mL) and MsCl (40 mg, 0.35 mmol) at 0 °C. The mixture was stirred for 30 min at rt and then was added H<sub>2</sub>O (10 mL). The organic layer was washed with brine, dried over MgSO<sub>4</sub> and concentrated to give the crude mesylate. The mesylate was dissolved in acetone (10 mL) and was reacted with fresh fused NaI (65 mg, 0.44 mmol). The reaction was heated at 50 °C for 4 h, cooled and concentrated. The crude product was purified by chromatography (EtOAc–Hexane 1:2) to give **43** as a colorless oil (105 mg, 61%):  $R_f = 0.17$  (EtOAc–Hexane 1:2);  $[\alpha]_D^{20} -7.4$  ( $c = 0.6$ , CH<sub>2</sub>Cl<sub>2</sub>); <sup>1</sup>H NMR (500 MHz, CDCl<sub>3</sub>)  $\delta$  7.48 (d,  $J = 8.1$  Hz, 1H), 7.36–7.23 (m, 5H), 5.82 (d,  $J = 1.9$  Hz, 1H), 5.72 (d,  $J = 8.1$  Hz, 1H), 5.49 (d,  $J = 9.8$  Hz, 1H), 5.45 (d,  $J = 9.8$  Hz, 1H), 4.77–4.73 (m, 2H), 4.69 (s, 2H), 4.37 (ddd,  $J = 2.3, 3.1, 3.9$  Hz, 1H), 3.68 (dd,  $J = 2.3, 10.6$

Hz, 1H), 3.58 (dd,  $J = 3.9, 10.6$  Hz, 1H), 3.51–3.43 (m, 2H), 3.16 (dd,  $J = 6.7, 6.7$  Hz, 2H), 1.86–1.80 (m, 2H), 1.68–1.62 (m, 2H), 1.58 (s, 3H), 1.36 (s, 3H);  $^{13}\text{C}$  NMR (125 MHz,  $\text{CDCl}_3$ )  $\delta$  162.6; 150.9, 139.6, 137.9, 128.3, 127.6, 114.0, 101.5, 94.0, 85.9, 85.4, 80.9, 72.3, 70.8, 70.5, 71.4, 30.4, 30.1, 27.2, 25.4, 6.3; HRMS-ESI  $m/z$   $[\text{M}+\text{H}]^+$  calcd for  $\text{C}_{24}\text{H}_{32}\text{N}_2\text{O}_7\text{I}$ : 587.1249, found: 587.1260.

**2'3'-*O*-isopropylidene-5'-*O*-((2*S*,3*S*)-2,3-*O*-isopropylidene-2,3,4-trihydroxyl-butyl)-3-(benzyloxymethyl) uridine (S8):** To a solution of **S1** (0.61 g, 1.09 mmol) and **S5** (1.77 g, 10.9 mmol) in DMF (3 mL) was added NaH (66 mg, 1.63 mmol, 60% in mineral oil) at 0 °C. The reaction mixture was then warmed to rt, stirred overnight and was added  $\text{H}_2\text{O}$  (10 mL). The mixture was extracted with  $\text{Et}_2\text{O}$  and the organic layer was washed with brine, dried ( $\text{MgSO}_4$ ) and concentrated. The resulting residue was purified by chromatography ( $\text{EtOAc}$ –Hexane 2:1) to give **S8** as a colorless oil (0.340 g, 57 %):  $R_f = 0.29$  ( $\text{EtOAc}$ –Hexane 2.5:1);  $[\alpha]_{\text{D}}^{20} -9.6$  ( $c$  1.9,  $\text{CH}_2\text{Cl}_2$ );  $^1\text{H}$  NMR (500 MHz,  $\text{CDCl}_3$ )  $\delta$  = 7.45 (d,  $J = 8.2$  Hz, 1H), 7.37–7.23 (m, 5H), 5.80 (d,  $J = 2.1$  Hz, 1H), 5.74 (d,  $J = 8.2$  Hz, 1H), 5.49 (d,  $J = 9.7$  Hz, 1H), 5.45 (d,  $J = 9.7$  Hz, 1H), 4.82–4.76 (m, 2H), 4.70 (s, 2H), 4.33 (ddd,  $J = 3.2, 3.2, 4.4$  Hz, 1H), 4.04 (ddd,  $J = 4.9, 4.9, 8.3$  Hz, 1H), 3.87 (ddd,  $J = 4.2, 4.2, 8.3$  Hz, 1H), 3.79–3.75 (m, 2H), 3.71 (dd,  $J = 4.5, 10.7$  Hz, 1H), 3.66–3.63 (m, 3H), 1.58 (s, 3H), 1.41 (s, 6H), 1.36 (s, 3H);  $^{13}\text{C}$  NMR (125 MHz,  $\text{CDCl}_3$ )  $\delta$  = 162.6; 150.9, 140.1, 137.9, 128.3, 127.6, 114.0, 109.5, 101.9, 94.0, 85.6, 84.8, 80.7, 78.6, 76.4, 72.3, 71.9, 71.4, 70.3, 62.1, 27.2, 27.1, 27.0, 25.4; HRMS-ESI  $m/z$   $[\text{M}+\text{Na}]^+$  calcd for  $\text{C}_{27}\text{H}_{36}\text{N}_2\text{O}_{10}\text{Na}$ : 571.2262, found: 571.2265.

**2'3'-*O*-isopropylidene-5'-*O*-((2*S*,3*R*)-4-iodo-2,3-*O*-isopropylidene-2,3-dihydroxyl-butyl)-3-(benzyloxymethyl) uridine (44):** To a solution of compound **S8** (340 mg, 0.62 mmol) in  $\text{CH}_2\text{Cl}_2$  (10 mL) was added  $\text{Et}_3\text{N}$  (1 mL) and  $\text{MsCl}$  (85 mg, 0.74 mmol) at 0 °C. The mixture was stirred for 30 min at rt and then was added  $\text{H}_2\text{O}$  (10 mL). The solution was extracted with  $\text{Et}_2\text{O}$  and the organic layer was washed with brine, dried over  $\text{MgSO}_4$  and concentrated to



give the crude mesylate. The mesylate was dissolved in acetone (10 mL) and then reacted with fresh fused NaI (140 mg, 0.93 mmol) in a sealed vessel at 80 °C for 4 h, cooled and concentrated. The iodide was purified by chromatography (EtOAc–Hexane 1:2) to give **44** as a colorless oil (141 mg, 35%):  $R_f$  = 0.43 (EtOAc–Hexane 1:1);  $[\alpha]_D^{20}$  –11.6 ( $c$  = 2.0, CH<sub>2</sub>Cl<sub>2</sub>); <sup>1</sup>H NMR (500 MHz, CDCl<sub>3</sub>)  $\delta$  7.48 (d,  $J$  = 8.2 Hz, 1H), 7.38–7.24 (m, 5H), 5.84 (d,  $J$  = 2.6 Hz, 1H), 5.75 (d,  $J$  = 8.2 Hz, 1H), 5.50 (d,  $J$  = 9.7 Hz, 1H), 5.46 (d,  $J$  = 9.7 Hz, 1H), 4.82 (dd,  $J$  = 3.3, 6.3 Hz, 1H), 4.79 (dd,  $J$  = 2.5, 6.3 Hz, 1H), 4.70 (s, 2H), 4.35 (ddd,  $J$  = 3.1, 3.3, 4.4 Hz, 1H), 3.93 (ddd,  $J$  = 3.9, 5.6, 7.3 Hz, 1H), 3.85 (ddd,  $J$  = 5.5, 5.5, 7.3 Hz, 1H), 3.80 (dd,  $J$  = 3.1, 10.7 Hz, 1H), 3.75 (dd,  $J$  = 3.9, 10.6 Hz, 1H), 3.73 (dd,  $J$  = 4.4, 10.7 Hz, 1H), 3.67 (dd,  $J$  = 5.6, 10.6 Hz, 1H), 3.29 (d,  $J$  = 5.5 Hz, 2H), 1.59 (s, 3H), 1.44 (s, 3H), 1.40 (s, 3H), 1.36 (s, 3H); <sup>13</sup>C NMR (125 MHz, CDCl<sub>3</sub>)  $\delta$  162.6; 150.9, 140.0, 137.9, 128.3, 127.6, 114.3, 109.9, 102.0, 93.8, 85.6, 84.8, 80.8, 80.3, 76.9, 72.3, 72.1, 71.5, 70.3, 27.4, 27.3, 27.2, 25.4, 5.8; HRMS-ESI  $m/z$  [M+Na]<sup>+</sup> calcd for C<sub>27</sub>H<sub>35</sub>N<sub>2</sub>O<sub>9</sub>INa: 681.1280, found: 681.1285.

**(3R,4S)-3-(benzyloxy)-4-((S)-1,2-bis(benzyloxy)ethyl)-1-propyl-tetrahydro-1H-thiophenium tetrafluoroborate (45):** Using the general procedure for preparation of sulfonium ions, compound **21** (69 mg, 0.16 mmol) was treated with **30** (27.2 mg, 0.16 mmol) and AgBF<sub>4</sub> (32 mg, 0.16 mmol) to give **45** as a colorless oil (65 mg, 73%):  $R_f$  = 0.69 (CH<sub>2</sub>Cl<sub>2</sub>–CH<sub>3</sub>OH, 9:1); HRMS-ESI  $m/z$  [M–BF<sub>4</sub>]<sup>+</sup> calcd for C<sub>30</sub>H<sub>37</sub>O<sub>3</sub>S: 477.2458, found: 477.2459. The compound used in the next step without further characterization.

**(3R,4S)-3-((S)-1,2-dihydroxyethyl)-4-hydroxy-1-propyl-tetrahydro-1H-thiophenium chloride (46):** Using the general procedure for the benzyl deprotection, **45** (44 mg, 0.078 mmol) was treated with BCl<sub>3</sub> (1 M in CH<sub>2</sub>Cl<sub>2</sub>) and then Amberlyst (Cl<sup>–</sup> form) to give **46** as a 70:30 mixture of inseparable stereoisomers as a colorless oil (13 mg, 72%):  $R_f$  = 0.06 (CH<sub>3</sub>OH); <sup>1</sup>H NMR (500 MHz, CD<sub>3</sub>OD)  $\delta$  4.74 (dd,  $J$  = 2.0, 2.0 Hz, 0.7H), 4.67 (ddd,  $J$  = 5.4, 5.6, 5.6 Hz, 0.3H), 3.89–3.75 (m, 2H), 3.66–3.61 (m, 1H), 3.57–3.34 (m, 6H), 3.05 (dddd,  $J$  =

1.6, 2.1, 4.8, 6.6 Hz, 0.7H), 2.66 (dddd,  $J = 2.6, 6.0, 6.0, 8.6$  Hz, 0.3H), 1.90–1.82 (m, 2H), 0.90 (t,  $J = 7.4$  Hz, 3H);  $^{13}\text{C}$  NMR (125 MHz,  $\text{CD}_3\text{OD}$ )  $\delta$  80.0; 77.2, 70.9, 70.0, 66.1, 65.3, 53.8, 52.9, 50.3, 49.4, 48.1, 45.5, 42.9, 40.2, 20.5, 20.2, 13.1, 13.0; HRMS-ESI  $m/z$   $[\text{M}-\text{Cl}]^+$  calcd for  $\text{C}_9\text{H}_{19}\text{O}_3\text{S}$ : 207.1049, found: 207.1050.

**(3*R*,4*S*)-3-(benzyloxy)-4-((*S*)-1,2-bis(benzyloxy)ethyl)-1-propyl-tetrahydro-1*H*-thiophenium tetrafluoroborate (47):** Using the general procedure for the preparation of sulfonium ions, **21** (69 mg, 0.16 mmol) was treated with **31** (38.2 mg, 0.16 mmol) and  $\text{AgBF}_4$  (31 mg, 0.16 mmol) to give **47** as a colorless oil (76 mg, 77%):  $R_f = 0.70$  ( $\text{CH}_2\text{Cl}_2$ – $\text{CH}_3\text{OH}$ , 9:1); HRMS-ESI  $m/z$   $[\text{M}-\text{BF}_4]^+$  calcd for  $\text{C}_{35}\text{H}_{47}\text{O}_3\text{S}$ : 547.3240, found: 547.3245. The compound used in the next step without further characterization.

**(3*R*,4*S*)-3-((*S*)-1,2-dihydroxyethyl)-4-hydroxy-1-octyl-tetrahydro-1*H*-thiophenium chloride (48):** Using the general procedure for the benzyl deprotection, **47** (76 mg, 0.12 mmol) was treated with  $\text{BCl}_3$  (1 M in  $\text{CH}_2\text{Cl}_2$ ) and then Amberlyst ( $\text{Cl}^-$  form) to give **48** as a 70:30 mixture of inseparable stereoisomers as a colorless oil (32 mg, 86%):  $R_f$  0.06 ( $\text{CH}_3\text{OH}$ );  $^1\text{H}$  NMR (400 MHz,  $\text{CD}_3\text{OD}$ )  $\delta$  4.74 (dd,  $J = 1.9, 1.9$  Hz, 0.7H), 4.67 (ddd,  $J = 5.5, 5.7, 5.7$  Hz, 0.3H), 3.89–3.74 (m, 2H), 3.66–3.61 (m, 1H), 3.57–3.30 (m, 6H), 2.97 (dddd,  $J = 1.7, 3.3, 4.8, 6.6$  Hz, 0.7H), 2.66 (m,  $J = 2.3, 5.9, 5.9, 8.6$  Hz, 0.3H), 1.87–1.77 (m, 2H), 1.52–1.45 (m, 2H), 1.49–1.35 (m, 8H), 0.90 (t,  $J = 7.1$  Hz, 3H);  $^{13}\text{C}$  NMR (125 MHz,  $\text{CD}_3\text{OD}$ )  $\delta$  80.0; 77.2, 70.9, 70.0, 66.1, 65.3, 53.8, 51.6, 50.3, 48.1, 46.9, 43.7, 42.9, 40.2, 32.9, 30.1, 30.0, 29.5, 29.4, 26.8, 26.5, 14.4; HRMS-ESI  $m/z$   $[\text{M}-\text{Cl}]^+$  calcd for  $\text{C}_{14}\text{H}_{29}\text{O}_3\text{S}$ : 277.1832, found: 277.1832.

**(3*R*,4*S*)-3-(benzyloxy)-4-((*S*)-1,2-bis(benzyloxy)ethyl)-1-isobutyl-tetrahydro-1*H*-thiophenium tetrafluoroborate (49):** Using the general procedure for the preparation of sulfonium ions, **21** (77 mg, 0.18 mmol) was reacted with **32** (34 mg, 0.18 mmol) and  $\text{AgBF}_4$  (35 mg, 0.18 mmol) to give **49** as a colorless oil (24.3 mg, 24%):  $R_f = 0.70$  ( $\text{CH}_2\text{Cl}_2$ – $\text{CH}_3\text{OH}$ , 9:1);

HRMS-ESI  $m/z$   $[M-BF_4]^+$  calcd for  $C_{31}H_{39}O_3S$ : 491.2614, found: 491.2617. The compound used in the next step without further characterization.

**(3*R*,4*S*)-3-((*S*)-1,2-dihydroxyethyl)-4-hydroxy-1-isobutyl-tetrahydro-1*H*-thiophenium**

**chloride (50):** Using the general procedure for the benzyl deprotection, **49** (45 mg, 0.078 mmol) was treated with  $BCl_3$  (1 M in  $CH_2Cl_2$ ) and then Amberlyst ( $Cl^-$  form) to give **50** as a 70:30 mixture of inseparable stereoisomers as a colorless foam (18 mg, 88%):  $R_f$  = 0.06 ( $CH_3OH$ );  $^1H$  NMR (400 MHz,  $CD_3OD$ )  $\delta$  4.74 (dd,  $J$  = 2.0, 2.0 Hz, 0.7H), 4.68 (ddd,  $J$  = 5.2, 5.2, 5.2 Hz, 0.3H), 3.92 (dd,  $J$  = 1.8, 12.2 Hz, 0.7H), 3.86–3.78 (m, 1.3H), 3.66–3.33 (m, 7H), 3.06 (dddd,  $J$  = 1.7, 3.2, 4.9, 6.6 Hz, 0.7H), 2.69 (dddd,  $J$  = 2.4, 5.6, 5.6, 8.4 Hz, 0.3H), 2.20–2.08 (m, 1H), 1.13 (d,  $J$  = 6.7 Hz, 6H);  $^{13}C$  NMR (125 MHz,  $CD_3OD$ )  $\delta$  80.0; 77.4, 70.9, 70.0, 66.0, 65.3, 55.3, 53.9, 52.1, 51.6, 50.9, 48.9, 43.5, 40.9, 27.7, 27.6, 21.9, 21.7; HRMS-ESI  $m/z$   $[M-Cl]^+$  calcd for  $C_{10}H_{21}O_3S$ : 221.1206, found: 221.1207.

**(3*R*,4*S*)-3-(benzyloxy)-4-((*S*)-1,2-bis(benzyloxy)ethyl)-1-cyclohexylmethyl-tetrahydro-1*H*-thiophenium tetrafluoroborate (51):** Using the general procedure for the preparation of sulfonium ions, **21** (86 mg, 0.20 mmol) was reacted with iodide **33** (45 mg, 0.20 mmol) and  $AgBF_4$  (38 mg, 0.20 mmol) to give **51** as a colorless oil (10 mg, 8%):  $R_f$  = 0.34 ( $CH_2Cl_2-CH_3OH$ , 19:1); HRMS-ESI  $m/z$   $[M-BF_4]^+$  calcd for  $C_{34}H_{43}O_3S$ : 531.2927, found: 531.2925. The compound used in the next step without further characterization.

**(3*R*,4*S*)-3-((*S*)-1,2-dihydroxyethyl)-4-hydroxy-1-cyclohexylmethyl-tetrahydro-1*H*-thiophenium**

**chloride (52):** Using the general procedure for the benzyl deprotection, **51** (8 mg, 0.13 mmol) was treated with  $BCl_3$  (1 M in  $CH_2Cl_2$ ) and then Amberlyst ( $Cl^-$  form) to give **52** as a colorless foam as a 91:9 ratio of isomers (3.3 mg, 100%):  $R_f$  = 0.06 ( $CH_3OH$ );  $^1H$  NMR (600 MHz,  $CD_3OD$ )  $\delta$  4.73 (dd,  $J$  = 2.0, 2.0 Hz, 1H), 3.90 (dd,  $J$  = 1.8, 12.2 Hz, 1H), 3.78 (dd,  $J$  = 3.9, 12.5 Hz, 1H), 3.62 (ddd,  $J$  = 1.4, 5.6, 6.9 Hz, 1H), 3.46 (dd,  $J$  = 6.8, 12.2 Hz, 1H),

3.42 (dd,  $J = 6.7, 11.2$  Hz, 1H), 3.38 (dd,  $J = 7.1, 12.6$  Hz, 1H), 3.34–3.31 (m, 3H), 3.05 (dddd,  $J = 1.9, 3.4, 3.4, 6.8$  Hz, 1H), 1.91–1.77 (m, 4H), 1.72–1.69 (m, 1H), 1.40–1.32 (m, 2H), 1.28–1.18 (m, 2H), 1.17–1.11 (m, 2H);  $^{13}\text{C}$  NMR (100 MHz,  $\text{CD}_3\text{OD}$ )  $\delta$  80.0; 70.9, 65.3, 54.1, 53.9, 50.9, 43.5, 36.5, 33.2, 33.0, 26.8, 26.7; HRMS-ESI  $m/z$   $[\text{M}-\text{Cl}]^+$  calcd for  $\text{C}_{13}\text{H}_{25}\text{O}_3\text{S}$ : 261.1519, found: 261.1517.

**(3R,4S)-3-(benzyloxy)-4-((S)-1,2-bis(benzyloxy)ethyl)-1-(2-methoxyethyl)-tetrahydro-1H-thiophenium tetrafluoroborate (53):** Using the general procedure for the preparation of sulfonium ions, **21** (61 mg, 0.14 mmol) was reacted with **34** (28.7 mg, 0.15 mmol) and  $\text{AgBF}_4$  (30 mg, 0.15 mmol) to give **53** as a colorless oil (66 mg, 81%):  $R_f = 0.70$  ( $\text{CH}_2\text{Cl}_2$ – $\text{CH}_3\text{OH}$ , 9:1); HRMS-ESI  $m/z$   $[\text{M}-\text{BF}_4]^+$  calcd for  $\text{C}_{30}\text{H}_{37}\text{O}_4\text{S}$ : 493.2407, found: 493.2402. The compound used in the next step without further characterization.

**(3R,4S)-3-((S)-1,2-dihydroxyethyl)-4-hydroxy-1-(2-methoxyethyl)-tetrahydro-1H-thiophenium chloride (54):** Using the general procedure for the benzyl deprotection, **53** (38 mg, 0.065 mmol) was treated with  $\text{BCl}_3$  (1 M in  $\text{CH}_2\text{Cl}_2$ ) and then Amberlyst ( $\text{Cl}^-$  form) to give **54** as a 70:30 mixture of inseparable stereoisomers as a colorless foam (14 mg, 83%):  $R_f = 0.06$  ( $\text{CH}_3\text{OH}$ );  $^1\text{H}$  NMR (600 MHz,  $\text{CD}_3\text{OD}$ )  $\delta$  = 4.73 (dd,  $J = 2.0, 2.0$  Hz, 0.7H), 4.67 (ddd,  $J = 5.0, 5.0, 5.0$  Hz, 0.3H), 3.90–3.61 (m, 7H), 3.57–3.47 (m, 3H), 3.44–3.41 (m, 4H), 3.03 (dddd,  $J = 1.7, 3.3, 5.0, 7.0$  Hz, 0.7H), 2.68 (dddd,  $J = 2.3, 5.3, 5.3, 8.2$  Hz, 0.3H);  $^{13}\text{C}$  NMR (125 MHz,  $\text{CD}_3\text{OD}$ )  $\delta$  80.0; 77.4, 70.8, 70.0, 68.7, 68.4, 66.0, 65.3, 59.4, 53.7, 51.5, 51.2, 49.4, 47.8, 44.7, 43.9, 41.1; HRMS-ESI  $m/z$   $[\text{M}-\text{Cl}]^+$  calcd for  $\text{C}_9\text{H}_{19}\text{O}_4\text{S}$ : 223.0999, found: 223.0997.

**((3R,4S)-3-(benzyloxy)-4-((S)-1,2-bis(benzyloxy)ethyl)-1-(8-methoxyoctyl)-tetrahydro-1H-thiophenium tetrafluoroborate (55):** Using the general procedure for the preparation of sulfonium ions, **21** (103 mg, 0.24 mmol) was reacted with **35** (80 mg, 0.29 mmol) and  $\text{AgBF}_4$

(46 mg, 0.24 mmol) to give **55** as a colorless oil (152 mg, 97%):  $R_f$  = 0.70 (CH<sub>2</sub>Cl<sub>2</sub>–CH<sub>3</sub>OH, 9:1); HRMS-ESI  $m/z$  [M–BF<sub>4</sub>]<sup>+</sup> calcd for C<sub>36</sub>H<sub>49</sub>O<sub>4</sub>S: 577.3346, found: 577.3345. The compound used in the next step without further characterization.

**(3R,4S)-3-((S)-1,2-dihydroxyethyl)-4-hydroxy-1-(8-methoxyoctyl)-tetrahydro-1H-thiophenium chloride (56):** Using the general procedure for the benzyl deprotection, **55** (100 mg, 0.15 mmol) was treated with BCl<sub>3</sub> (1 M in CH<sub>2</sub>Cl<sub>2</sub>) and then Amberlyst (Cl<sup>–</sup> form) to give product **56** as a 70:30 mixture of inseparable stereoisomers as a colorless foam (32 mg, 55%):  $R_f$  = 0.06 (CH<sub>3</sub>OH); <sup>1</sup>H NMR (500 MHz, CD<sub>3</sub>OD)  $\delta$  4.74 (dd,  $J$  = 2.0, 2.0 Hz, 0.7H), 4.67 (ddd,  $J$  = 5.7, 5.7, 5.7 Hz, 0.3H), 3.89–3.75 (m, 2H), 3.66–3.61 (m, 1H), 3.57–3.36 (m, 8H), 3.30 (s, 3H), 2.97 (dddd,  $J$  = 1.6, 3.1, 5.6, 6.5 Hz, 0.7H), 2.66 (dddd,  $J$  = 2.3, 5.9, 5.9, 8.5 Hz, 0.3H), 1.87–1.78 (m, 2H), 1.58–1.46 (m, 4H), 1.40–1.35 (m, 6H); <sup>13</sup>C NMR (100 MHz, CD<sub>3</sub>OD)  $\delta$  80.0; 77.2, 73.8, 70.9, 70.0, 66.1, 65.3, 58.8, 53.8, 51.6, 50.3, 48.1, 46.9, 43.7, 42.9, 40.2, 30.5, 30.0, 29.9, 29.3, 27.0, 26.7, 26.5; HRMS-ESI  $m/z$  [M–Cl]<sup>+</sup> calcd for C<sub>15</sub>H<sub>31</sub>O<sub>4</sub>S: 307.1937, found: 307.1934.

**(3R,4S)-3-(benzyloxy)-4-((S)-1,2-bis(benzyloxy)ethyl)-1-(3-benzyloxypropyl)-tetrahydro-1H-thiophenium tetrafluoroborate (57):** Using the general procedure for the preparation of sulfonium ions, compound **21** (70 mg, 0.16 mmol) was reacted with **36** (50 mg, 0.18 mmol) and AgBF<sub>4</sub> (35 mg, 0.18 mmol) to give **57** as a colorless oil (52 mg, 48%):  $R_f$  = 0.67 (CH<sub>2</sub>Cl<sub>2</sub>–CH<sub>3</sub>OH, 9:1); HRMS-ESI  $m/z$  [M–BF<sub>4</sub>]<sup>+</sup> calcd for C<sub>37</sub>H<sub>43</sub>O<sub>4</sub>S: 583.2877, found: 583.2881. The compound used in the next step without further characterization.

**(3R,4S)-3-((S)-1,2-dihydroxyethyl)-4-hydroxy-1-(3-hydroxypropyl)-tetrahydro-1H-thiophenium chloride (58):** Using the general procedure for the benzyl deprotection, **57** (63 mg, 0.09 mmol) was treated with BCl<sub>3</sub> (1 M in CH<sub>2</sub>Cl<sub>2</sub>) and then Amberlyst (Cl<sup>–</sup> form) to give **58** as a 70:30 mixture of stereoisomers as a colorless foam (23 mg, 94%):  $R_f$  = 0.05 (CH<sub>3</sub>OH); <sup>1</sup>H

NMR (500 MHz, CD<sub>3</sub>OD)  $\delta$  4.73 (m, 0.7H), 4.67 (ddd,  $J$  = 5.1, 5.1, 5.1 Hz, 0.3H), 3.90–3.38 (m, 11H), 3.06–3.04 (m, 0.7H), 2.66 (dddd,  $J$  = 2.2, 6.1, 8.4, 11.4 Hz, 0.3H), 2.08–2.03 (m, 2H); <sup>13</sup>C NMR (125 MHz, CD<sub>3</sub>OD)  $\delta$  78.2, 74.5, 70.2, 69.3, 65.1, 64.7, 64.1, 60.2, 52.0, 49.9, 49.1, 45.6, 43.7, 42.8, 41.8, 39.9, 28.6, 28.3; HRMS-ESI  $m/z$  [M–Cl]<sup>+</sup> calcd for C<sub>9</sub>H<sub>19</sub>O<sub>4</sub>S: 223.0999, found: 223.0999.

**(3*R*,4*S*)-3-(benzyloxy)-4-((*S*)-1,2-bis(benzyloxy)ethyl)-1-(8-benzyloxyoctyl)-tetrahydro-1*H*-thiophenium tetrafluoroborate (59):** Using the general procedure for the preparation of sulfonium ions, **21** (80 mg, 0.18 mmol) was reacted with **37** (75 mg, 0.22 mmol) and AgBF<sub>4</sub> (42 mg, 0.22 mmol) to give **59** as a colorless oil (123 mg, 90%):  $R_f$  = 0.38 (CH<sub>2</sub>Cl<sub>2</sub>–CH<sub>3</sub>OH, 9:1); HRMS-ESI  $m/z$  [M–BF<sub>4</sub>]<sup>+</sup> calcd for C<sub>42</sub>H<sub>53</sub>O<sub>4</sub>S: 653.3659, found: 653.3659. The compound used in the next step without further characterization.

**(3*R*,4*S*)-3-((*S*)-1,2-dihydroxyethyl)-4-hydroxy-1-(8-hydroxyoctyl)-tetrahydro-1*H*-thiophenium chloride (60):** Using the general procedure for the benzyl deprotection, **59** (123 mg, 0.17 mmol) was treated with BCl<sub>3</sub> (1 M in CH<sub>2</sub>Cl<sub>2</sub>) and then Amberlyst (Cl<sup>–</sup> form) to give **60** as a 75:25 mixture of inseparable stereoisomers as a colorless foam (43 mg, 79%):  $R_f$  = 0.06 (CH<sub>3</sub>OH); <sup>1</sup>H NMR (500 MHz, CD<sub>3</sub>OD)  $\delta$  4.74 (dd,  $J$  = 2.0, 2.0 Hz, 0.75H), 4.67 (ddd,  $J$  = 5.6, 5.6, 5.6 Hz, 0.25H), 3.89–3.84 (m, 1H), 3.81–3.74 (m, 1H), 3.65–3.61 (m, 1H), 3.50–3.35 (m, 8H), 3.05 (dddd,  $J$  = 1.6, 3.1, 5.6, 6.5 Hz, 0.75H), 2.68 (dddd,  $J$  = 2.4, 5.9, 5.9, 8.5 Hz, 0.25H), 1.87–1.78 (m, 2H), 1.55–1.47 (m, 4H), 1.43–1.35 (m, 6H); <sup>13</sup>C NMR (125 MHz, CD<sub>3</sub>O)  $\delta$  80.0; 77.2, 70.9, 70.0, 66.1, 65.3, 62.9, 53.8, 51.6, 50.3, 48.1, 46.9, 43.8, 42.9, 40.2, 33.7, 30.2, 30.0, 29.9, 29.4, 29.3, 26.8, 26.5; HRMS-ESI  $m/z$  [M–Cl]<sup>+</sup> calcd for C<sub>14</sub>H<sub>29</sub>O<sub>4</sub>S: 293.1781, found: 193.1783.

**(3*R*,4*S*)-3-(benzyloxy)-4-((*S*)-1,2-bis(benzyloxy)ethyl)-1-(12-benzyloxy-dodecyl)-tetrahydro-1*H*-thiophenium tetrafluoroborate (61):** Using the general procedure for the preparation

of sulfonium ions, compound **21** (80 mg, 0.18 mmol) was reacted with **38** (89 mg, 0.22 mmol) and AgBF<sub>4</sub> (42 mg, 0.22 mmol) to give **61** as a colorless oil (116 mg, 81%):  $R_f$  = 0.38 (CH<sub>2</sub>Cl<sub>2</sub>–CH<sub>3</sub>OH, 9:1); HRMS-ESI  $m/z$  [M–BF<sub>4</sub>]<sup>+</sup> calcd for C<sub>46</sub>H<sub>61</sub>O<sub>4</sub>S: 709.4285, found: 709.4288. The compound used in the next step without further characterization.

**(3R,4S)-3-((S)-1,2-dihydroxyethyl)-4-hydroxy-1-(12-hydroxydodecyl)-tetrahydro-1H-thiophenium chloride (62):** Using the general procedure for the benzyl deprotection, **61** (116 mg, 0.15 mmol) was treated with BCl<sub>3</sub> (1 M in CH<sub>2</sub>Cl<sub>2</sub>) and then Amberlyst (Cl<sup>–</sup> form) to give **62** as a 60:40 ratio of inseparable stereoisomers as a colorless foam (39 mg, 70%):  $R_f$  = 0.06 (CH<sub>3</sub>OH); <sup>1</sup>H NMR (500 MHz, CD<sub>3</sub>OD) δ 4.74 (dd,  $J$  = 2.0, 2.0 Hz, 0.6H), 4.67 (ddd,  $J$  = 5.6, 5.6, 5.6 Hz, 0.4H), 3.89–3.84 (m, 1H), 3.82–3.74 (m, 1H), 3.66–3.61 (m, 1H), 3.54–3.34 (m, 8H), 3.05 (dddd,  $J$  = 1.9, 3.3, 4.7, 6.8 Hz, 0.6H), 2.68 (dddd,  $J$  = 2.4, 5.0, 5.0, 8.5 Hz, 0.4H), 1.86–1.77 (m, 2H), 1.55–1.45 (m, 4H), 1.40–1.28 (m, 14H); <sup>13</sup>C NMR (100 MHz, CD<sub>3</sub>OD) δ 80.0; 77.2, 70.9, 70.0, 66.1, 65.3, 63.0, 53.8, 51.6, 50.3, 48.1, 46.9, 43.8, 42.9, 40.2, 33.7, 30.7, 30.6, 30.4, 30.1, 29.5, 29.4, 26.9, 26.8, 26.6; HRMS-ESI  $m/z$  [M–Cl]<sup>+</sup> calcd for C<sub>18</sub>H<sub>37</sub>O<sub>4</sub>S: 349.2407, found: 349.2407.

**(3R,4S)-3-(benzyloxy)-4-((S)-1,2-bis(benzyloxy)ethyl)-1-(2-phenethyl)-tetrahydro-1H-thiophenium tetrafluoroborate (63):** Using the general procedure for the preparation of sulfonium ions, **21** (75 mg, 0.17 mmol) was reacted with **41** (32 mg, 0.18 mmol) and AgBF<sub>4</sub> (34 mg, 0.18 mmol) to give **63** as an colorless oil (34 mg, 32%):  $R_f$  = 0.70 (CH<sub>2</sub>Cl<sub>2</sub>–CH<sub>3</sub>OH, 9:1); HRMS-ESI  $m/z$  [M–BF<sub>4</sub>]<sup>+</sup> calcd for C<sub>35</sub>H<sub>39</sub>O<sub>3</sub>S: 539.2614, found: 539.2615. The compound used in the next step without further characterization.

**(3R,4S)-3-((S)-1,2-dihydroxyethyl)-4-hydroxy-1-(2-phenethyl)-tetrahydro-1H-thiophenium chloride (64):** Using the general procedure for the benzyl deprotection, **63** (34 mg, 0.054 mmol) was treated with BCl<sub>3</sub> (1 M in CH<sub>2</sub>Cl<sub>2</sub>) and then Amberlyst (Cl<sup>–</sup> form) to give **64** as a

70:30 mixture of inseparable stereoisomers as a colorless foam (15 mg, 91%):  $R_f$  = 0.06 (CH<sub>3</sub>OH); <sup>1</sup>H NMR (400 MHz, CD<sub>3</sub>OD)  $\delta$  7.39–7.27 (m, 5H), 4.71 (dd,  $J$  = 1.9, 1.9 Hz, 0.7H), 4.65 (ddd,  $J$  = 5.1, 5.1, 5.2 Hz, 0.3H), 3.84–3.34 (m, 9.6H), 3.18 (dd,  $J$  = 7.4, 7.4 Hz, 1.4H), 2.97 (m, 0.7H), 2.66 (dddd,  $J$  = 2.0, 5.2, 5.2, 7.5 Hz, 0.3H); <sup>13</sup>C NMR (125 MHz, CD<sub>3</sub>OD)  $\delta$  138.3; 130.2, 129.8, 128.6, 80.0, 77.5, 70.8, 70.0, 65.9, 65.3, 53.8, 51.6, 50.5, 48.4, 45.4, 43.7, 43.1, 40.4, 32.8, 32.6; HRMS-ESI  $m/z$  [M–Cl]<sup>+</sup> calcd for C<sub>14</sub>H<sub>21</sub>O<sub>3</sub>S: 269.1206, found: 269.1202.

**(*S*)-1-((3*S*,4*R*)-4-hydroxytetrahydrothiophen-3-yl)ethane-1,2-diol (65):** Ammonia (20 mL) was condensed at –78 °C and a solution of **21** (0.16 g, 0.37 mmol) in THF (6 mL) was added. To this mixture was then added sodium metal (0.5 g, 22 mmol) and CH<sub>3</sub>OH (30  $\mu$ L). The reaction was stirred for 1 h at –78 °C and then was added CH<sub>3</sub>OH (10 mL). The solution was then warmed to rt, neutralized with HOAc and concentrated. The resulting residue was purified by chromatography (CH<sub>2</sub>Cl<sub>2</sub>–CH<sub>3</sub>OH 9:1) to give **65** as a colorless oil (54.0 mg, 90%):  $R_f$  = 0.27 (CH<sub>2</sub>Cl<sub>2</sub>–CH<sub>3</sub>OH 9:1); [ $\alpha$ ]<sub>D</sub><sup>20</sup> –9.2 ( $c$  = 1.7, CH<sub>3</sub>OH); <sup>1</sup>H NMR (400 MHz, CD<sub>3</sub>OD)  $\delta$  4.22 (ddd,  $J$  = 6.0, 7.7, 7.7 Hz, 1H), 3.72 (ddd,  $J$  = 5.0, 5.0, 6.7 Hz, 1H), 3.56 (dd,  $J$  = 5.0, 11.3 Hz, 1H), 3.51 (dd,  $J$  = 6.7, 11.3 Hz, 1H), 2.94 (dd,  $J$  = 6.0, 10.5 Hz, 1H), 2.88 (dd,  $J$  = 8.8, 10.6 Hz, 1H), 2.82 (dd,  $J$  = 7.6, 10.6 Hz, 1H), 2.68 (dd,  $J$  = 7.7, 10.5 Hz, 1H), 2.87 (dddd,  $J$  = 5.0, 7.6, 7.7, 8.8 Hz, 1H); <sup>13</sup>C NMR (100 MHz, CD<sub>3</sub>OD)  $\delta$  76.2, 71.6, 66.4, 52.6, 37.3, 27.9; HRMS-ESI  $m/z$  [M+Na]<sup>+</sup> calcd for C<sub>6</sub>H<sub>12</sub>O<sub>3</sub>SNa: 187.0399, found: 187.0400.

**(3*R*,4*S*)-3-((*S*)-1,2-dihydroxyethyl)-4-hydroxy-1-(4-benzyl)-tetrahydro-1*H*-thiophenium bromide (66):** To a solution of **65** (11 mg, 0.07 mmol) in 1,1,1,3,3,3-hexafluoroisopropanol (0.5 mL) was added benzyl bromide **39** (14 mg, 0.08 mmol). The mixture was stirred at 50 °C for 5 h, cooled to rt and then concentrated. The residue was purified by chromatography (CH<sub>2</sub>Cl<sub>2</sub>–CH<sub>3</sub>OH 2:1) on Iatrobeds to give **66** as a colorless oil which is 70:30 mixture of



inseparable stereoisomers (12.6 mg, 57%):  $R_f$  = 0.06 (CH<sub>3</sub>OH); <sup>1</sup>H NMR (400 MHz, CD<sub>3</sub>OD)  $\delta$  7.55–7.46 (m, 5H), 4.79 (dd,  $J$  = 2.0, 2.0 Hz, 0.7H), 4.77 (s, 1.4H), 4.74 (s, 0.6H), 4.65 (ddd,  $J$  = 5.7, 5.7, 5.7 Hz, 0.3H), 3.88 (ddd,  $J$  = 2.3, 5.7, 5.7 Hz, 0.3H), 3.78 (dd,  $J$  = 1.9, 12.4 Hz, 0.7H), 3.72–3.34 (m, 6H), 3.11 (dddd,  $J$  = 1.9, 3.4, 3.4, 6.8 Hz, 0.7H), 2.70 (dddd,  $J$  = 2.4, 5.9, 5.9, 8.4 Hz, 0.3H); <sup>13</sup>C NMR (100 MHz, CD<sub>3</sub>OD)  $\delta$  131.6, 131.4, 131.3, 131.1, 131.0, 130.9, 130.8, 130.4, 80.2, 77.2, 70.8, 70.0, 66.1, 65.3, 53.9, 51.7, 50.9, 49.4, 47.8, 47.4, 42.7, 39.4; HRMS-ESI  $m/z$  [M–Br]<sup>+</sup> calcd for C<sub>13</sub>H<sub>19</sub>O<sub>3</sub>S: 255.1049, found: 255.1047.

**(3R,4S)-3-((S)-1,2-dihydroxyethyl)-4-hydroxy-1-(4-nitrobenzyl)-tetrahydro-1H-thiophenium bromide (67):** To a solution of **65** (10 mg, 0.061 mmol) in 1,1,1,3,3,3-hexafluoroisopropanol (1 mL) was added 4-nitrobenzyl bromide (**40**, 18 mg, 0.09 mmol). The mixture was stirred at 50 °C for 18 h, cooled to rt and then concentrated. The resulting residue was purified by chromatography (CH<sub>2</sub>Cl<sub>2</sub>–CH<sub>3</sub>OH 2:1) on Iatrobeds to give **67** as a yellowish oil which is a 70:30 mixture of inseparable stereoisomers (13.5 mg, 58%):  $R_f$  = 0.06 (CH<sub>3</sub>OH); <sup>1</sup>H NMR (500 MHz, CD<sub>3</sub>OD)  $\delta$  8.34–8.32 (m, 2H), 7.82–7.79 (m, 2H), 4.93–4.88 (m, 2H), 4.79 (dd,  $J$  = 2.0, 2.0 Hz, 0.7H), 4.67 (ddd,  $J$  = 5.4, 5.4, 5.4 Hz, 0.3H), 3.91–3.87 (m, 1H), 3.79–3.71 (m, 1.4H), 3.67–3.63 (m, 1.3H), 3.60–3.48 (m, 2H), 3.43–3.39 (m, 1.3H), 3.11 (dddd,  $J$  = 1.6, 3.2, 4.8, 6.5 Hz, 0.7H), 2.74 (dddd,  $J$  = 2.1, 5.6, 5.6, 7.8 Hz, 0.3H); <sup>13</sup>C NMR (125 MHz, CD<sub>3</sub>OD)  $\delta$  138.3, 137.7, 132.8, 125.6, 80.3, 77.5, 70.8, 70.0, 66.2, 65.3, 54.1, 51.8, 50.1, 49.9, 48.8, 46.2, 43.4, 40.0; HRMS-ESI  $m/z$  [M–Br]<sup>+</sup> calcd for C<sub>13</sub>H<sub>18</sub>NO<sub>5</sub>S: 300.0900, found: 300.0904.

**(3R,4S)-3-(benzyloxy)-4-((S)-1,2-bis(benzyloxy)ethyl)-1-(3-(2'3'-O-isopropylidene-3-(benzyloxymethyl)uridin-5-yl)propyl)-3-(benzyloxy)-tetrahydro-1H-thiophenium tetrafluoroborate (68):** Using the general procedure for the preparation of sulfonium ions, **21** (80 mg, 0.18 mmol) was reacted with **42** (105 mg, 0.18 mmol) and AgBF<sub>4</sub> (35 mg, 0.18 mmol) to afford the product **68** as a colorless oil (53 mg, 30%):  $R_f$  = 0.45 (CH<sub>3</sub>OH–CH<sub>2</sub>Cl<sub>2</sub>, 9:1);

HRMS-ESI  $m/z$   $[M-BF_4]^+$  calcd for  $C_{50}H_{59}N_2O_{10}S$ : 879.3885, found: 879.3883. The compound used in the next step without further characterization.

**(3R,4S)-3-((S)-1,2-dihydroxyethyl)-4-hydroxy-1-(3-(uridin-5-yl)propyl)-tetrahydro-1H-thiophenium chloride (69):** Using the general procedure for benzyl deprotection, **68** (53 mg, 0.05 mmol) was treated with  $BCl_3$  (1 M in  $CH_2Cl_2$ ) and then Amberlyst ( $Cl^-$  form) to give **69** as a 80:20 inseparable mixture of stereoisomers as a colorless foam (14 mg, 55%):  $R_f$  = 0.05 ( $CH_3OH$ );  $^1H$  NMR (500 MHz,  $CD_3OD$ )  $\delta$  7.87 (d,  $J$  = 8.1 Hz, 0.8H) 7.76 (d,  $J$  = 8.1 Hz, 0.2H), 5.83 (d,  $J$  = 4.1 Hz, 0.8H), 5.82 (d,  $J$  = 4.1 Hz, 0.2H), 5.76 (d,  $J$  = 8.1 Hz, 0.8H), 5.74 (d,  $J$  = 8.1 Hz, 0.2H), 4.73 (dd,  $J$  = 1.8, 2.0 Hz, 0.8H), 4.66 (dd,  $J$  = 5.4, 5.4 Hz, 0.2H), 4.20–4.07 (m, 3H), 3.91–3.37 (m, 13H), 3.03 (m, 0.8H), 2.58 (dddd,  $J$  = 2.4, 5.6, 5.6, 11.1 Hz, 0.2H), 2.20–2.13 (m, 2H);  $^{13}C$  NMR (125 MHz,  $CD_3OD$ )  $\delta$  166.1, 152.3, 142.5, 102.9, 91.5, 84.3, 80.0, 75.3, 71.6, 71.3, 70.9, 70.3, 70.0, 66.1, 65.3, 53.8, 51.6, 50.9, 50.4, 45.2, 43.5, 42.3, 40.8, 27.3, 27.1; HRMS-ESI  $m/z$   $[M-Cl]^+$  calcd for  $C_{18}H_{29}N_2O_9S$ : 449.1588, found: 449.1588.

**(3R,4S)-3-(benzyloxy)-4-((S)-1,2-bis(benzyloxy)ethyl)-1-(3-(2'3'-O-isopropylidene-3-(benzyloxymethyl)uridin-5-yl)butyl)-3-(benzyloxy)-tetrahydro-1H-thiophenium tetrafluoroborate (70):** Using the general procedure for the preparation of sulfonium ions, **21** (70 mg, 0.16 mmol) was reacted with **43** (95 mg, 0.16 mmol) and  $AgBF_4$  (32 mg, 0.16 mmol) to give the **70** as a colorless oil (62 mg, 39%):  $R_f$  = 0.45 ( $CH_3OH-CH_2Cl_2$  9:1); HRMS-ESI  $m/z$   $[M-BF_4]^+$  calcd for  $C_{51}H_{61}N_2O_{10}S$ : 893.4041, found: 893.4042. The compound used in the next step without further characterization.

**(3R,4S)-3-((S)-1,2-dihydroxyethyl)-4-hydroxy-1-(3-(uridin-5-yl)butyl)-tetrahydro-1H-thiophenium chloride (71):** Using the general procedure for the benzyl deprotection, **70** (51 mg, 0.05 mmol) was treated with  $BCl_3$  (1 M in  $CH_2Cl_2$ ) and then Amberlyst ( $Cl^-$  form) to give **71** as a colorless foam as 88:12 ratio of isomers (14 mg, 54%):  $R_f$  = 0.05 ( $CH_3OH$ );  $^1H$

NMR (300 MHz, CD<sub>3</sub>OD)  $\delta$  7.90 (d, 1H,  $J$  = 8.1 Hz), 5.86 (d,  $J$  = 3.6 Hz, 1H), 5.70 (d,  $J$  = 8.1 Hz, 1H), 4.73 (dd,  $J$  = 2.0, 2.3 Hz, 1H), 4.17–4.07 (m, 3H, 3.88 (dd,  $J$  = 1.8, 12.3 Hz, 1H), 3.80–3.73 (m, 2H), 3.66–3.35 (m, 10H), 3.05 (m, 1H), 1.97–1.86 (m, 2H), 1.83–1.75 (m, 2H); <sup>13</sup>C NMR (100 MHz, CD<sub>3</sub>OD)  $\delta$  166.2, 152.3, 142.5, 102.6, 91.2, 84.6, 80.1, 75.7, 71.4, 71.3, 71.1, 70.9, 65.3, 53.9, 50.4, 46.7, 42.9, 29.3, 24.0; HRMS-ESI  $m/z$  [M–Cl]<sup>+</sup> calcd for C<sub>19</sub>H<sub>31</sub>N<sub>2</sub>O<sub>9</sub>S: 463.1745, found: 463.1742.

## References

- S1 S. Mohan, L. Sim, D. R. Rose and B. M. Pinto, *Carbohydr. Res.*, 2007, **342**, 901–912.
- S2 R. Wang, D. H. Steensma, Y. Takaoka, J. W. Yun, T. Kajimoto and C. H. Wong, *Bioorg. Med. Chem.*, 1997, **5**, 661–672.

500 MHz 1D in CDCl<sub>3</sub> (ref. to CDCl<sub>3</sub> @ 7.26 ppm), temp 26.1 C -> actual temp = 27.0 C, autoxddd probe  
Pulse Sequence: s2pml

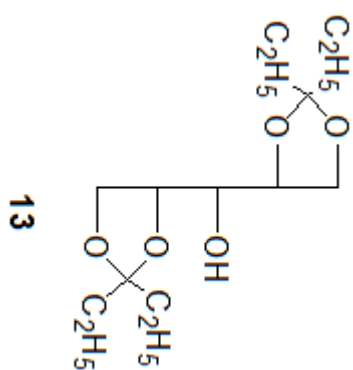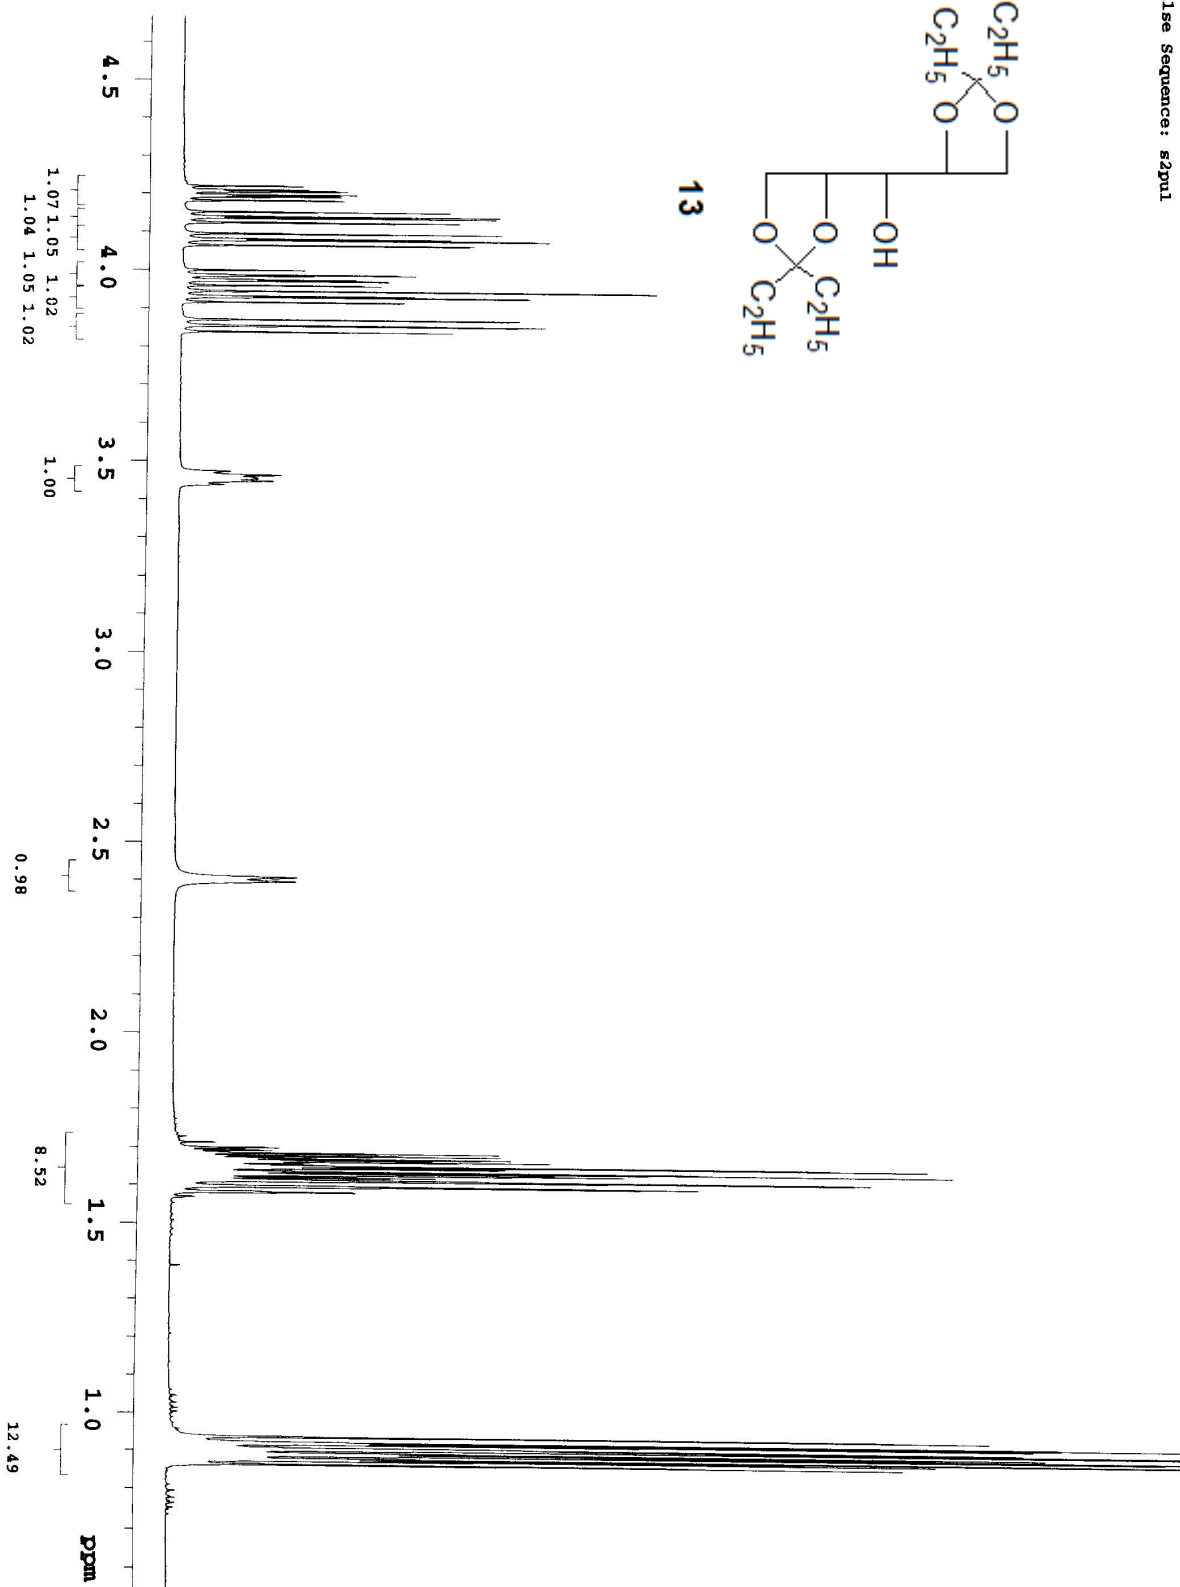

125 MHz APF in CDCl<sub>3</sub> (ref. to CDCl<sub>3</sub> @ 77.0 ppm), temp 26.1 C -> actual temp = 27.0 C, autoxdrb probe  
 C & CH<sub>2</sub> same, CH & CH<sub>3</sub> opposite side of solvent signal  
 Pulse Sequence: apt

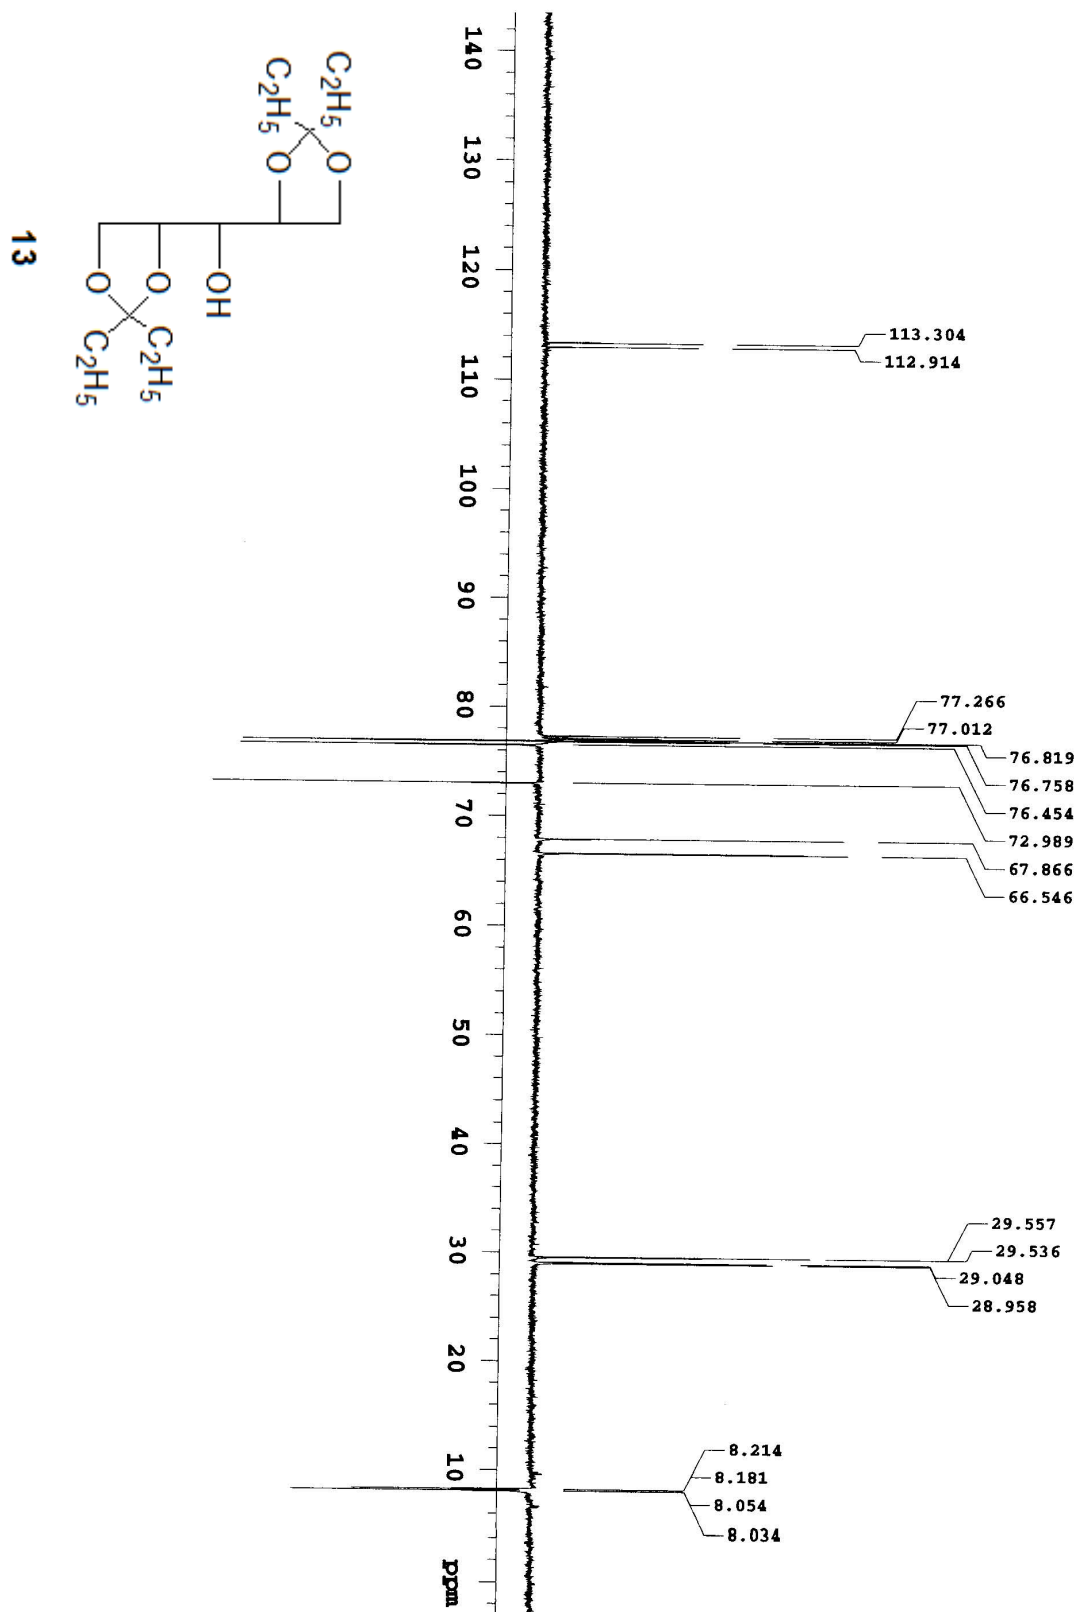

400 MHz 1D in CDCl<sub>3</sub> (ref. to CDCl<sub>3</sub> @ 7.26 ppm), temp 26.5 C -> actual temp = 27.0 C, autoexd probe  
Pulse Sequence: s2pul1

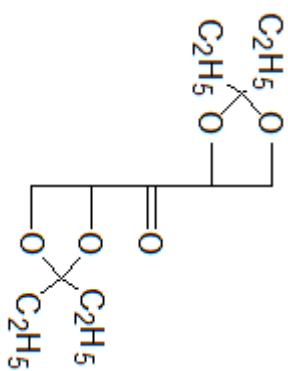

14

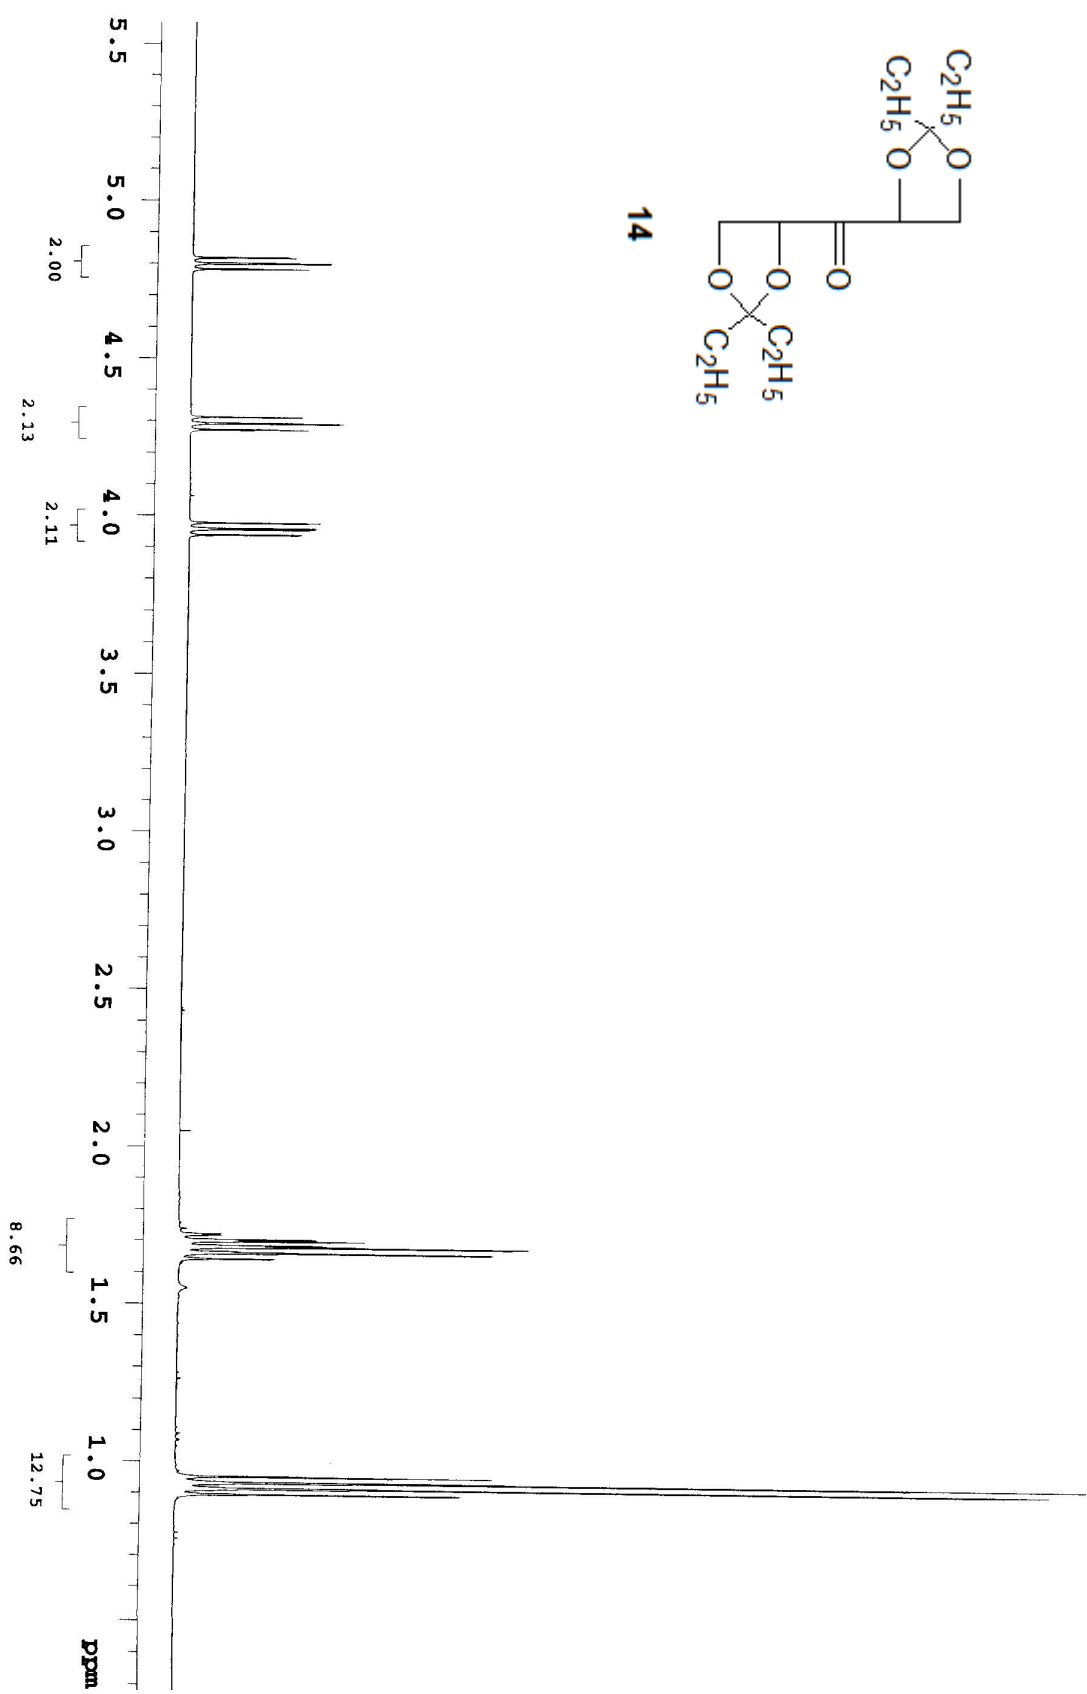

100 MHz APV in CDCl<sub>3</sub> (ref. to CDCl<sub>3</sub> @ 77.0 ppm), temp 26.5 °C -> actual temp = 27.0 °C, autoknob probe  
 C & CH2 same, CH & CH3 opposite side of solvent signal  
 Pulse Sequence: apc

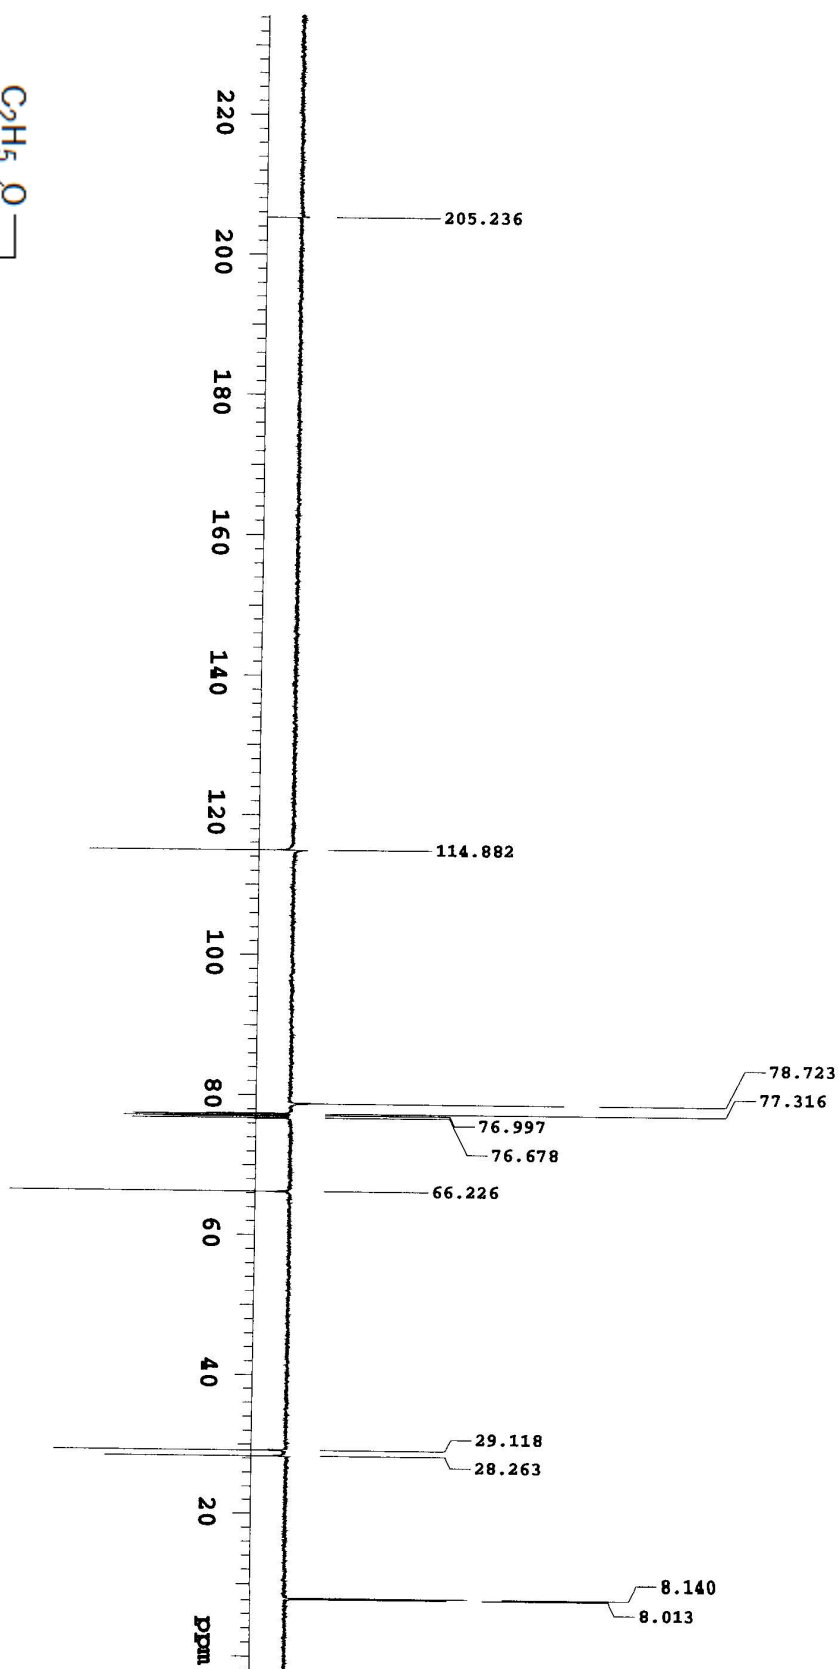

500 MHz <sup>1</sup>H NMR in CDCl<sub>3</sub> (ref. to CDCl<sub>3</sub> @ 7.26 ppm), temp 26.1 C -> actual temp = 27.0 C, autoxchg probe  
Pulse Sequence: s2pu1

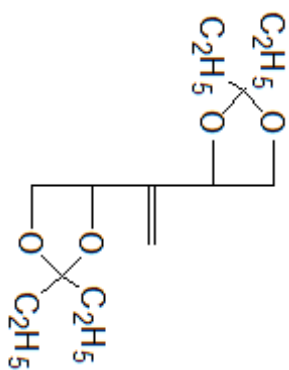

15

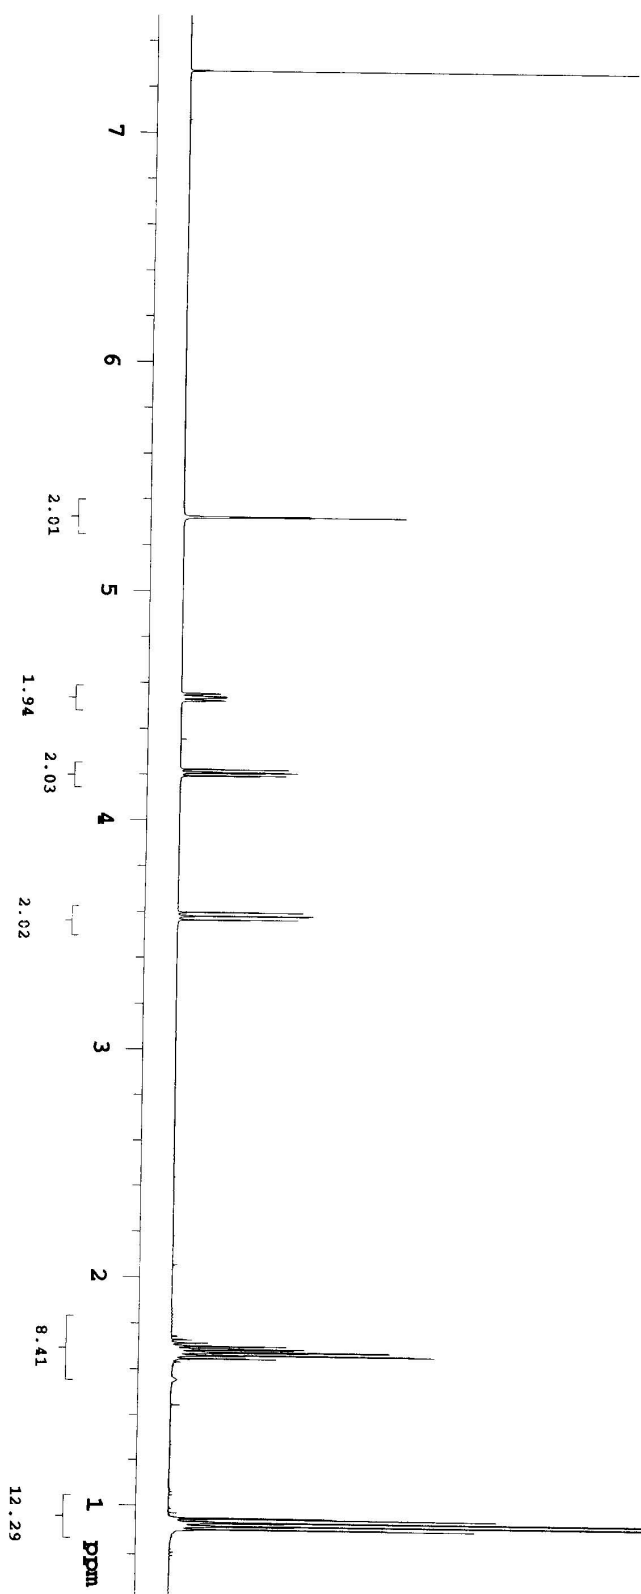



143 MHz APV in CDCl<sub>3</sub> (ref. to CDCl<sub>3</sub> @ 77.0 ppm), temp 26.1 C -> actual temp = 27.0 C, autoxzb probe  
 C & CH2 same, CH & CH3 opposite side of solvent signal  
 Pulse Sequence: apt

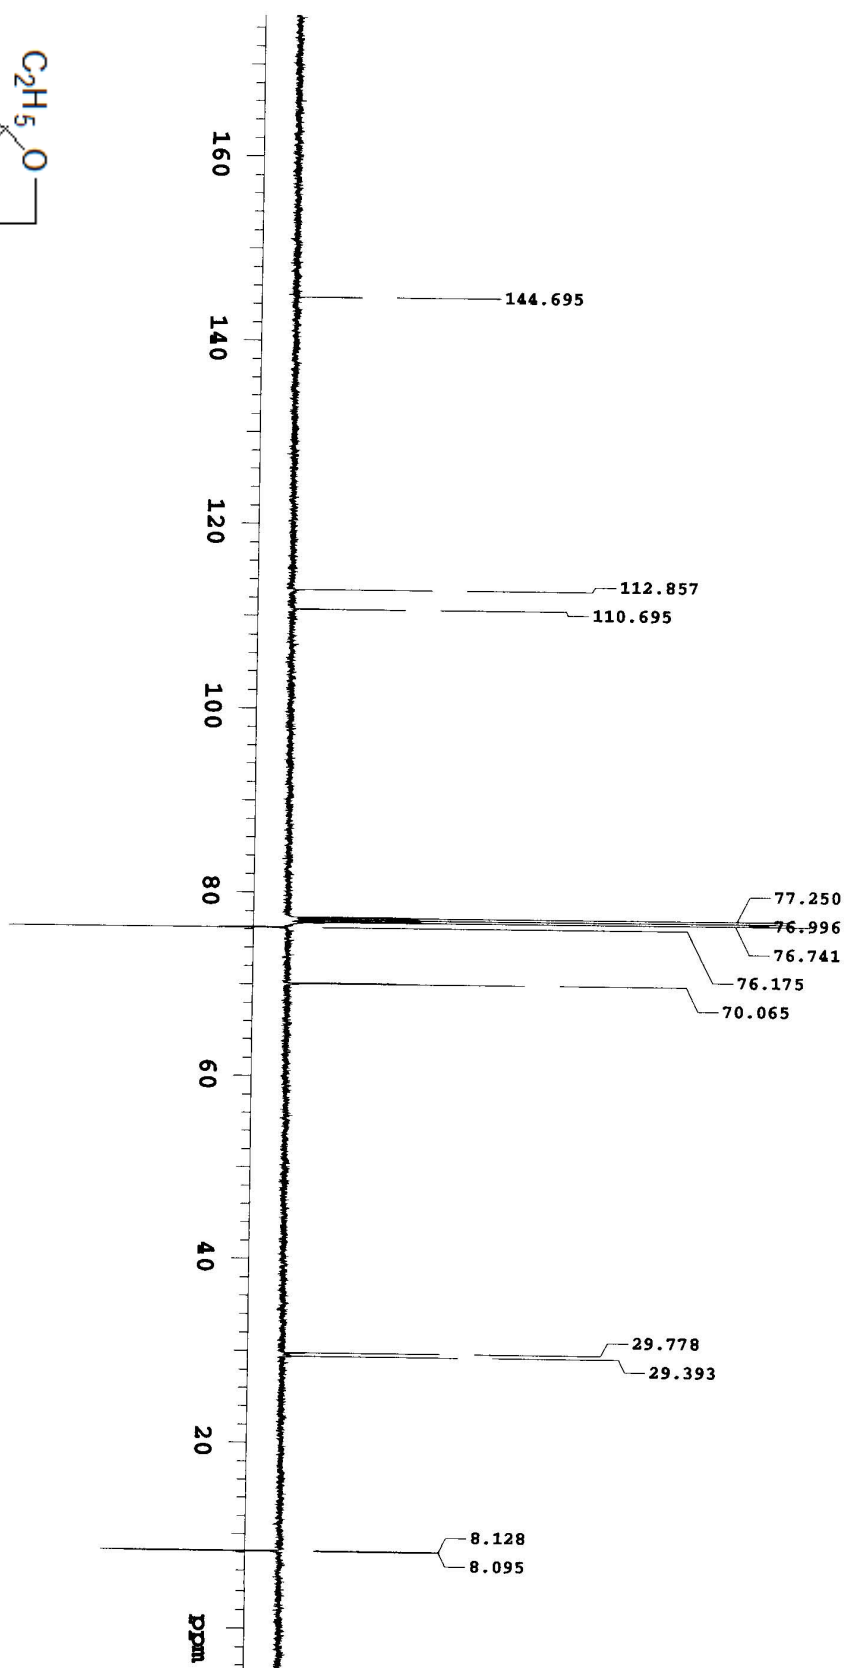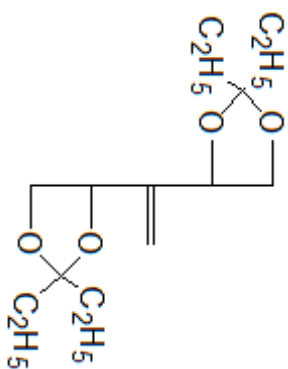

15

400 MHz 1D in CD3OD (ref. to CD3OD @ 3.30 ppm), temp 26.5 C -> actual temp = 27.0 C, autoxkb probe  
Pulse Sequence: s2pul1

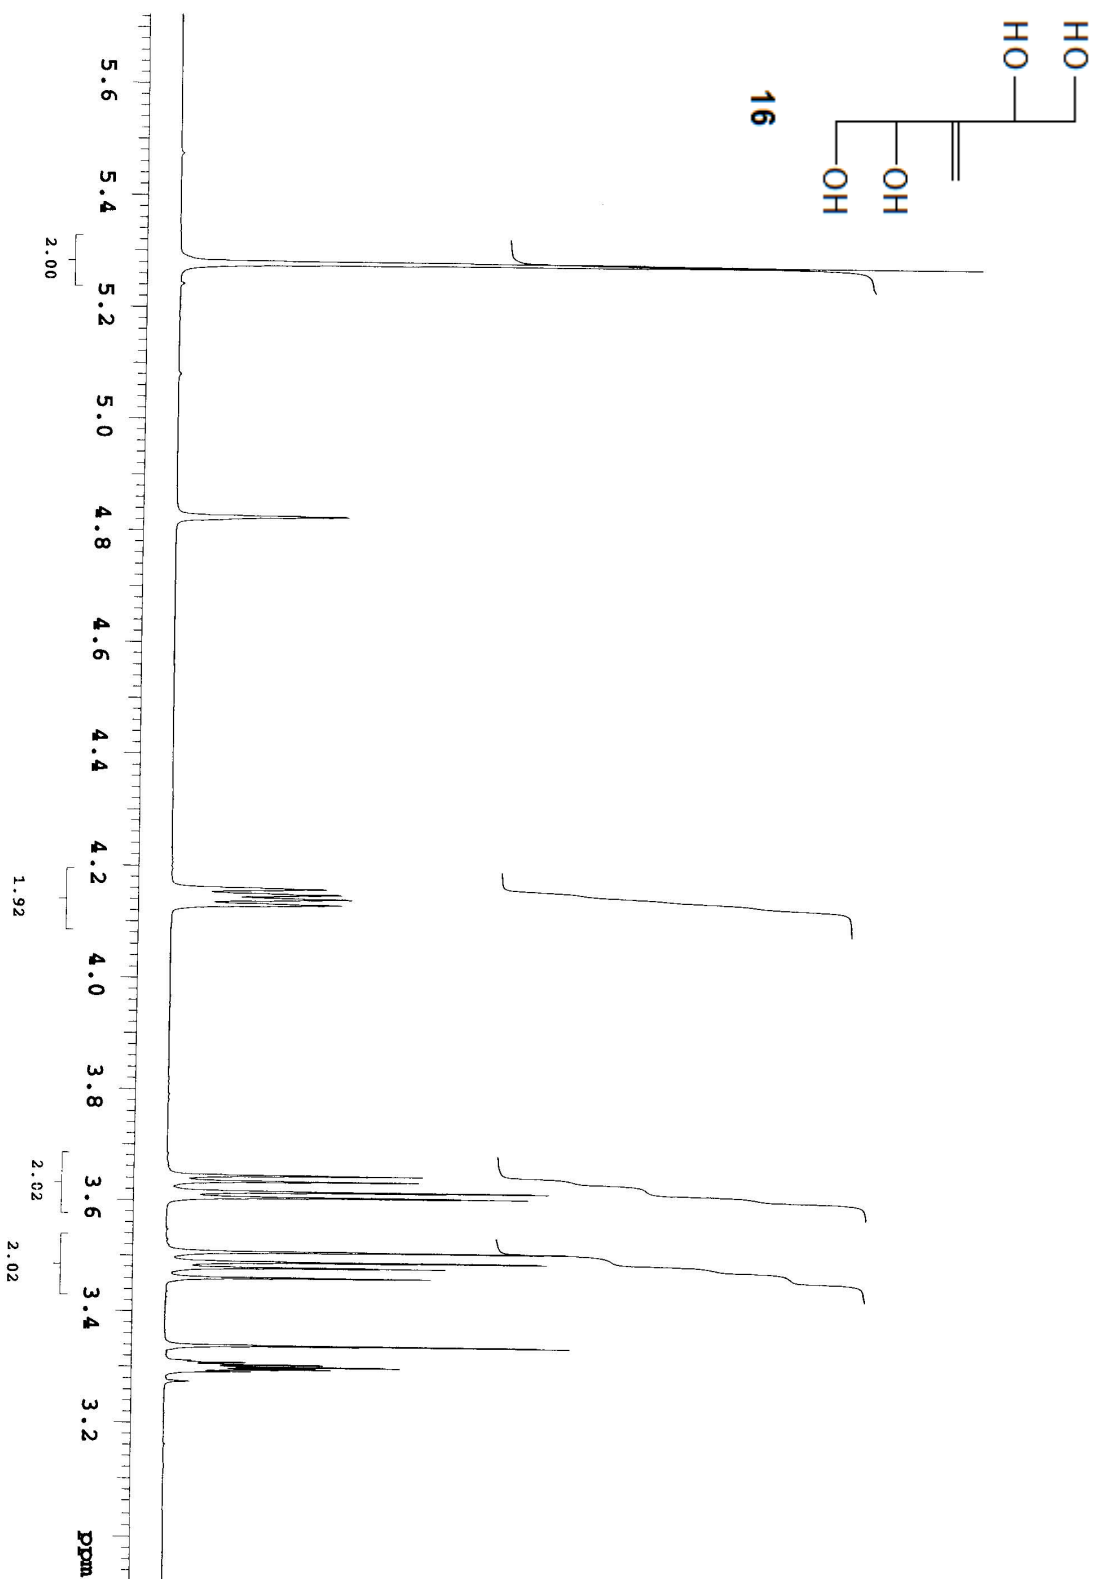

125 MHz APF in CD3OD (ref. to CD3OD @ 49.0 ppm), temp 27.2 C -> actual temp = 27.0 C, sw probe  
C & CH2 same, CH & CH3 opposite side of solvent signal  
Pulse Sequence: apf

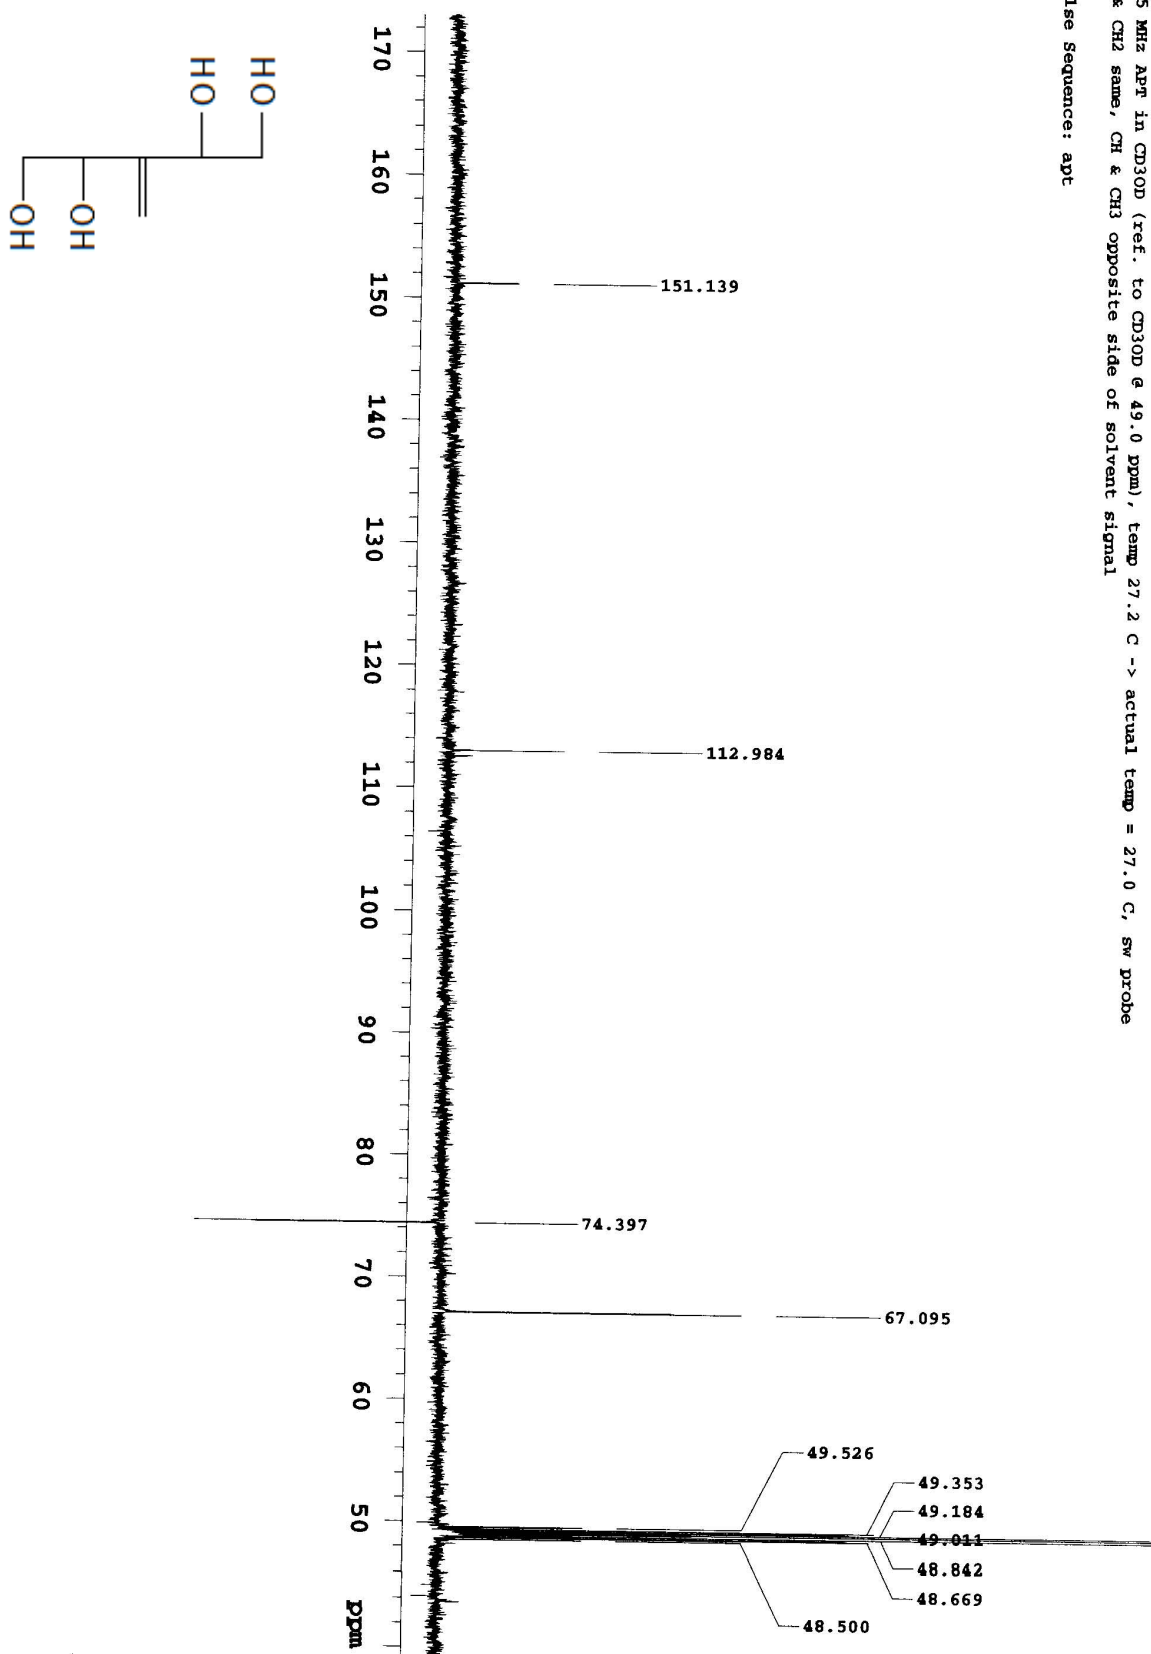

16

uv run in CD3OD (ref. to CD3OD @ 3.30 ppm), temp 26.5 C -> actual temp = 27.0 C, autoxdb probe  
Pulse Sequence: szgm1

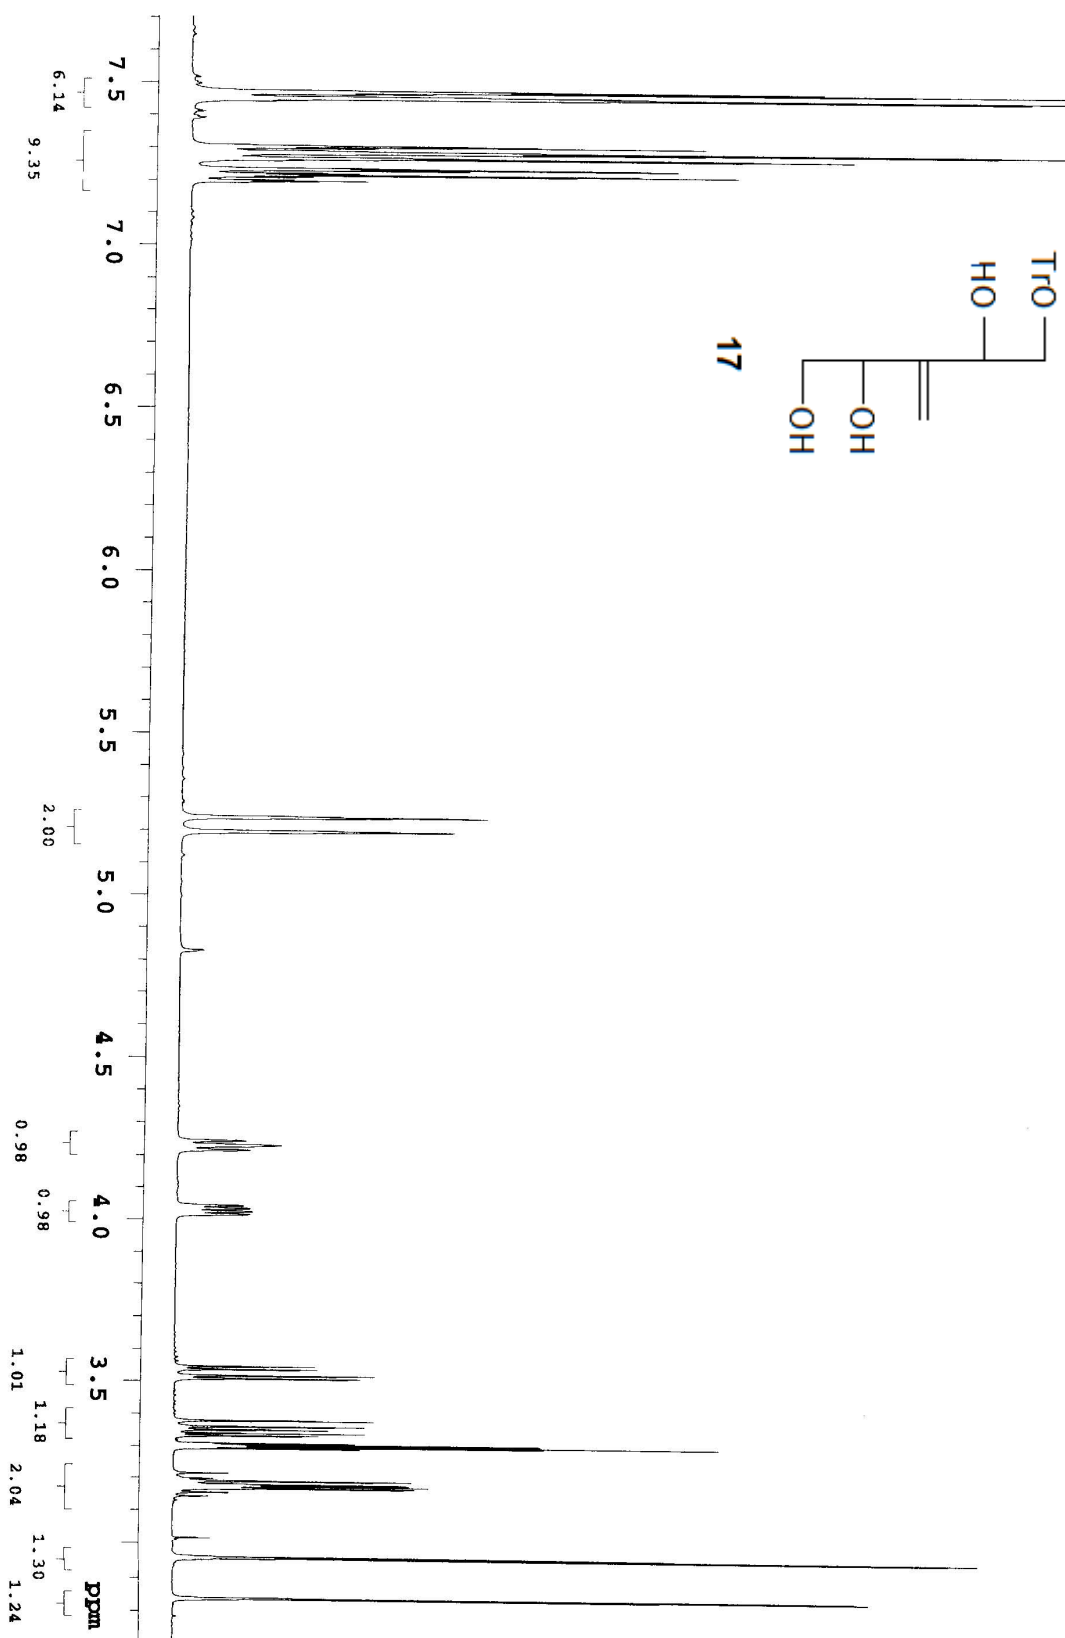

Chemical structure of compound 17 is shown in the top right corner. The structure is a substituted cyclohexane ring with a hydroxyl group (OH) and a methoxy group (OCH<sub>3</sub>) at the 1-position, and a hydroxyl group (OH) and a methoxy group (OCH<sub>3</sub>) at the 4-position. The chemical shift of the methoxy carbons is 17.0 ppm.

The <sup>13</sup>C NMR spectrum shows the following chemical shifts (ppm):

| Chemical Shift (ppm) |
|----------------------|
| 17.0                 |
| 151.237              |
| 145.506              |
| 129.969              |
| 128.799              |
| 128.120              |
| 112.706              |
| 88.165               |
| 74.265               |
| 72.817               |
| 69.249               |
| 67.163               |
| 49.683               |
| 49.470               |
| 49.254               |
| 49.041               |
| 48.832               |
| 48.615               |
| 48.403               |

300 MHz 1H in CDCl3 (ref. to CDCl3 @ 7.26 ppm), temp 26.1 C -> actual temp = 27.0 C, autoxkb probe  
Pulse Sequence: s2pul

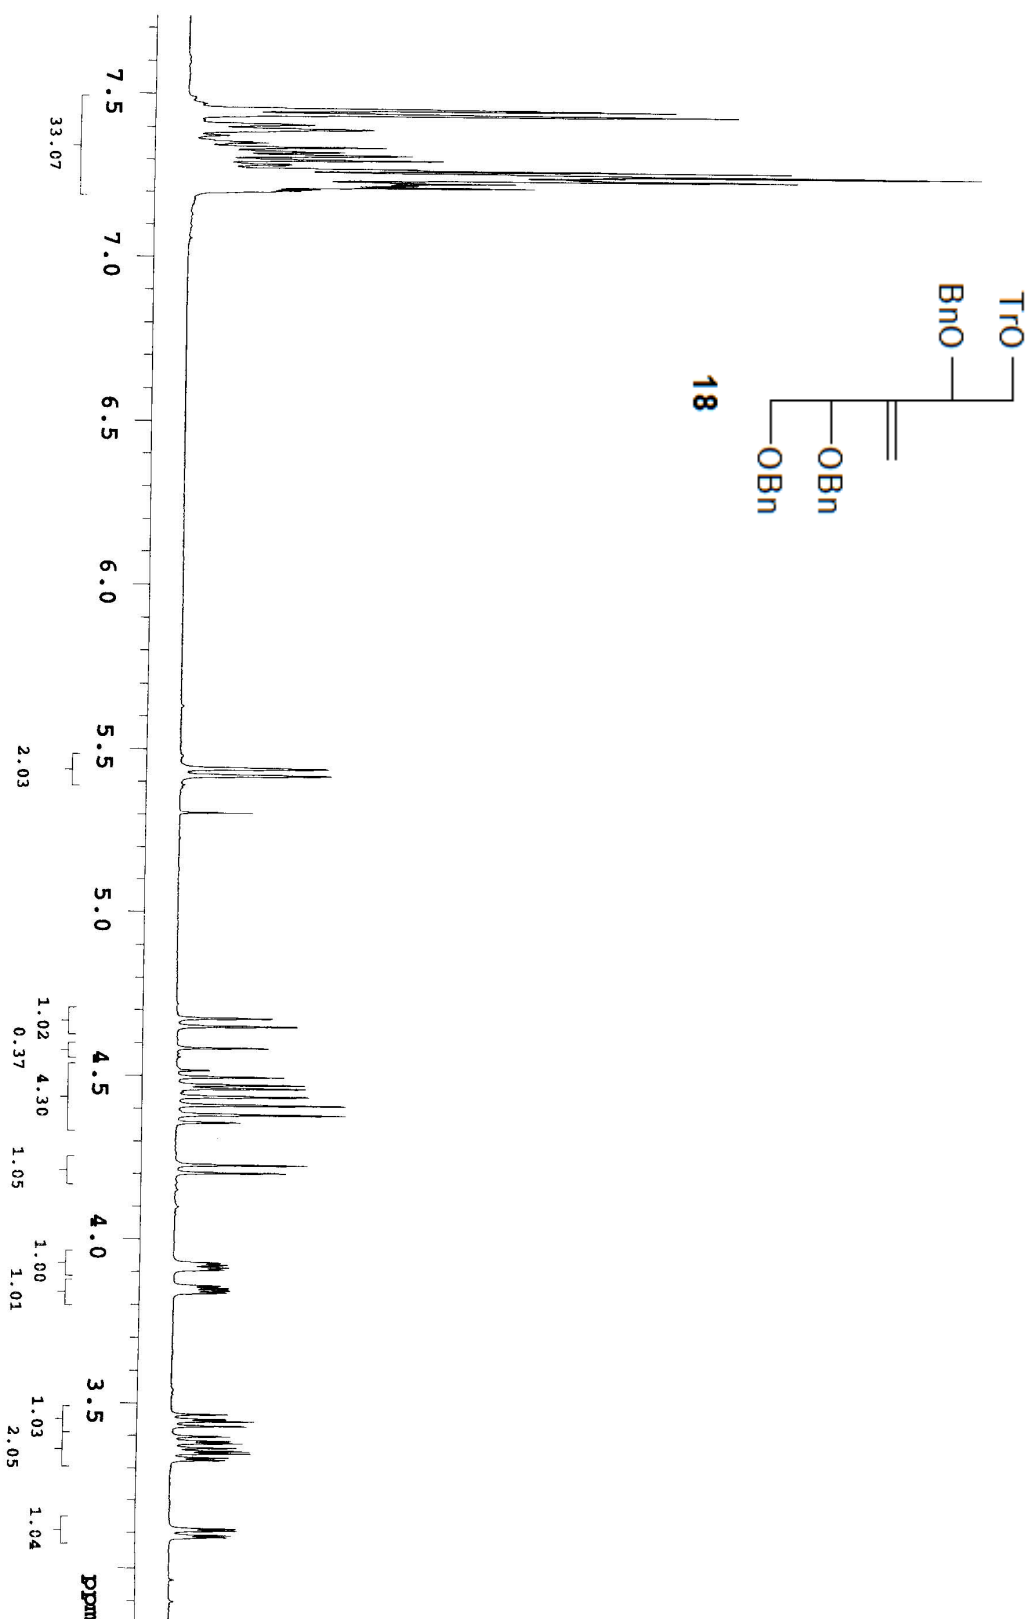

1800 MHz NMR in CDCl<sub>3</sub> (ref. to CDCl<sub>3</sub> @ 77.0 ppm), temp 26.1 C -> actual temp = 27.0 C, autoxtdb probe  
 C & CH2 same, CH & CH3 opposite side of solvent signal  
 Pulse Sequence: apt

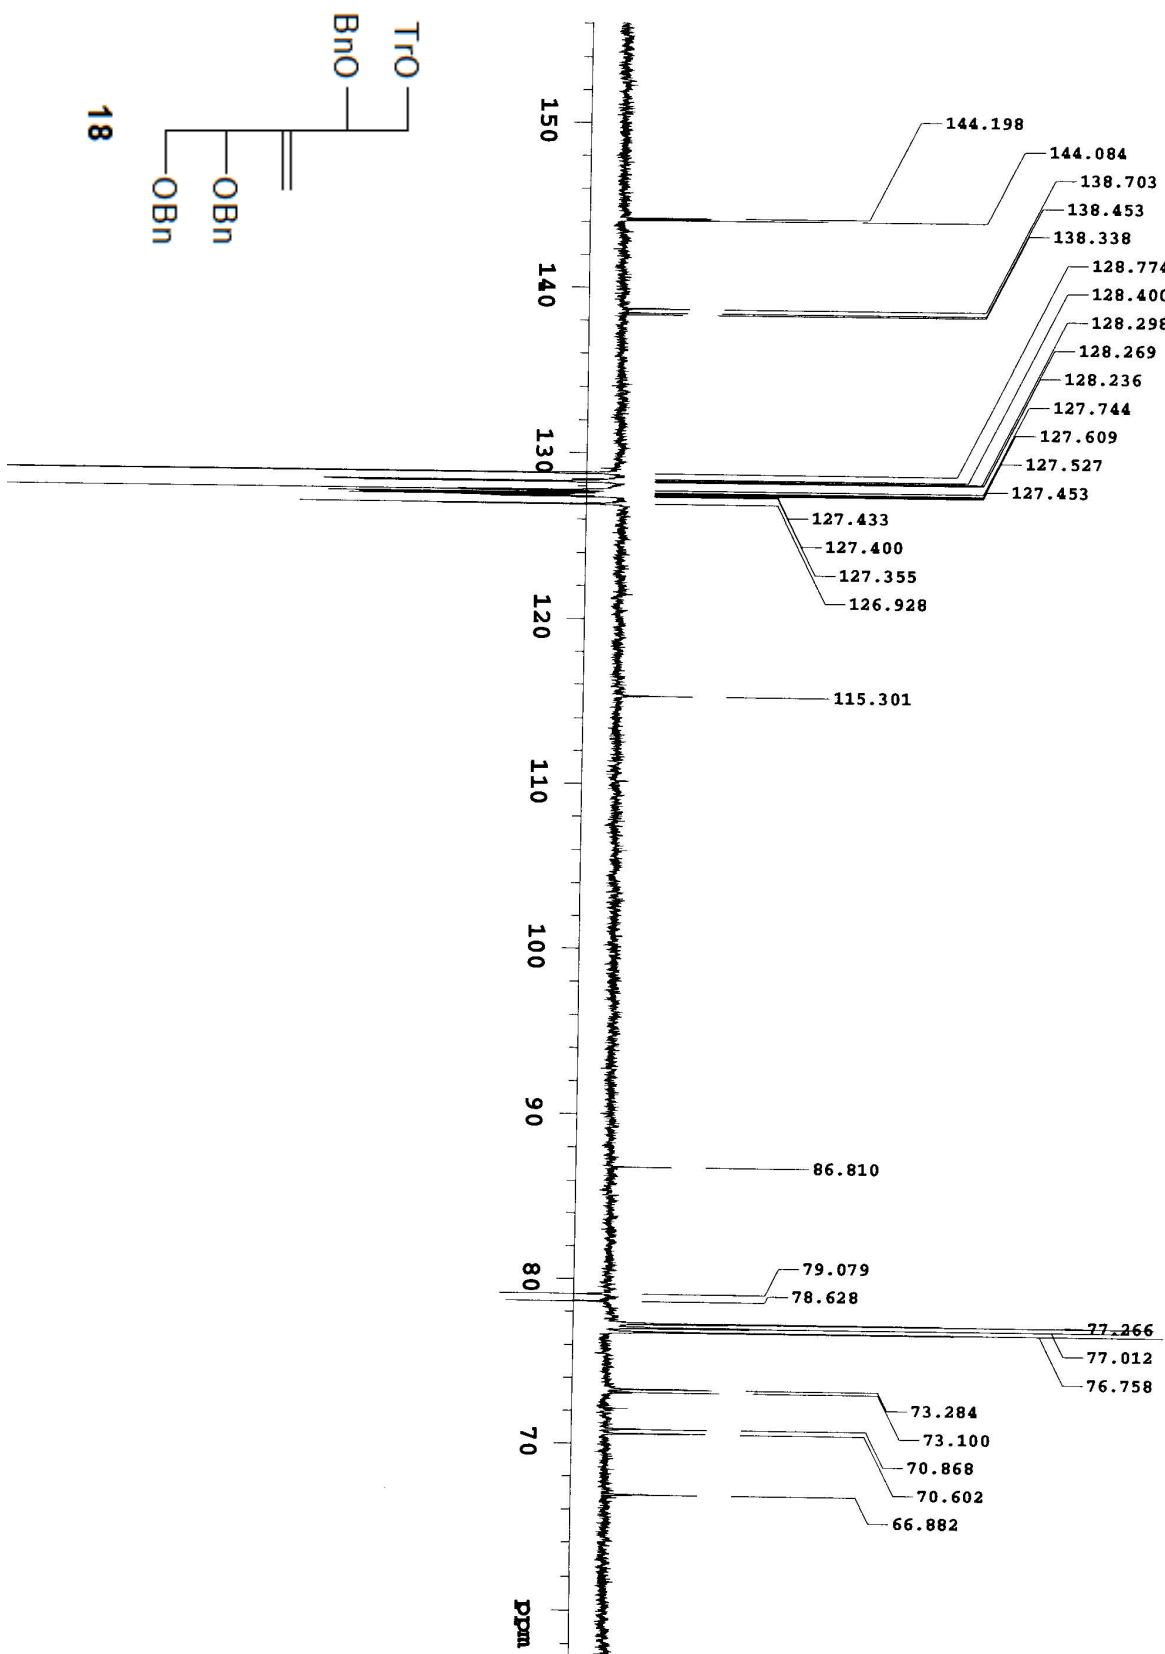

500 MHz 1D in CDCl<sub>3</sub> (ref. to CDCl<sub>3</sub> @ 7.26 ppm), temp 26.1 C -> actual temp = 27.0 C, autowdh probe  
Pulse Sequence: s2pu1

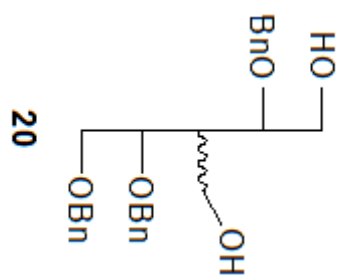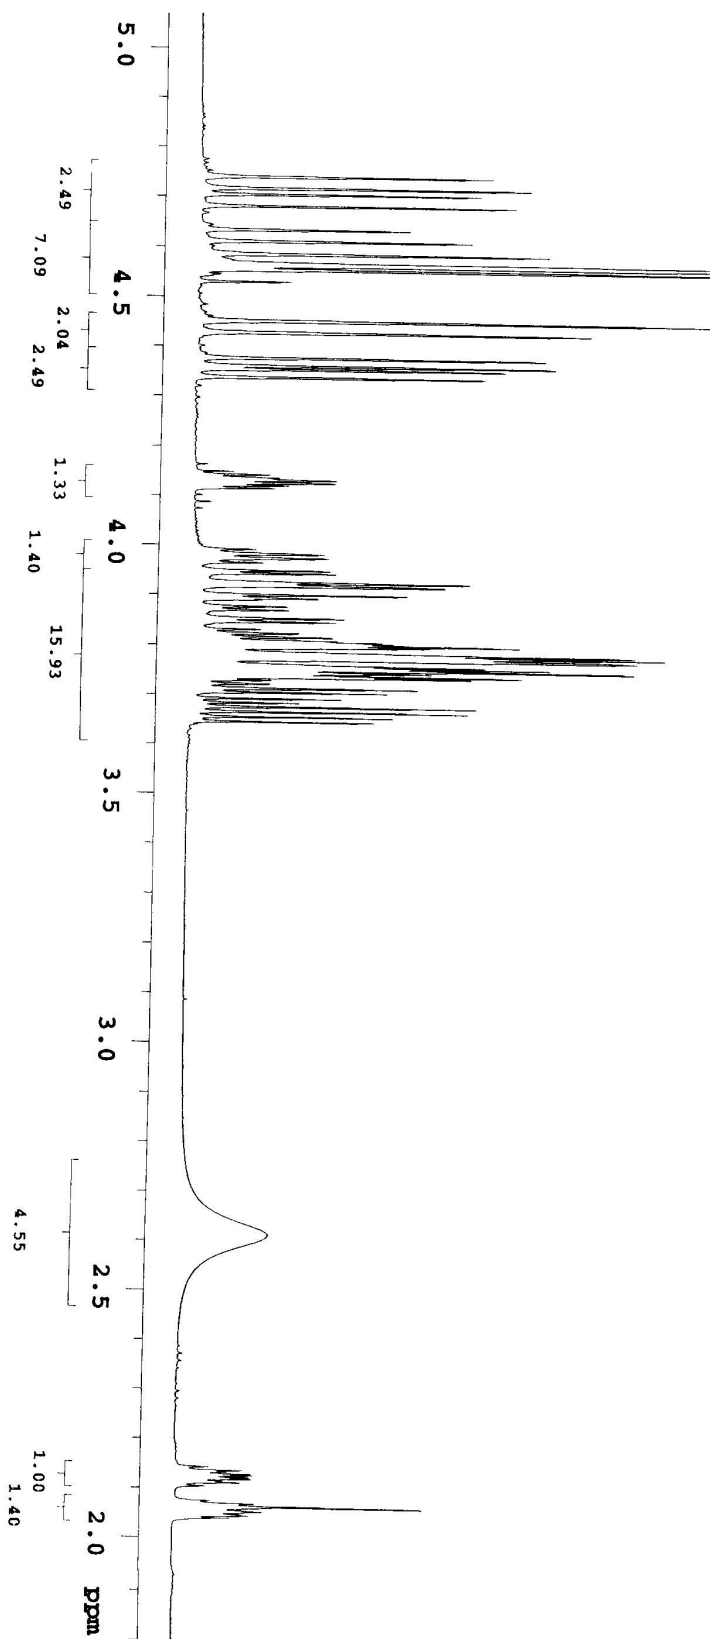



125 MHz APt in CDCl<sub>3</sub> (ref. to CDCl<sub>3</sub> @ 77.0 ppm), temp 26.1 C -> actual temp = 27.0 C, autoxrd probe  
 C & CH<sub>2</sub> same, CH & CH<sub>3</sub> opposite side of solvent signal  
 Pulse Sequence: apt

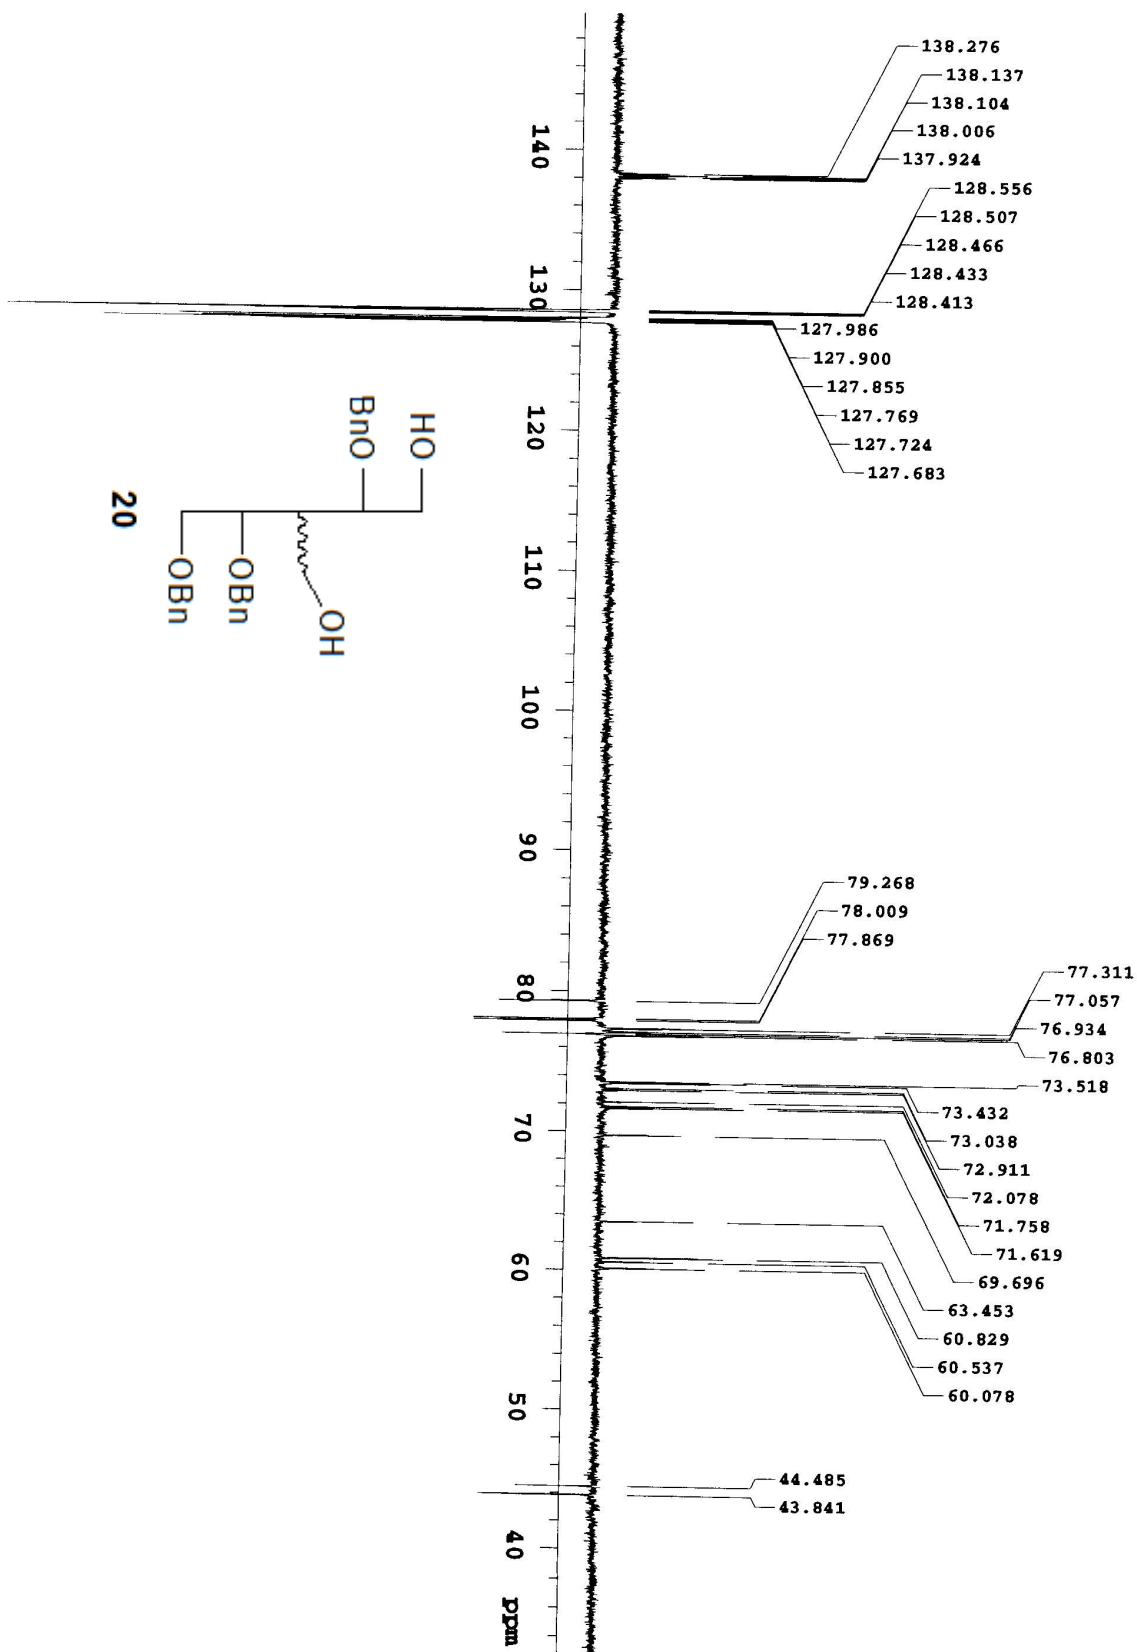

500 MHz 1D in CDCl<sub>3</sub> (ref. to CDCl<sub>3</sub> @ 7.26 ppm), temp 27.2 C -> actual temp = 27.0 C, sw500 probe  
Pulse Sequence: szpul

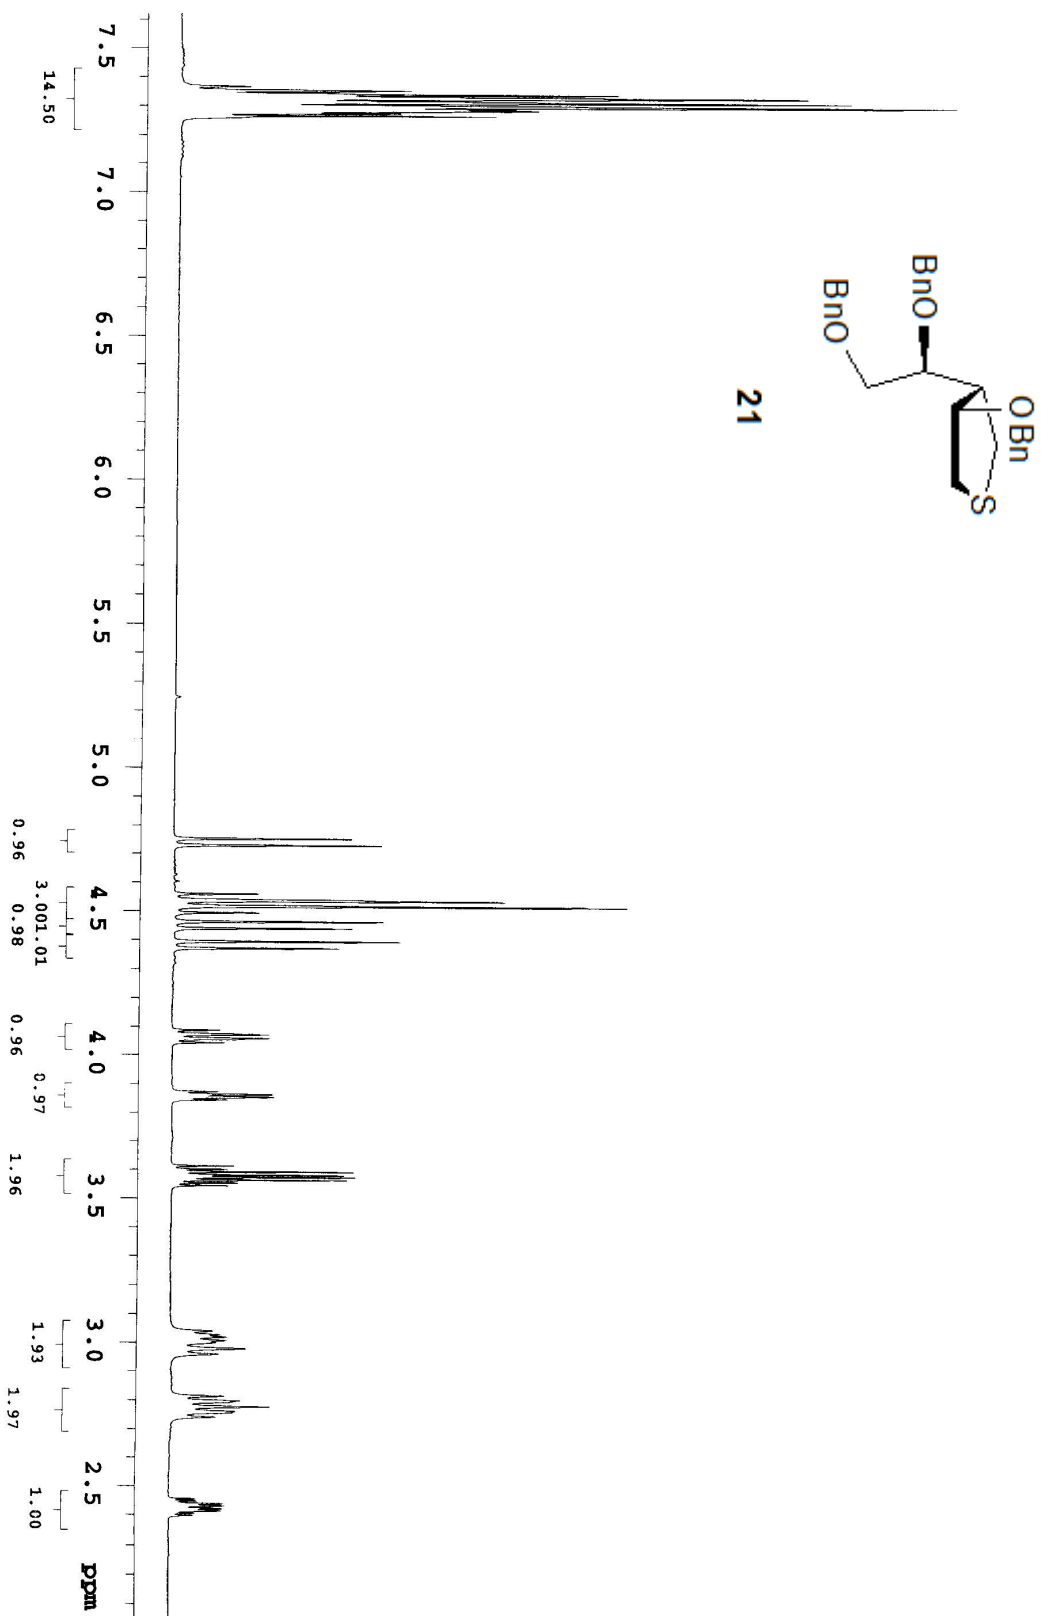

<sup>125</sup> MHz APT in CDCl<sub>3</sub> (ref. to CDCl<sub>3</sub> @ 77.0 ppm), temp 27.2 C -> actual temp = 27.0 C, sw probe C & CH<sub>2</sub> same, CH & CH<sub>3</sub> opposite side of solvent signal

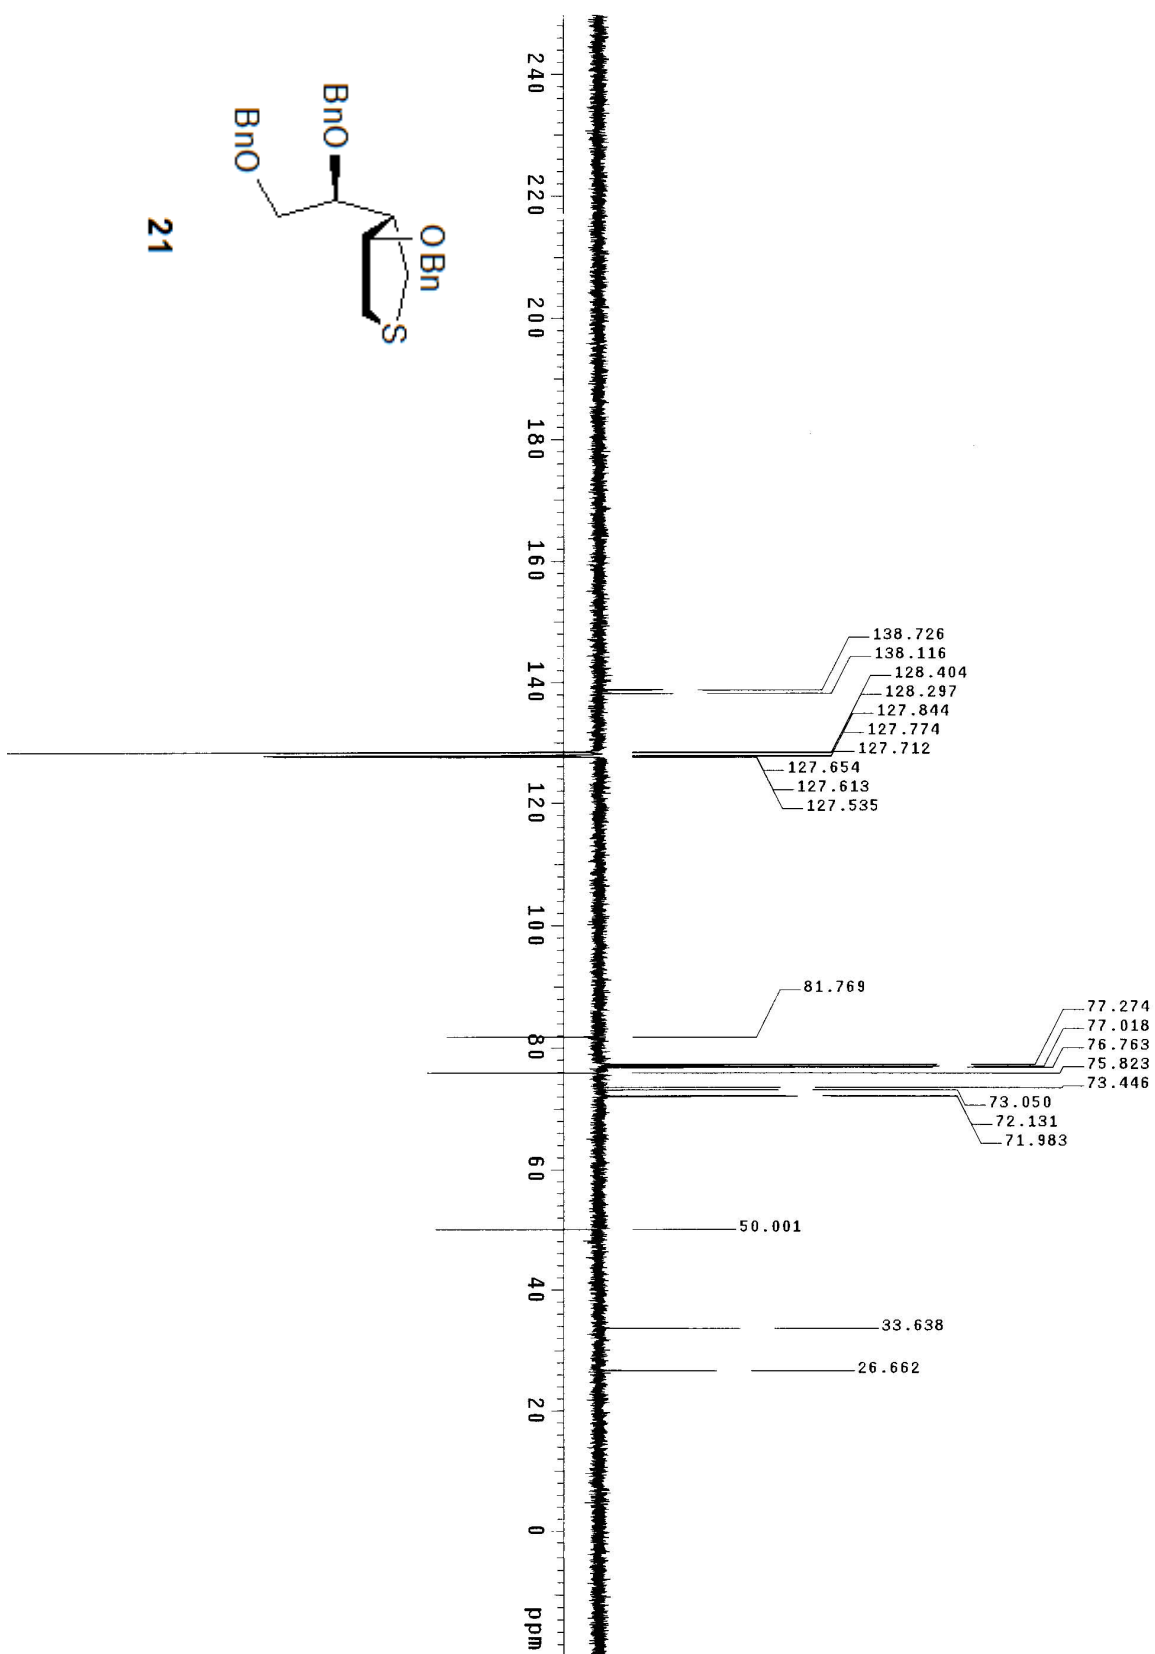

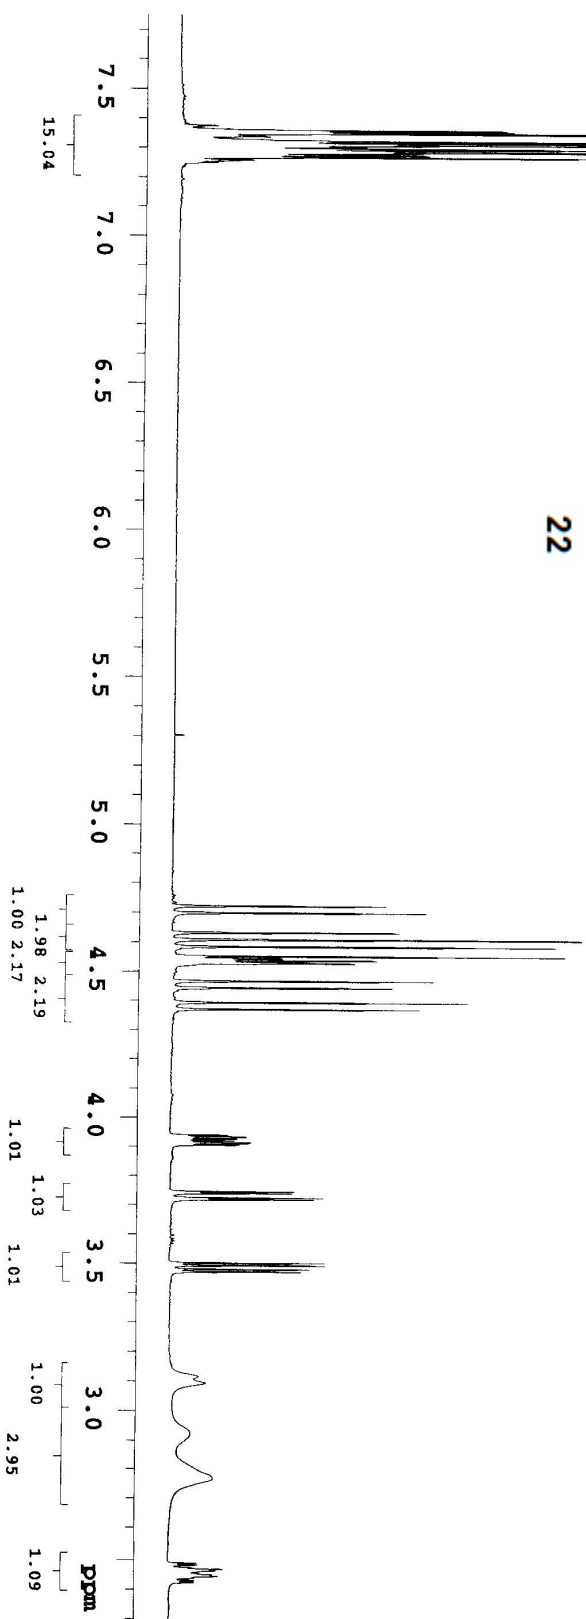

125 MHzAPT in CDCl<sub>3</sub> (ref. to CDCl<sub>3</sub> @ 77.0 ppm), temp 27.2 C -> actual temp = 27.0 C, sw probe C & CH<sub>2</sub> same, CH & CH<sub>3</sub> opposite side of solvent signal  
Pulse Sequence: apt

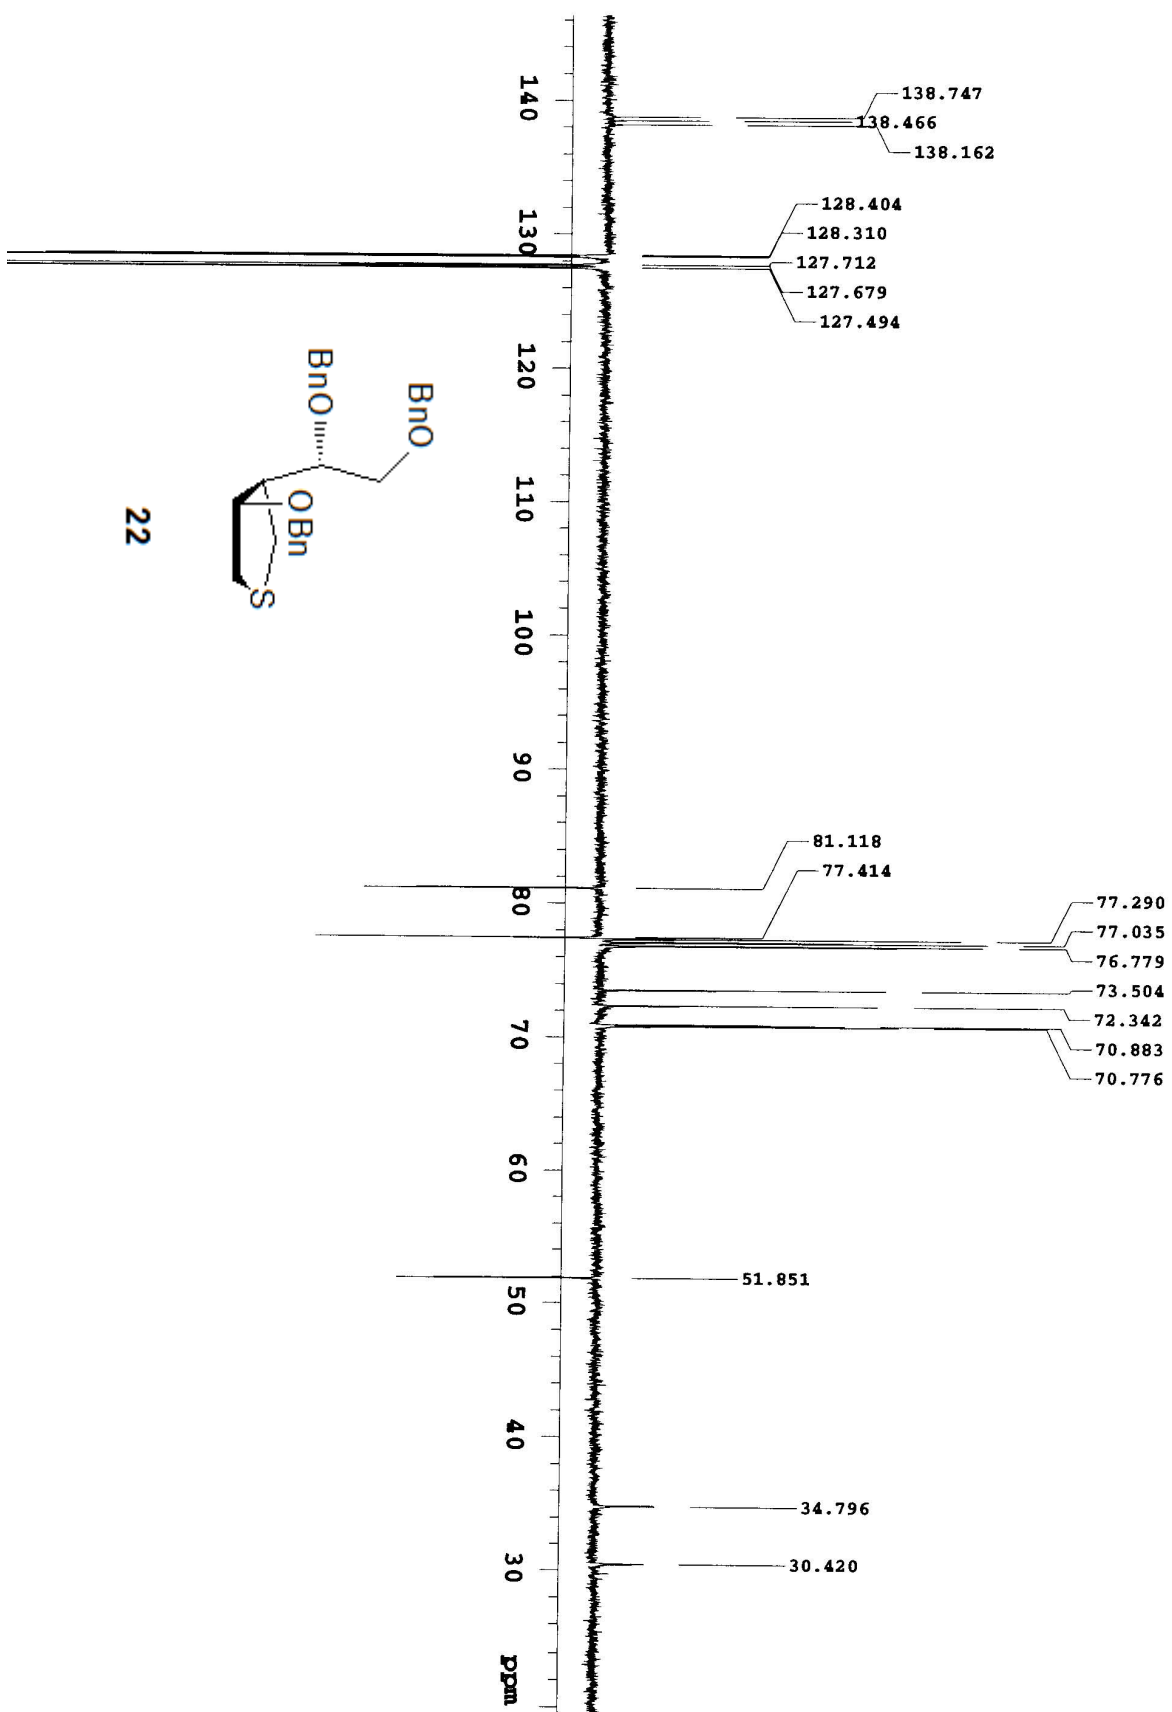

500 MHz 1D in CDCl<sub>3</sub> (ref. to CDCl<sub>3</sub> @ 7.26 ppm), temp 26.1 C -> actual temp = 27.0 C, sw500u probe  
Pulse Sequence: s2gpi1

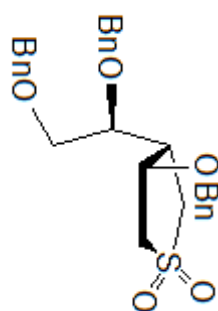

25

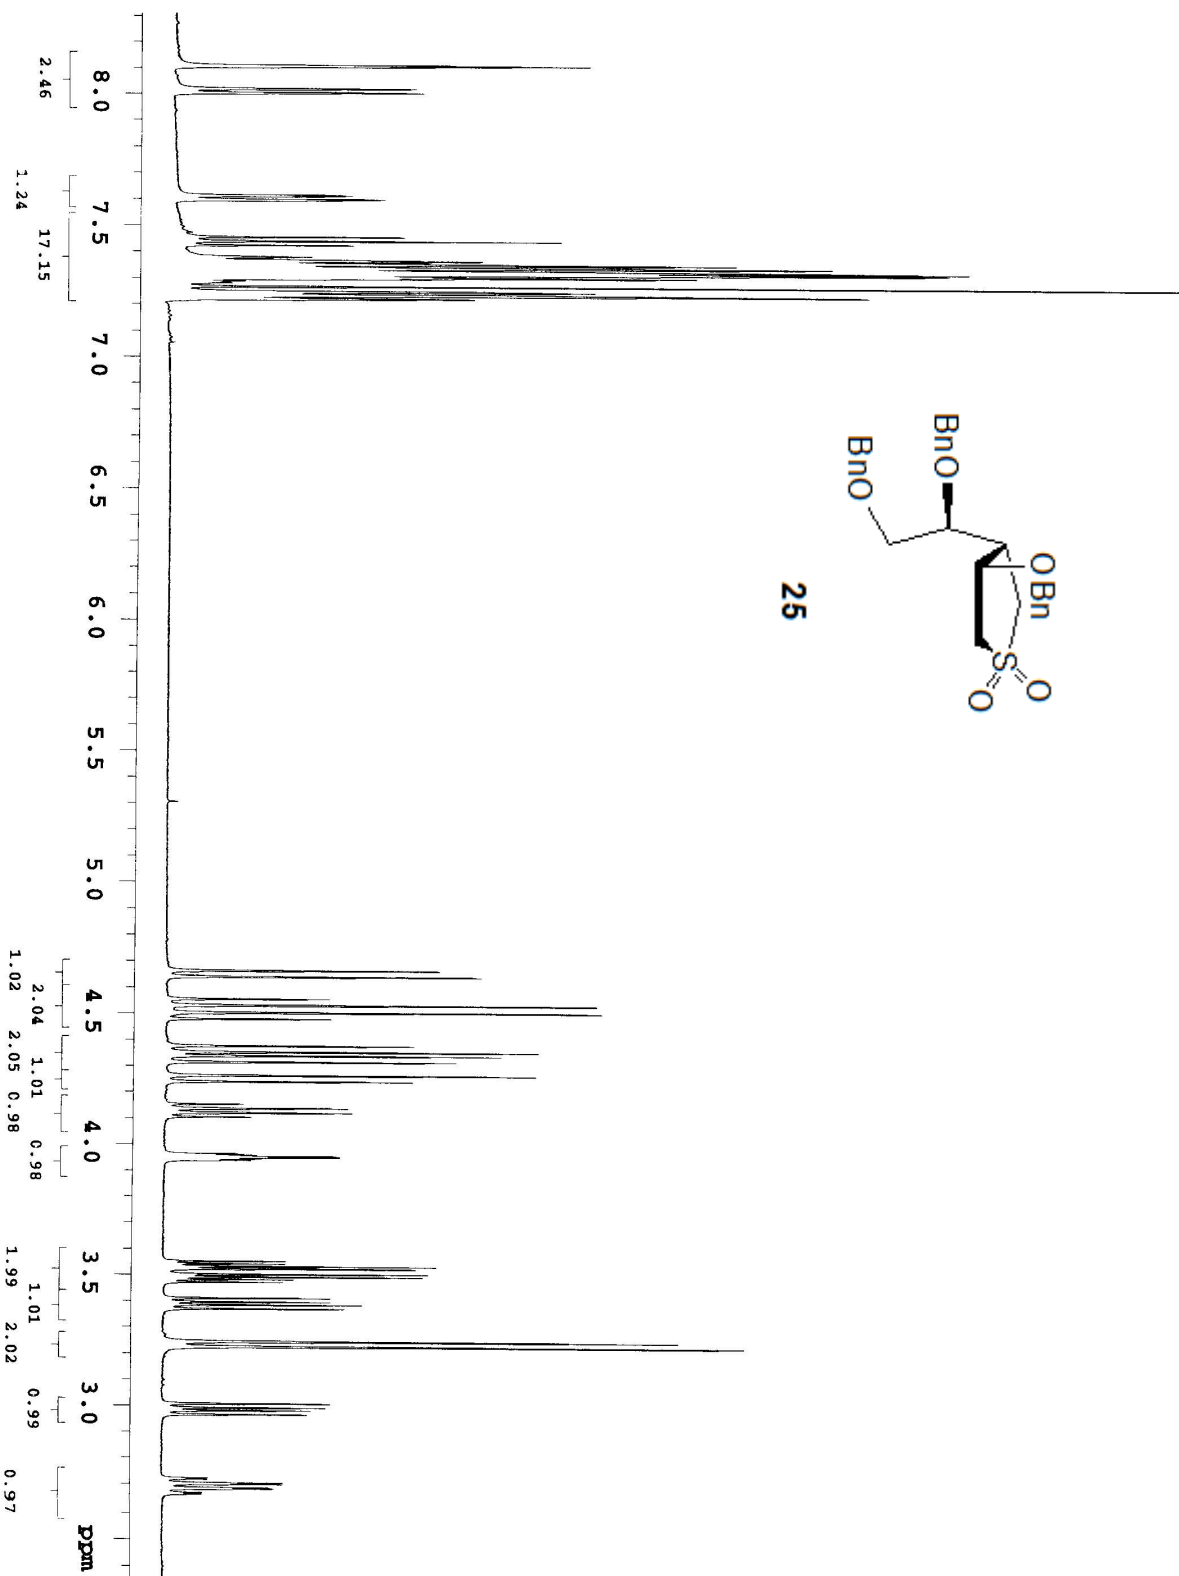

Pulse Sequence: apt

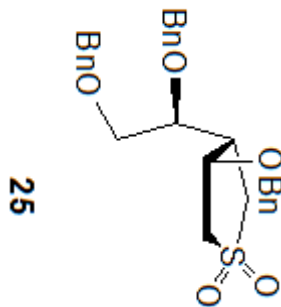

400 MHz 1D in CDCl<sub>3</sub> (ref. to CDCl<sub>3</sub> @ 7.26 ppm), temp 26.5 C -> actual temp = 27.0 C, autoxdrb probe  
Pulse Sequence: s2pu1

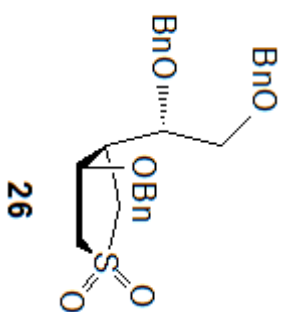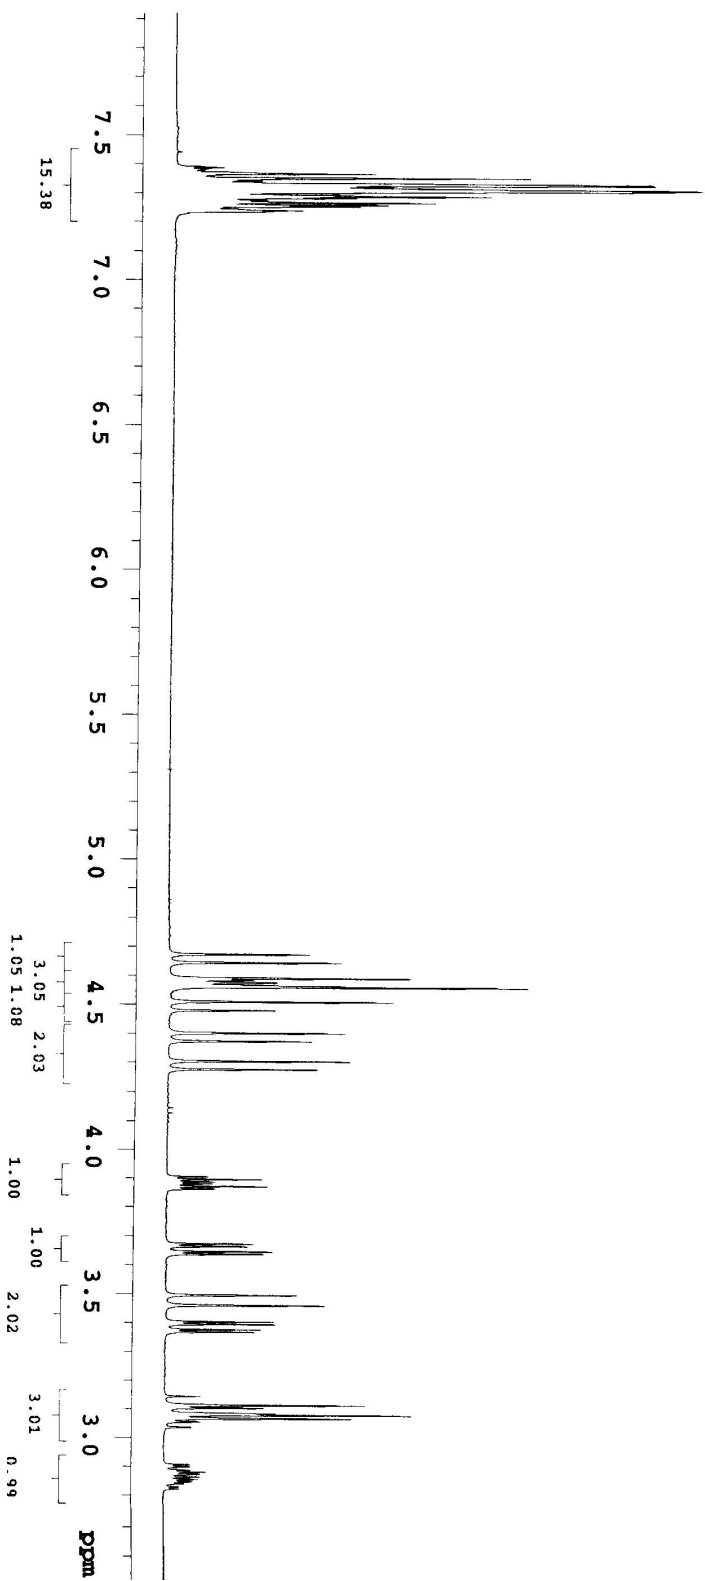



125 MHz APF in CDCl<sub>3</sub> (ref. to CDCl<sub>3</sub> @ 77.0 ppm), temp 27.2 C -> actual temp = 27.0 C, sw probe  
C & CH<sub>2</sub> same, CH & CH<sub>3</sub> opposite side of solvent signal  
Pulse Sequence: apt

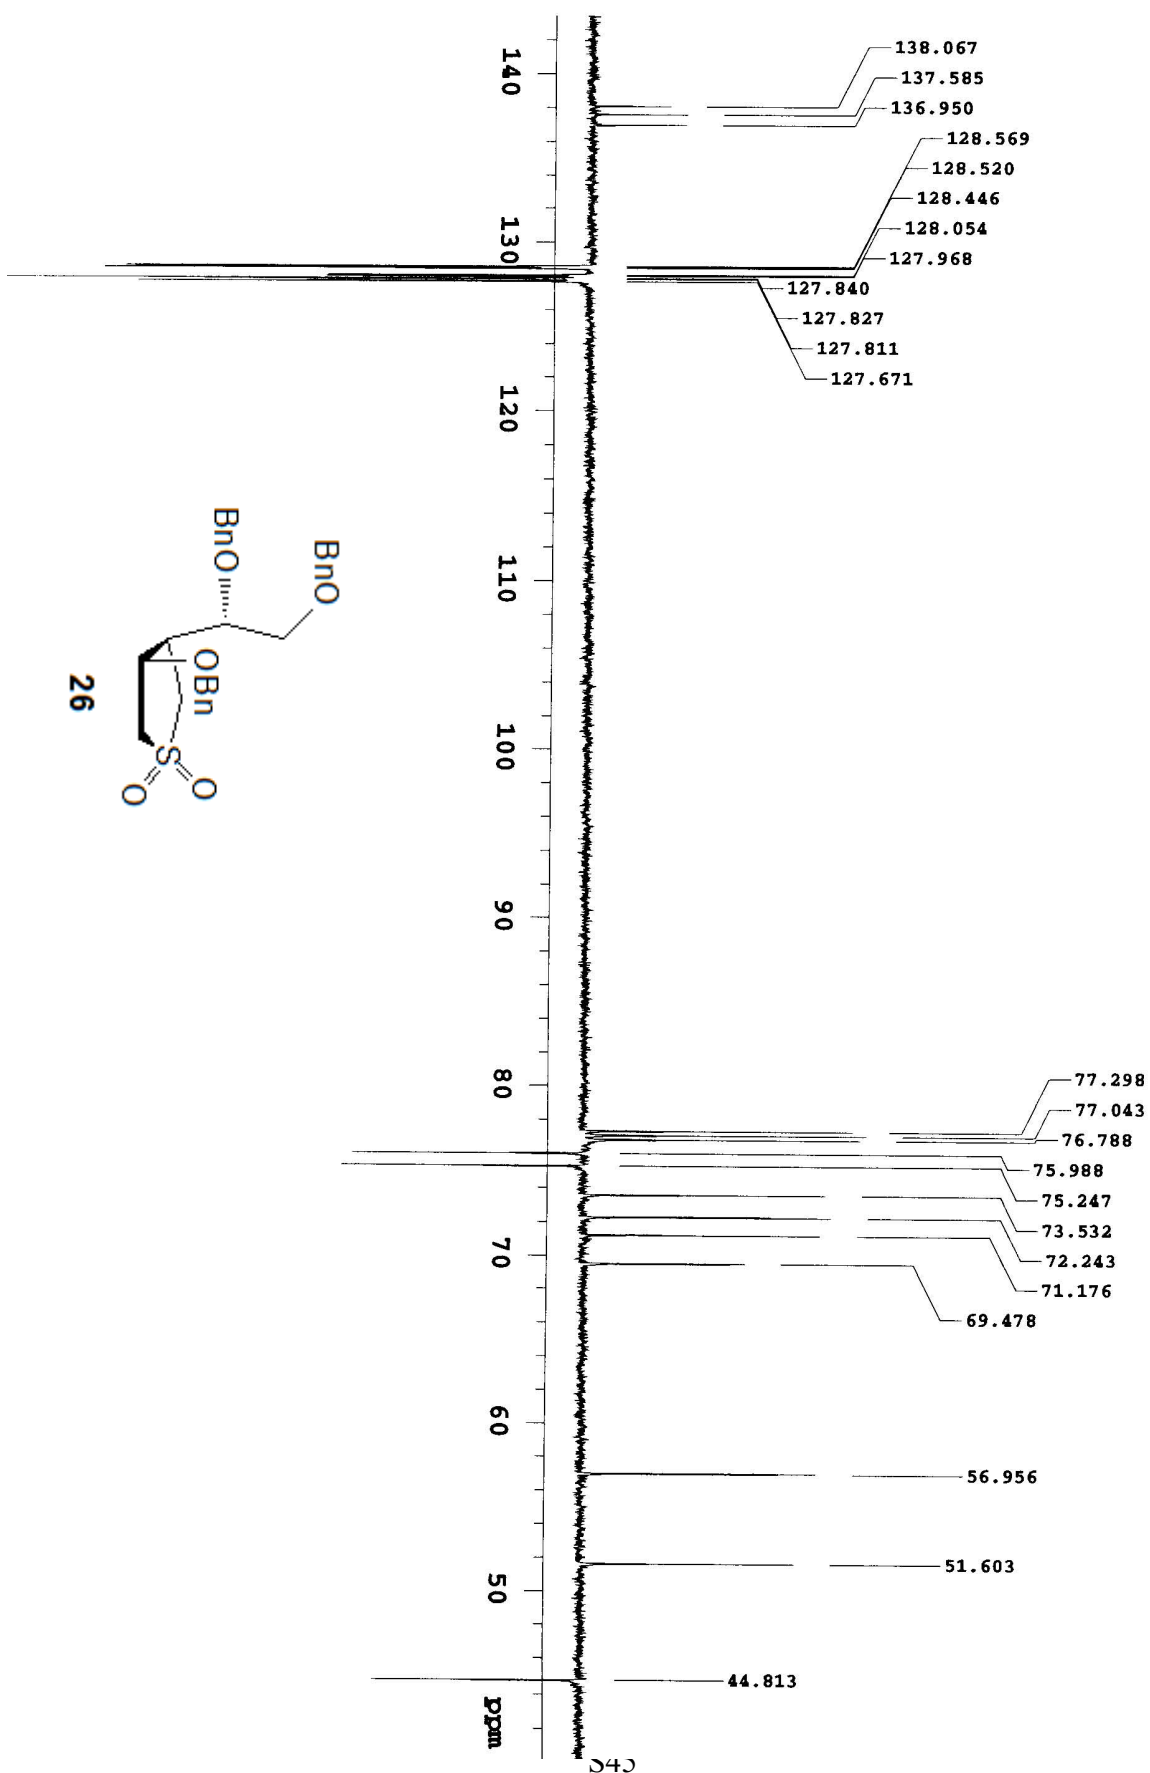

498.124 MHz <sup>1</sup>H 1D in cd3od (ref. to CD3OD @ 3.30 ppm), temp 27.2 C -> actual temp = 27.0 C, sw probe  
Pulse Sequence: s2pul1

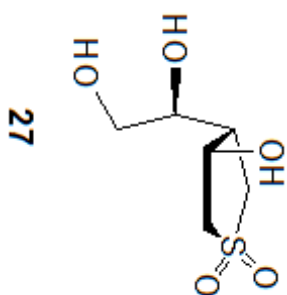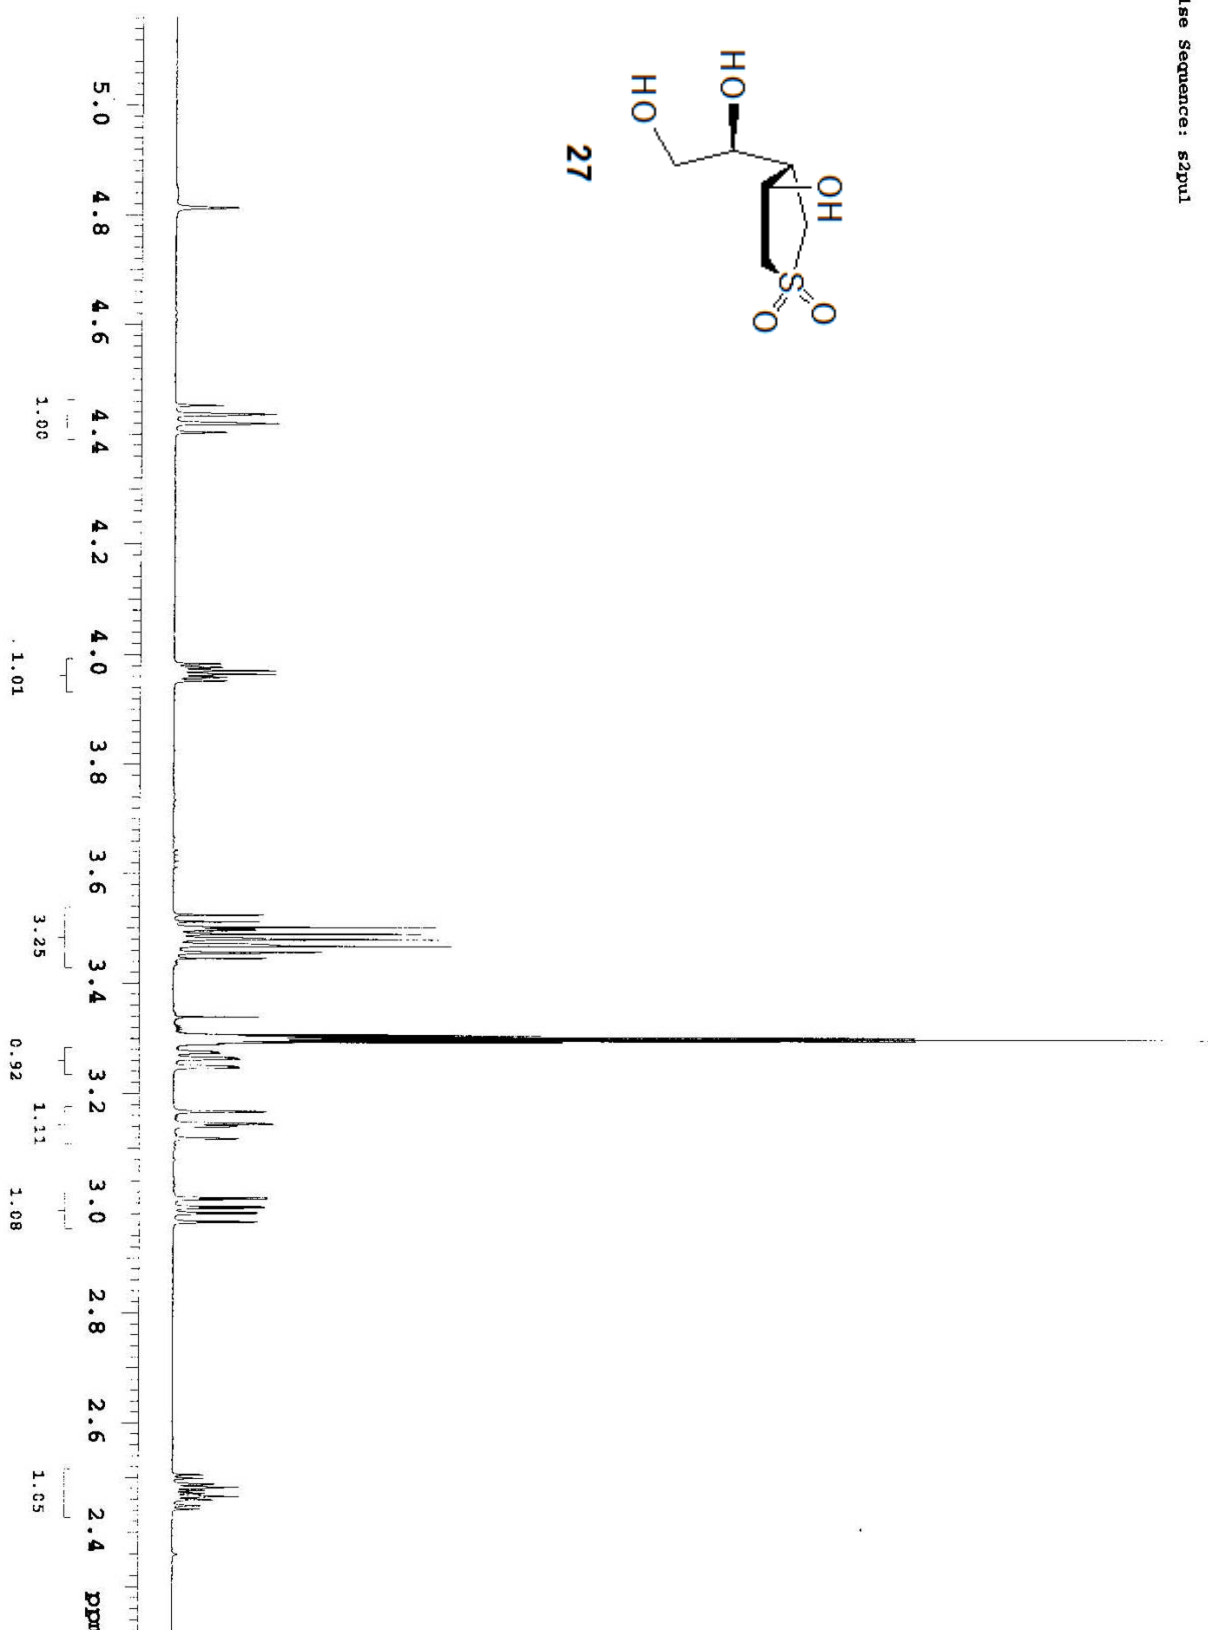

125.694 MHz  $\text{CDCl}_3[\text{H}_1]$  apt in  $\text{cd}3\text{od}$  (ref. to  $\text{CD}_3\text{OD}$  @ 49.0 ppm), temp 26.1 C -> actual temp = 27.0 C, autowdb probe  
C & CH2 same, CH & CH3 opposite side of solvent signal  
Pulse Sequence: apt

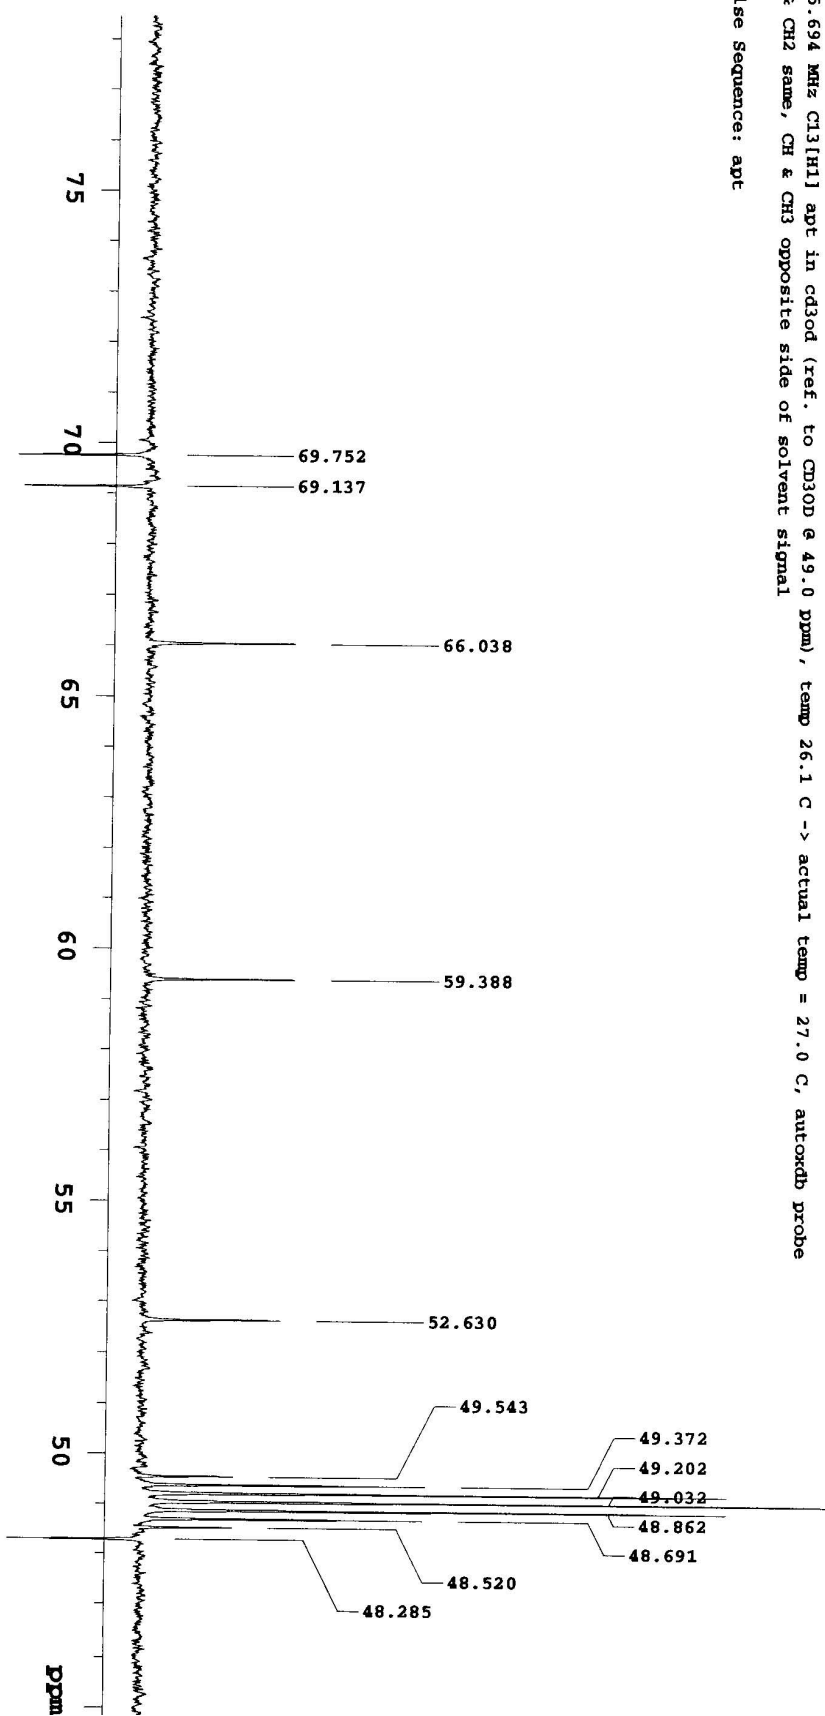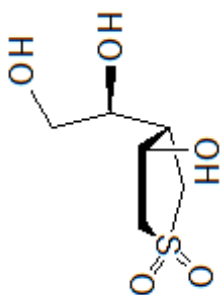

27

500 MHz 1D in CD3OD (ref. to CD3OD @ 3.30 ppm), temp 27.2 C -> actual temp = 27.0 C, sw500 probe  
Pulse Sequence: szpu1

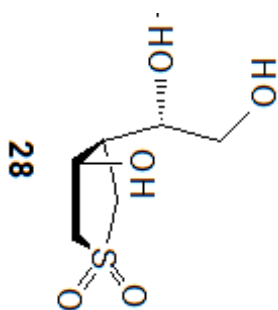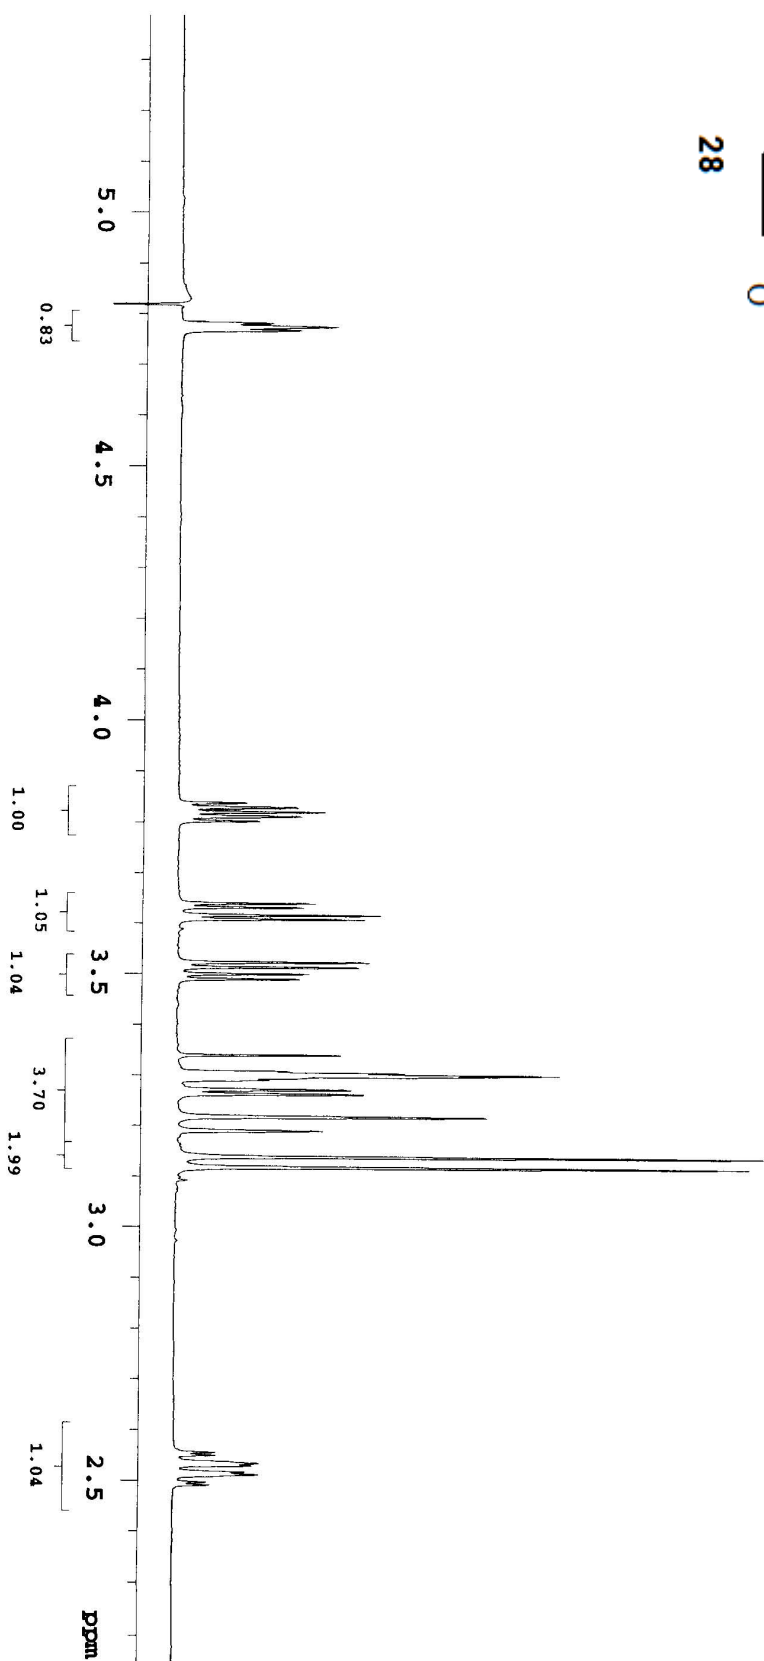

125 MHz APT in CD3OD (ref. to CD3OD @ 49.0 ppm), temp 27.2 C -> actual temp = 27.0 C, sw probe C & CH2 same, CH & CH3 opposite side of solvent signal

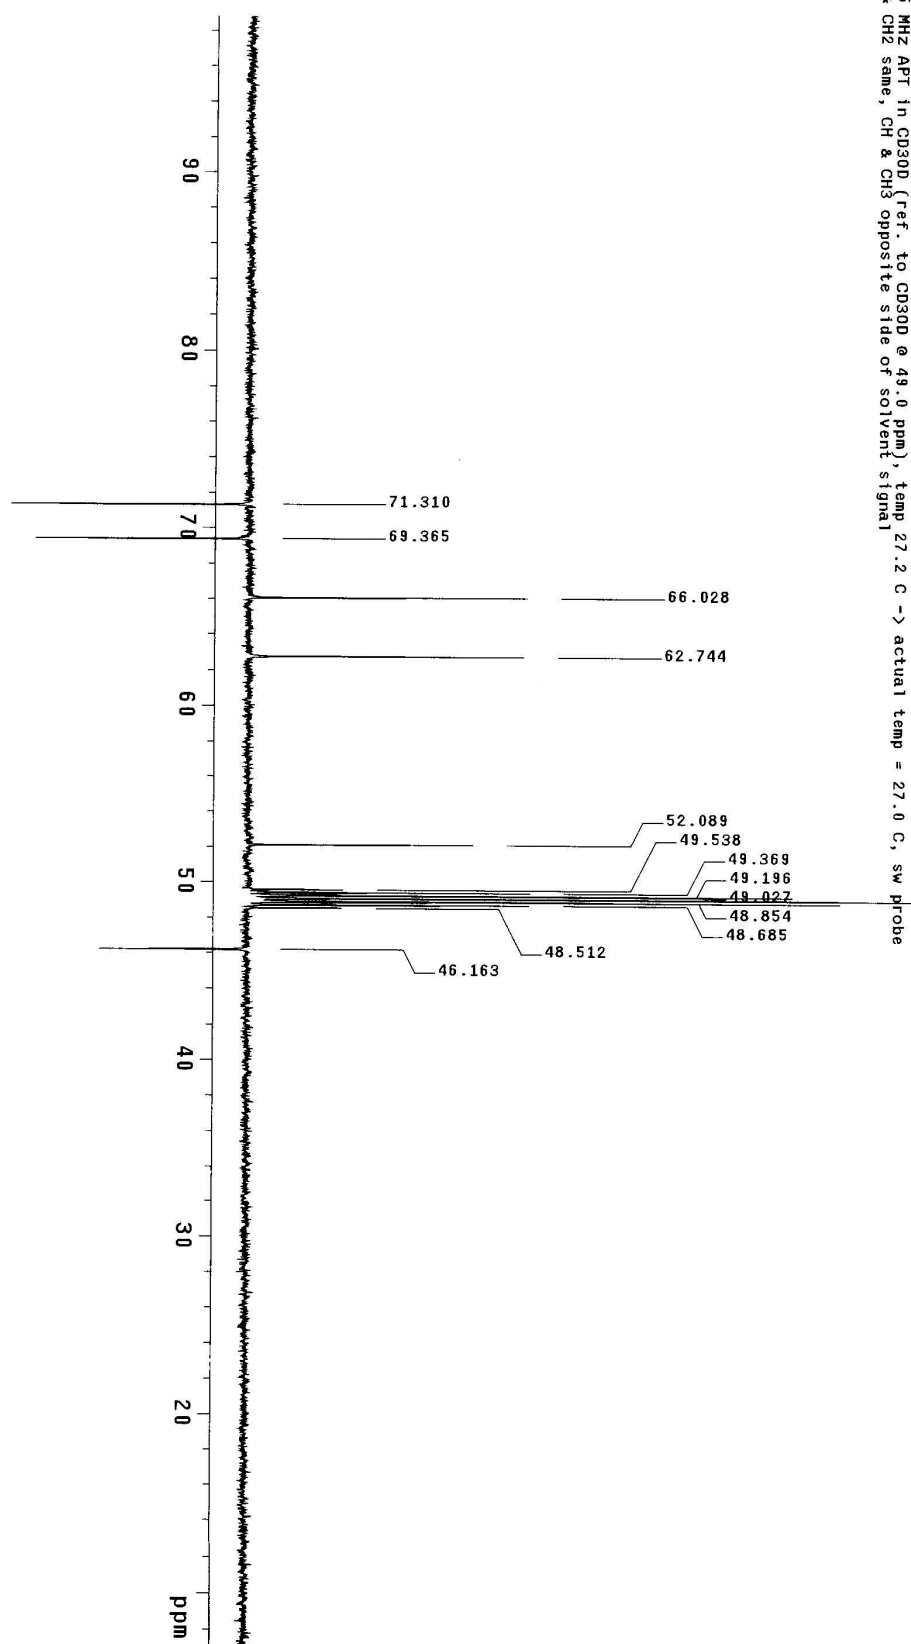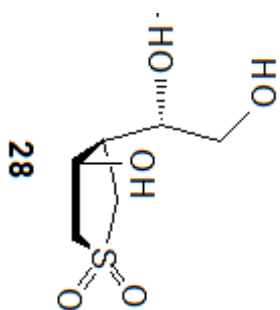

500 MHz 1D in CD3OD (ref. to CD3OD @ 3.30 ppm), temp 26.1 C -> actual temp = 27.0 C, autoxdrb probe  
Pulse Sequence: presat

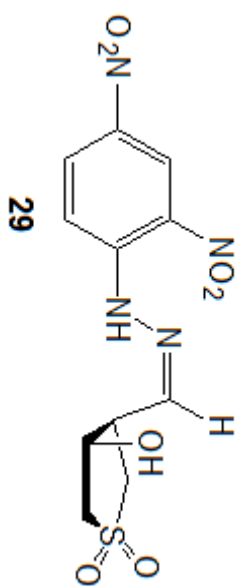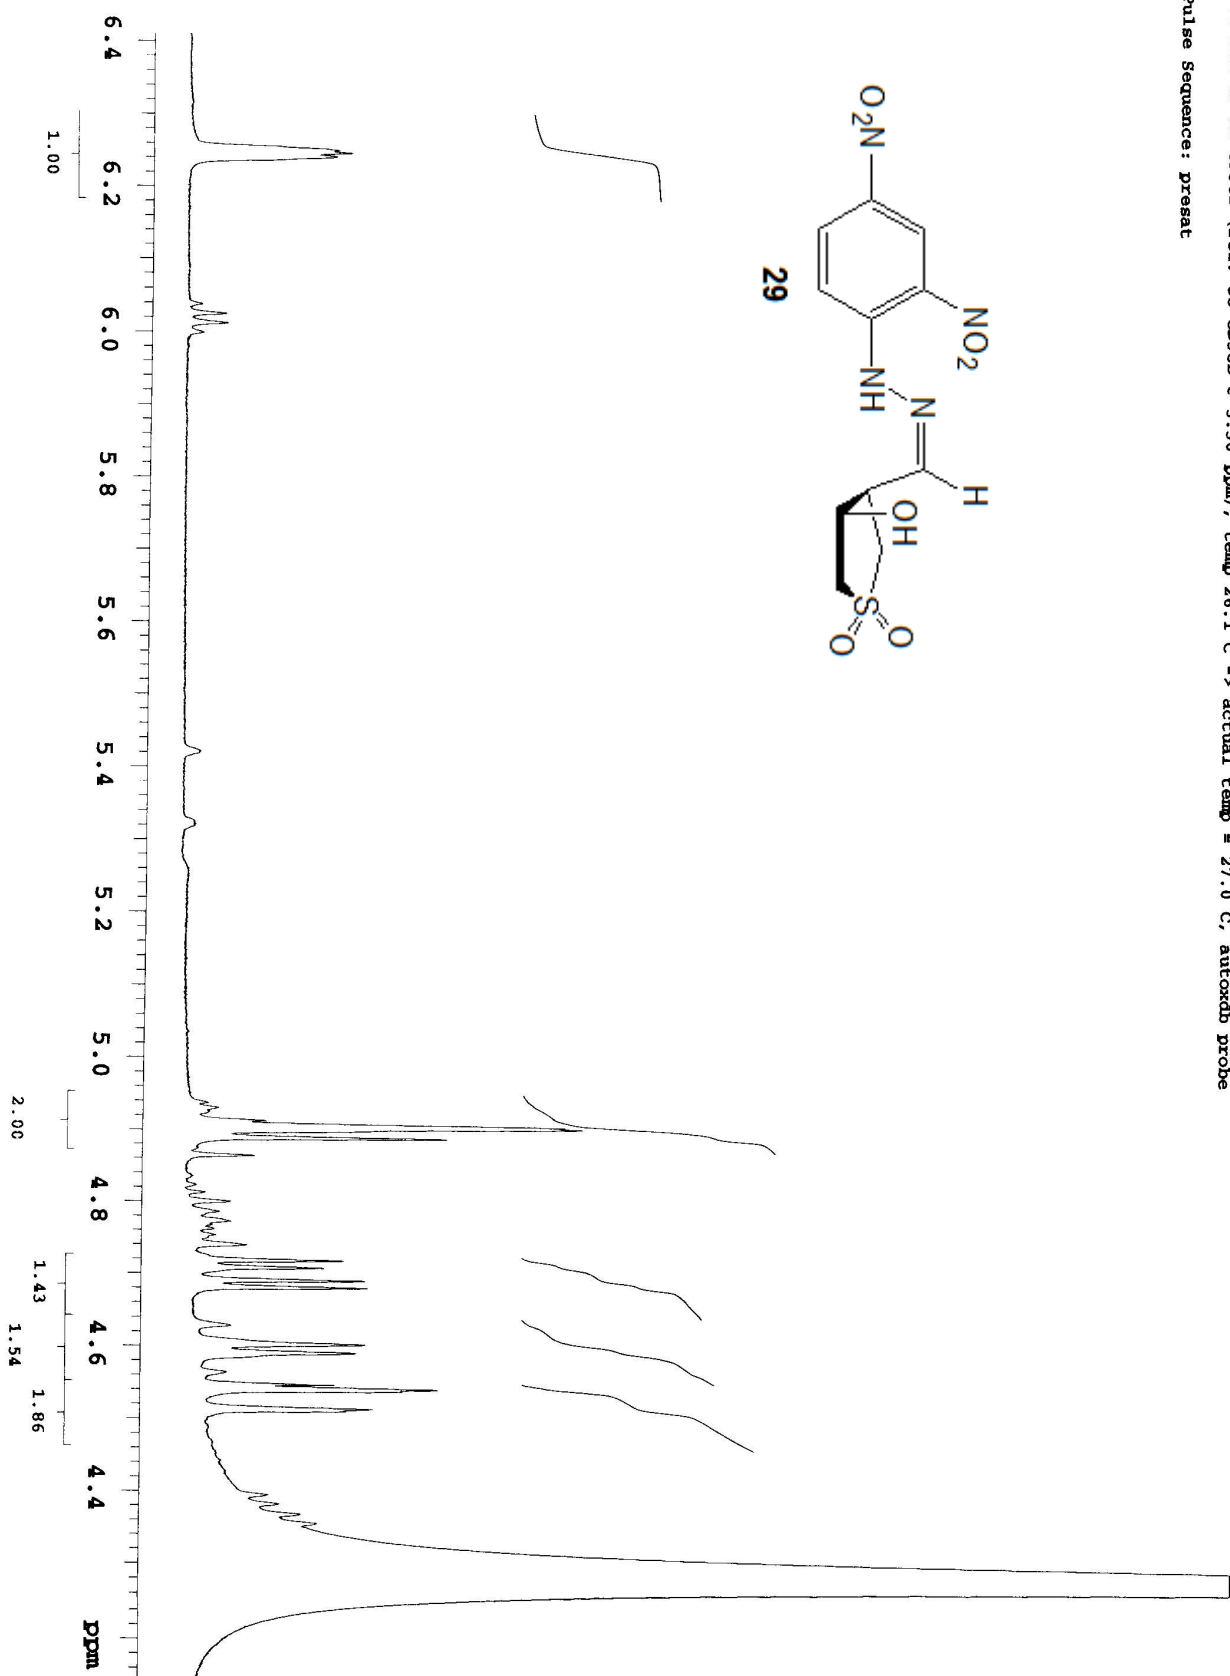

125.267 MHz  $^{13}\text{C}$ [H1] apt in dmsd (ref. to DMSO @ 39.5 ppm), temp 27.2 C -> actual temp = 27.0 C, autokdb probe  
C & CH2 same, CH & CH3 opposite side of solvent signal  
Pulse Sequence: apt

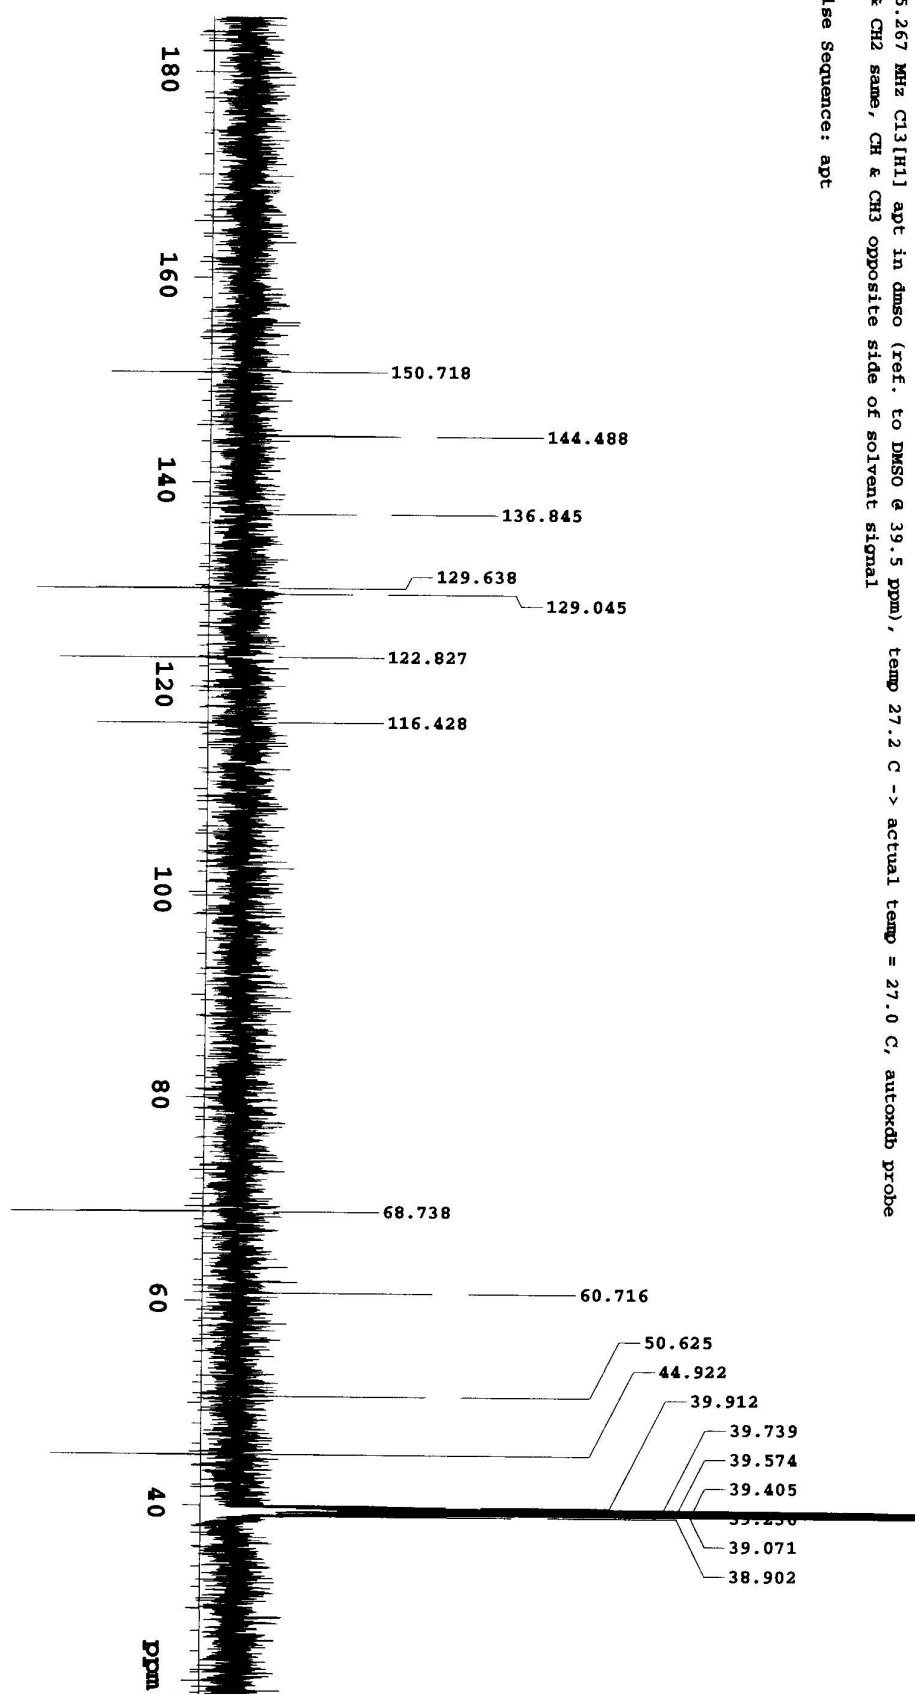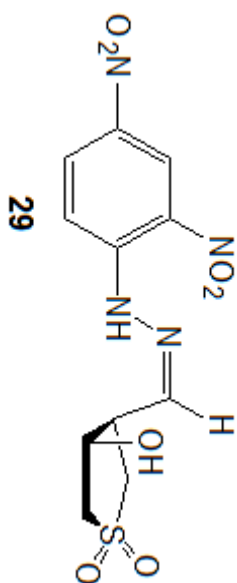

399.794 MHz <sup>1</sup>H 1D in cdcl<sub>3</sub> (ref. to CDCl<sub>3</sub> @ 7.26 ppm), temp 26.5 C -> actual temp = 27.0 C, autoxdr probe  
Pulse Sequence: s2pu1

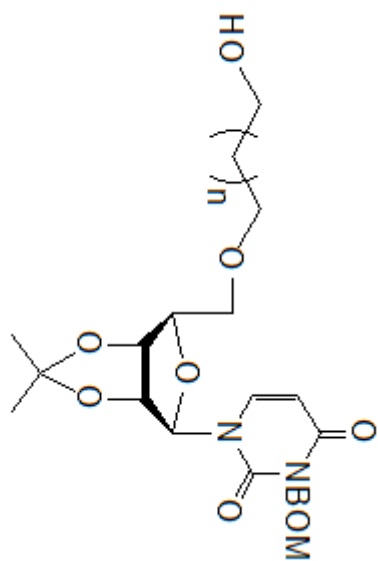

**S6** n = 1

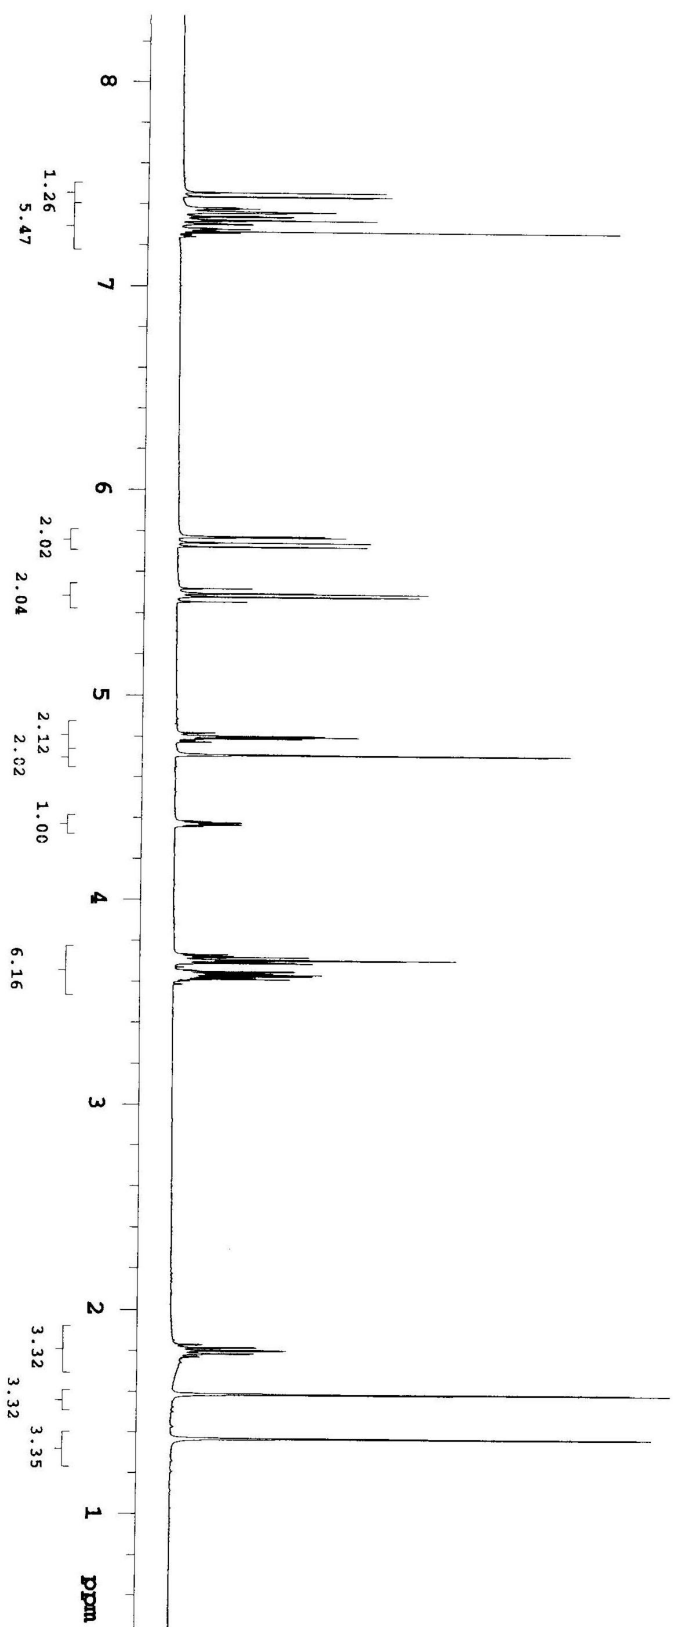



Pulse Sequence: apt

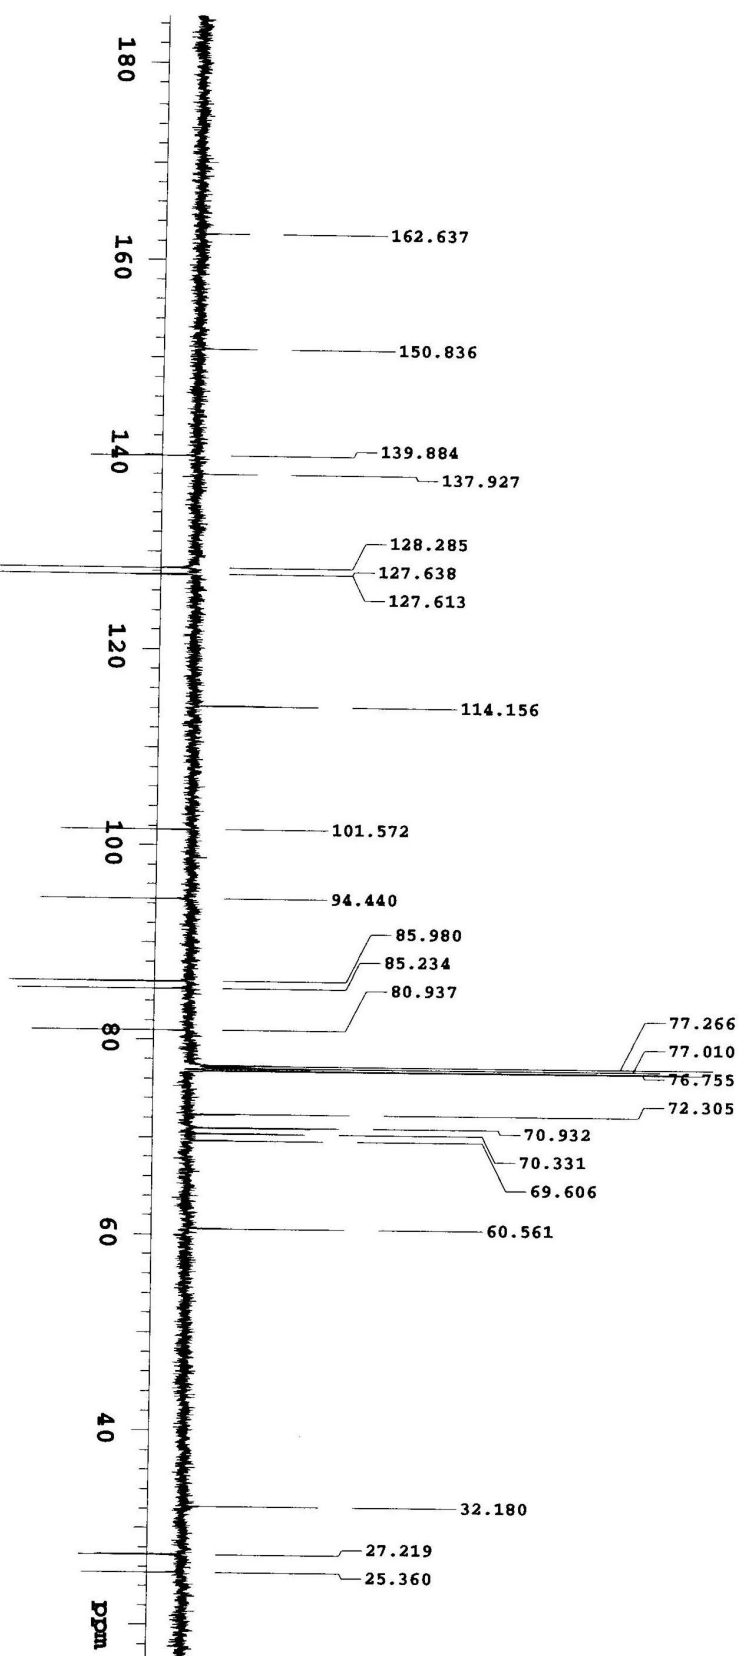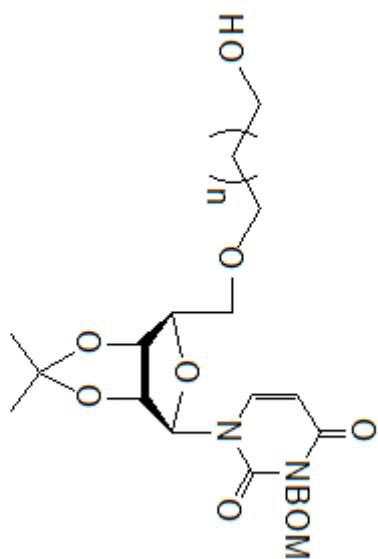

**\$6**     $n = 1$

499.823 MHz 1H in

File: Lij-4-61-hmxc

Pulse Sequence: zgpg30

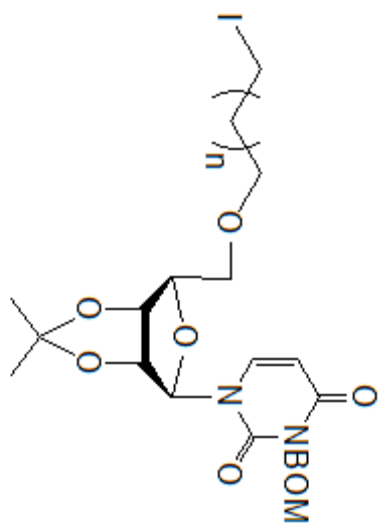

42 n = 1

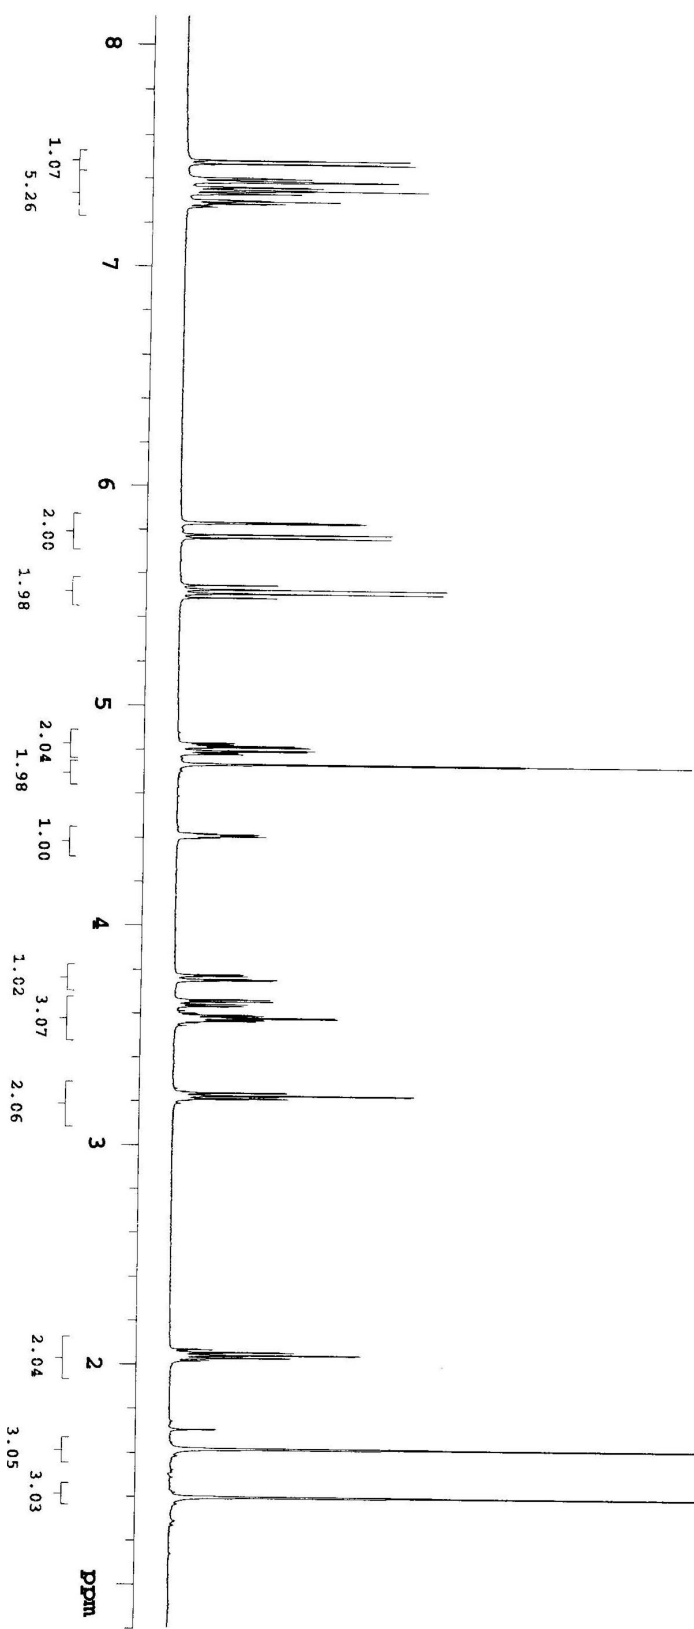

125.633 MHz  $^{13}\text{C}\{^1\text{H}\}$  apt in  $\text{cdcl}_3$  (ref. to  $\text{CDCl}_3$  @ 77.06 ppm), temp 26.1 C -> actual temp = 27.0 C, autowdb probe  
 C & CH2 same, CH & CH3 opposite side of solvent signal  
 Pulse Sequence: apt

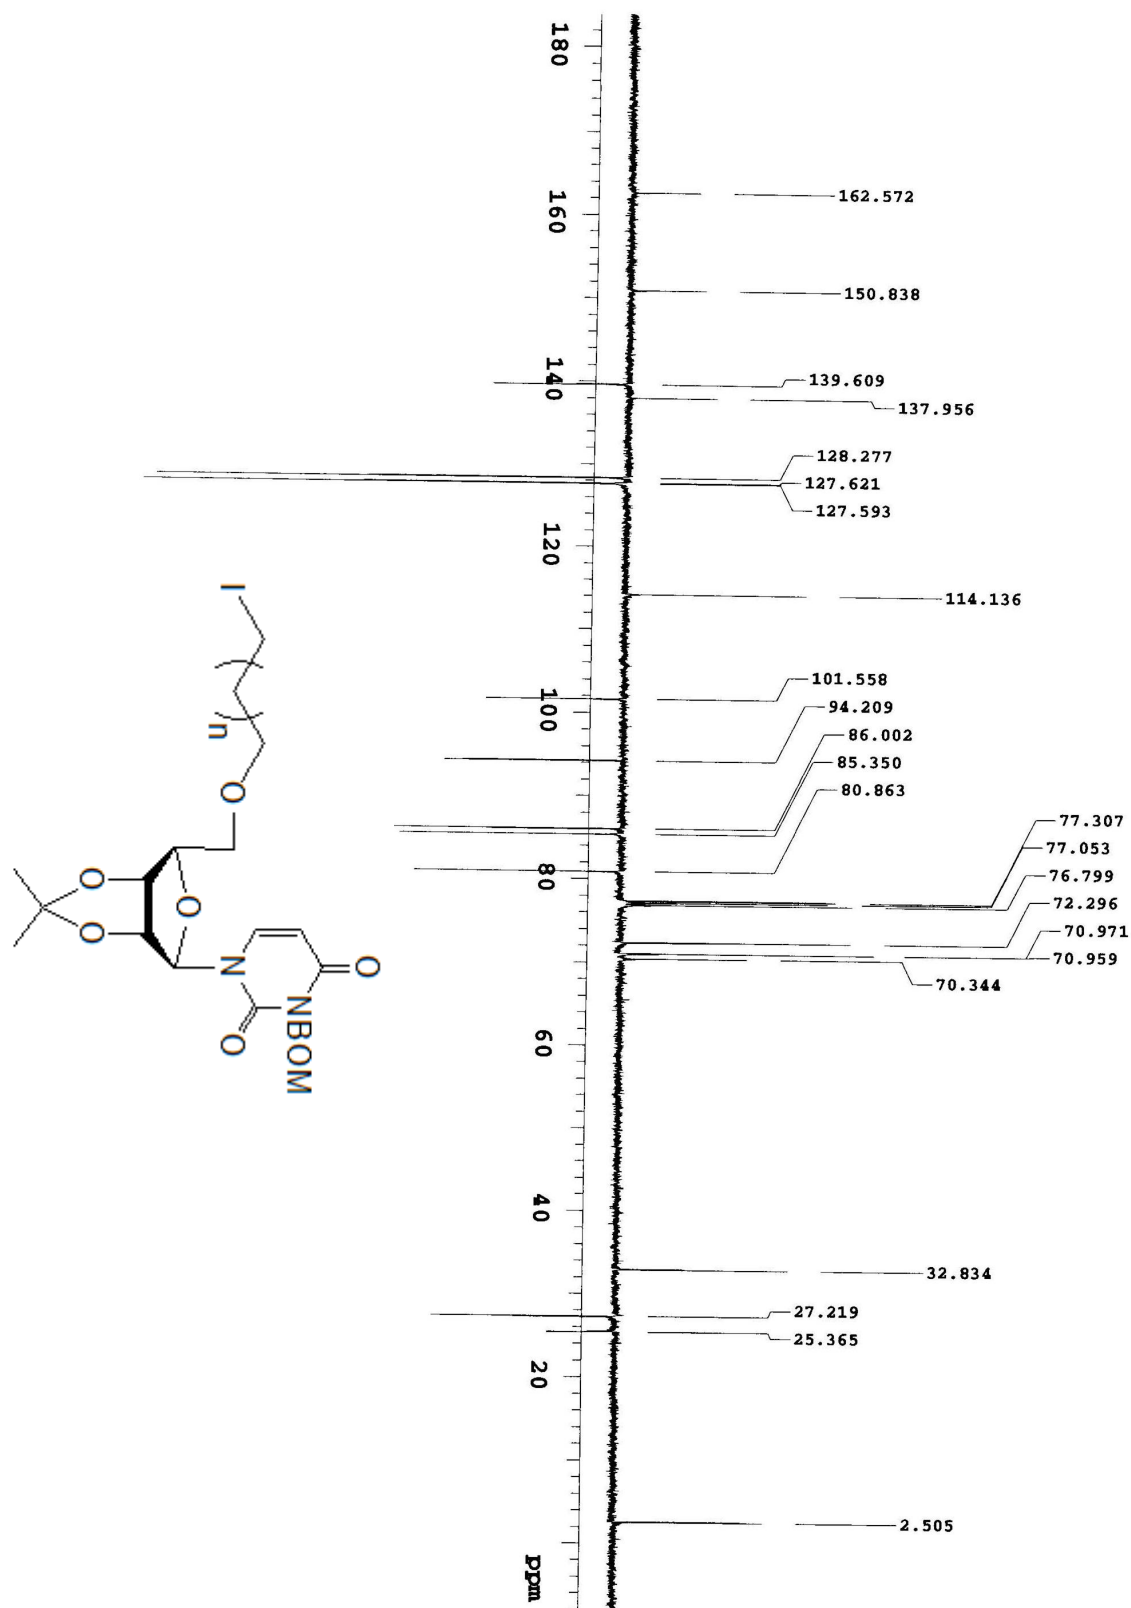

42 n = 1

399.794 MHz <sup>1</sup>H 1D in cdcl<sub>3</sub> (ref. to CDCl<sub>3</sub> @ 7.26 ppm) , temp 26.5 C -> actual temp = 27.0 C, autotxdr probe  
Pulse Sequence: s2pu1

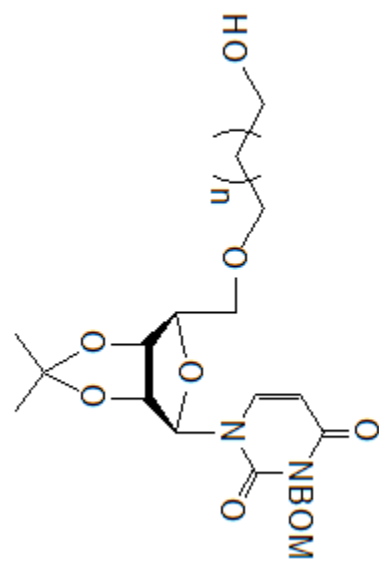

**S7**  $n = 2$

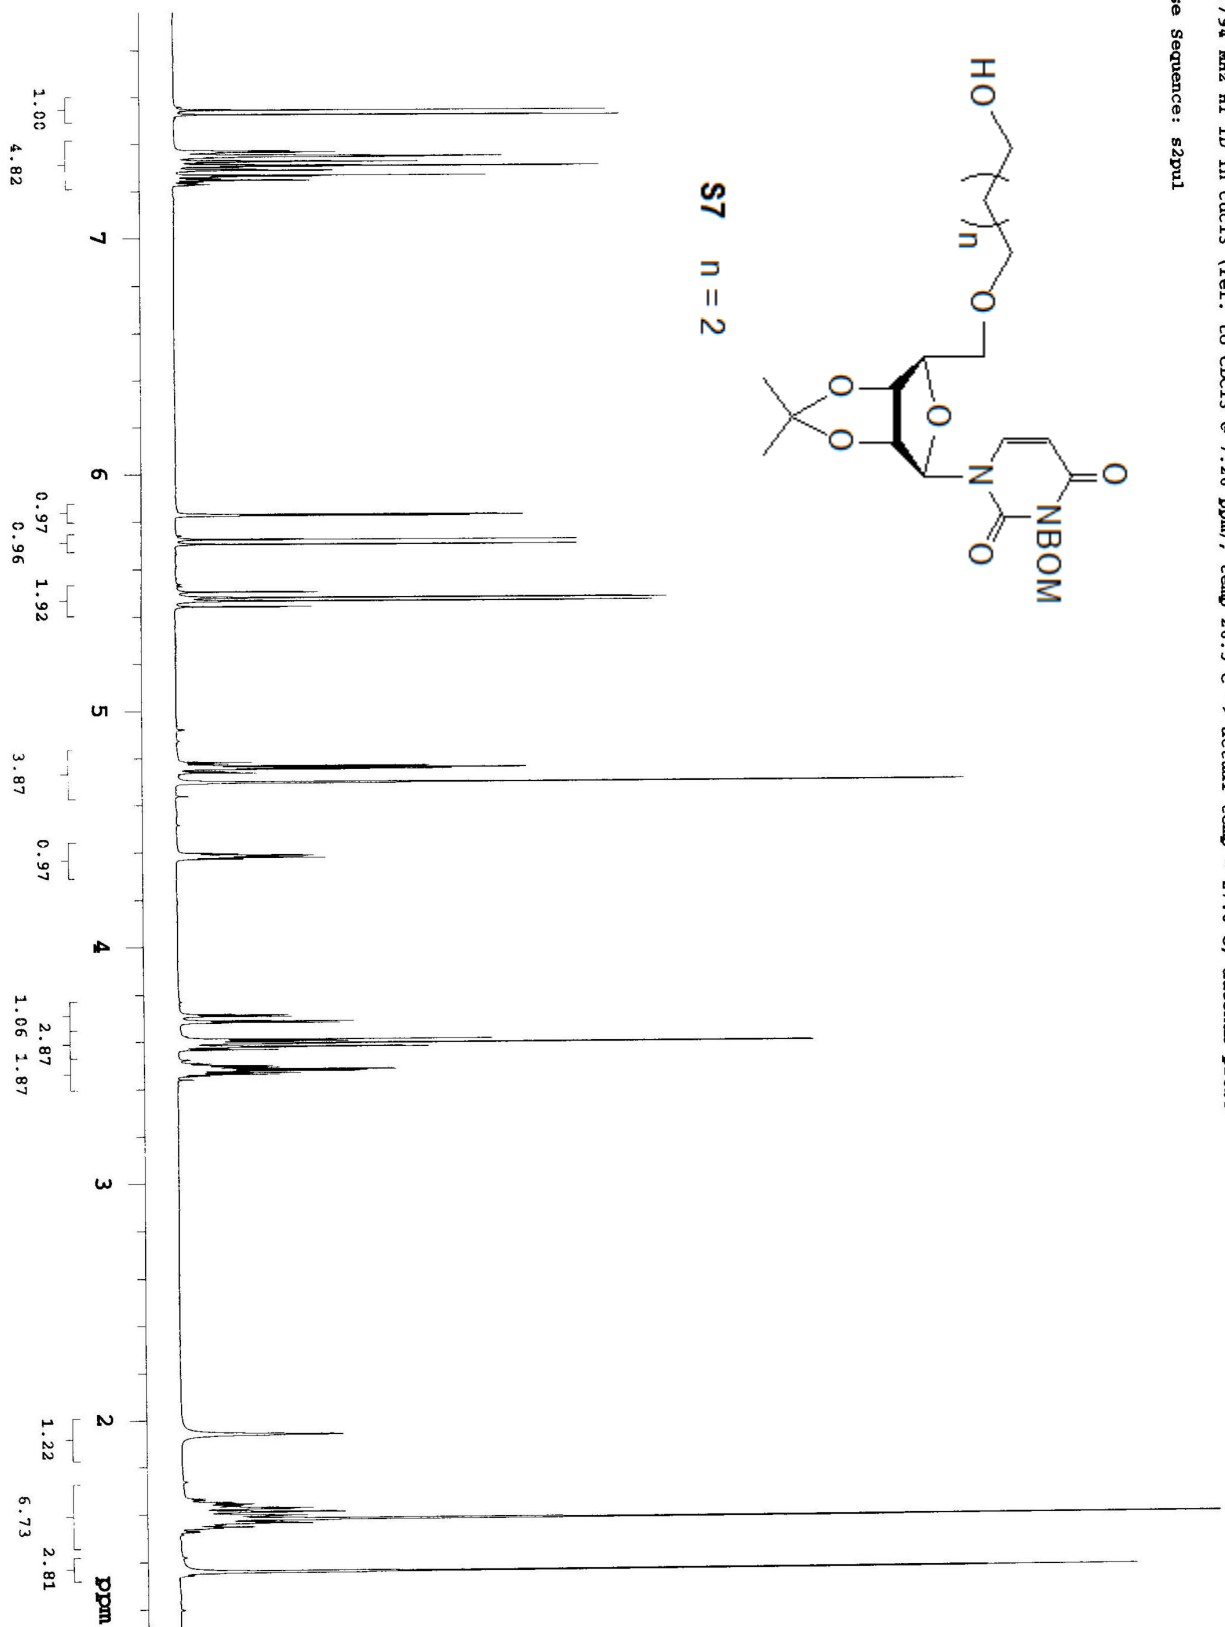

125.266 MHz  $^{13}\text{C}\{^1\text{H}\}$  apt in  $\text{cdcl}_3$  (ref. to  $\text{CDCl}_3$  @ 77.06 ppm), temp 27.2 C -> actual temp = 27.0 C, autotxdr probe  
 C & CH2 same, CH & CH3 opposite side of solvent signal  
 Pulse Sequence: apt

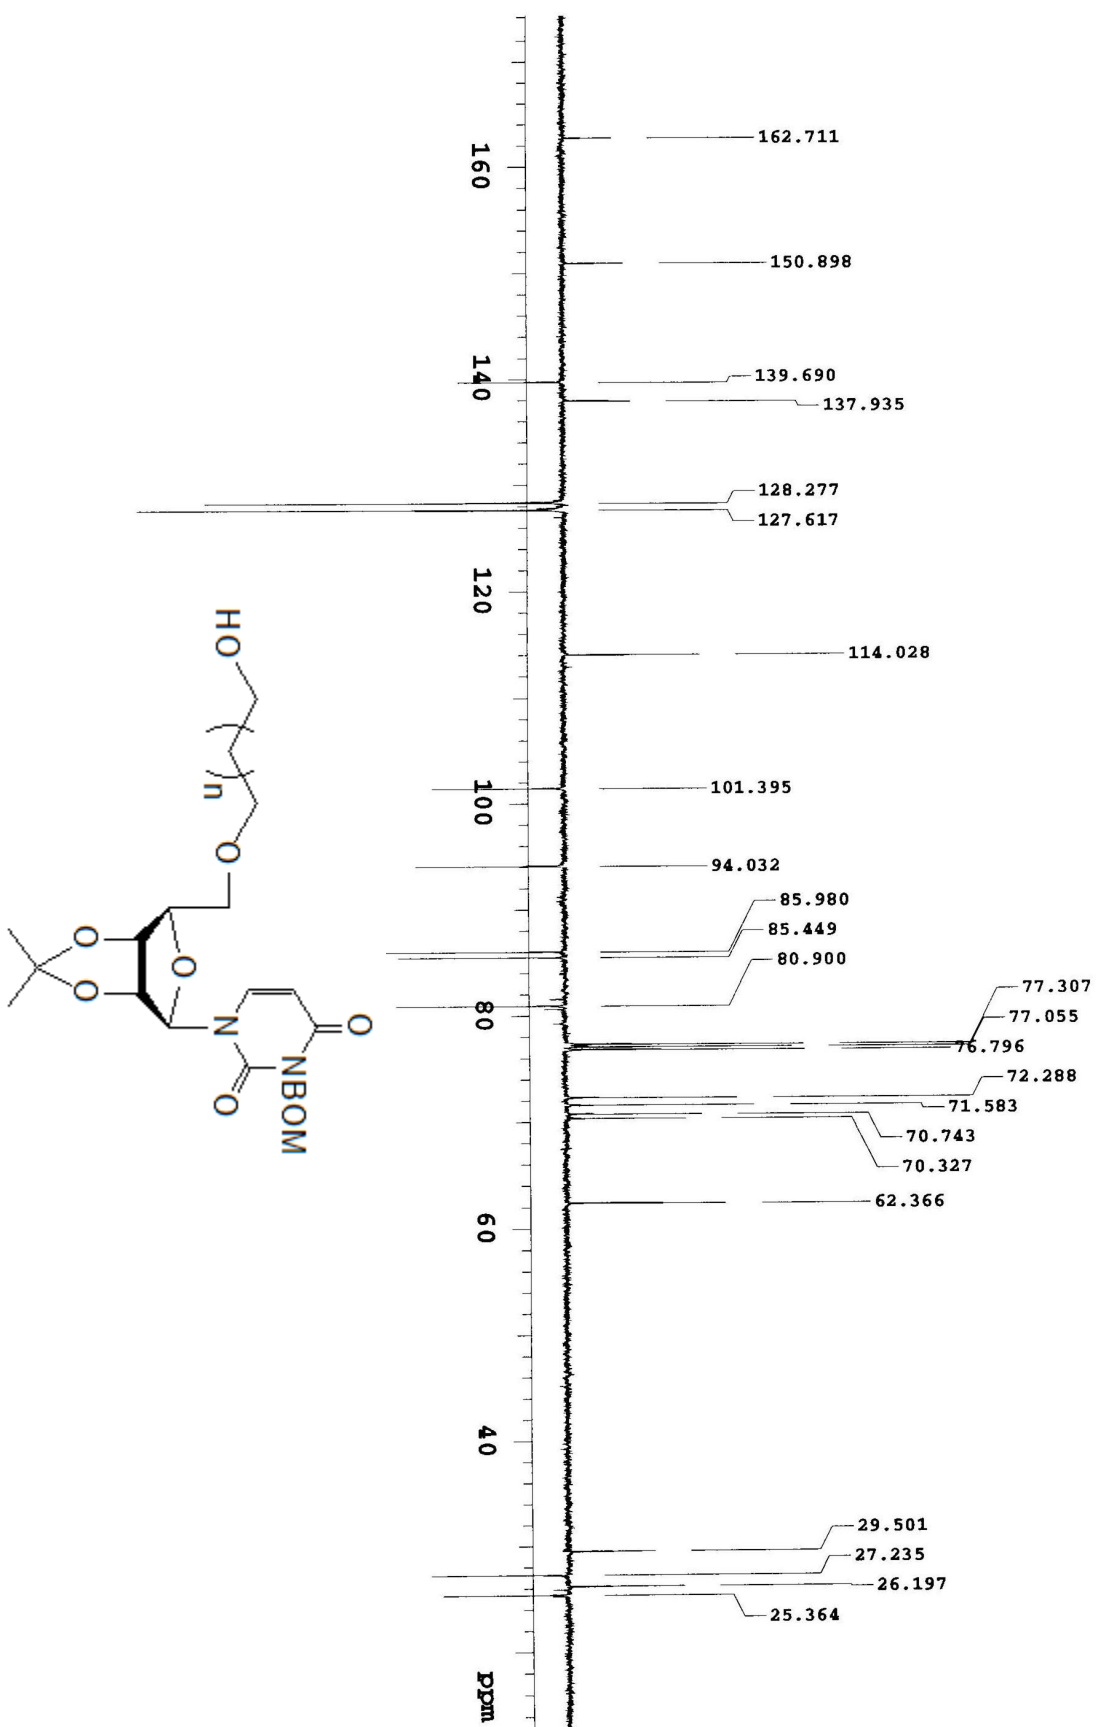

S7 n = 2

498.122 MHz <sup>1</sup>H 1D in cdcl<sub>3</sub> (ref. to CHCl<sub>3</sub> @ 7.26 ppm), temp 27.2 C -> actual temp = 27.0 C, autokxh probe  
Pulse Sequence: s2pul

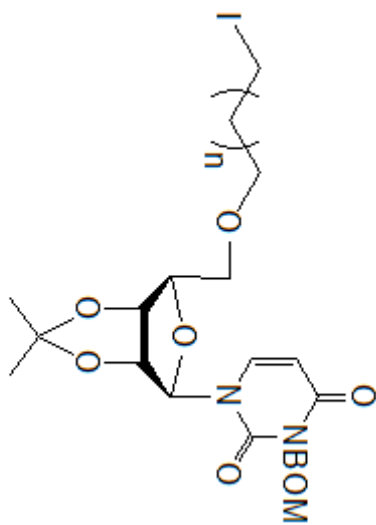

**43** n = 2

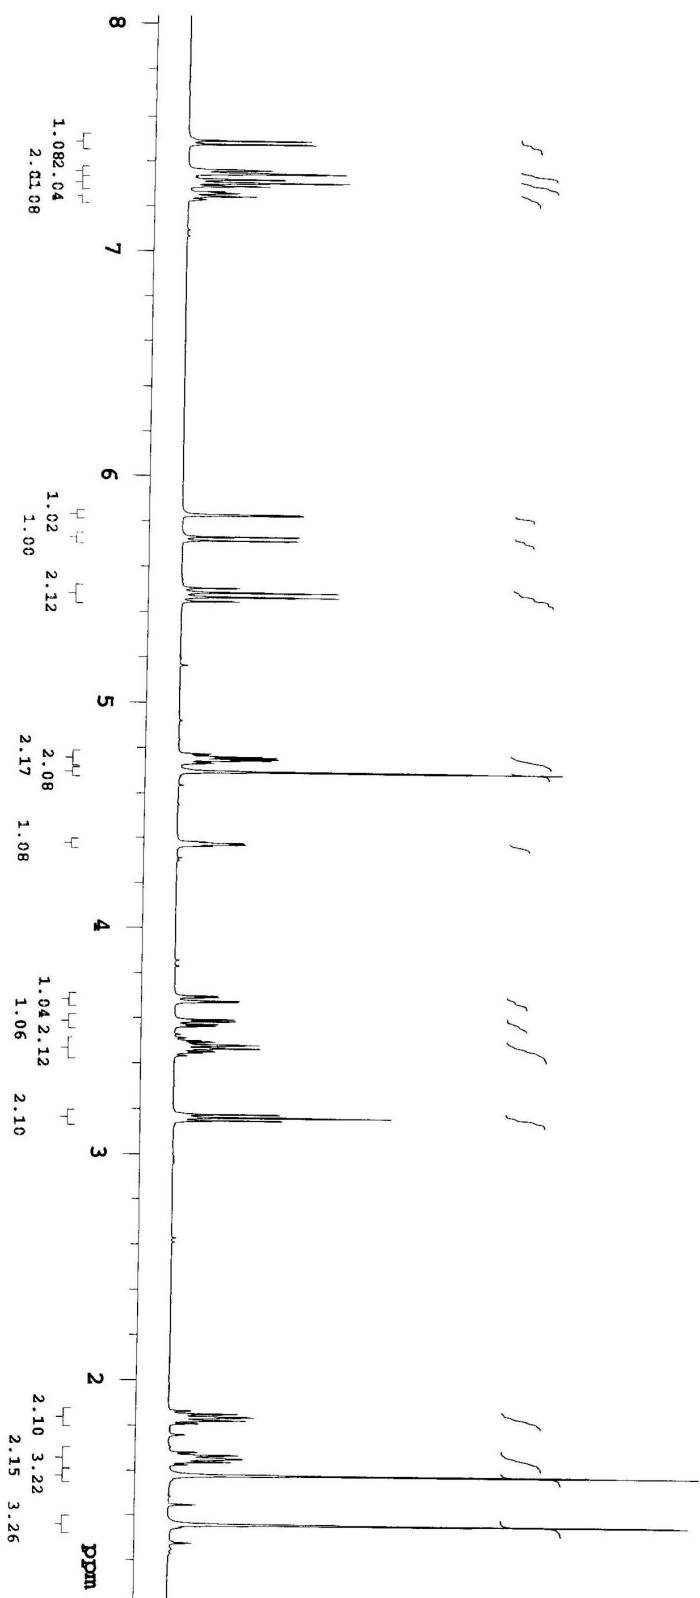

125.266 MHz  $^{13}\text{C}\{^1\text{H}\}$  apt in  $\text{cdCl}_3$  (ref. to  $\text{CDCl}_3$  @ 77.06 ppm), temp 27.2 C -> actual temp = 27.0 C, autoxdb probe  
 C & CH2 same, CH & CH3 opposite side of solvent signal  
 Pulse Sequence: apt

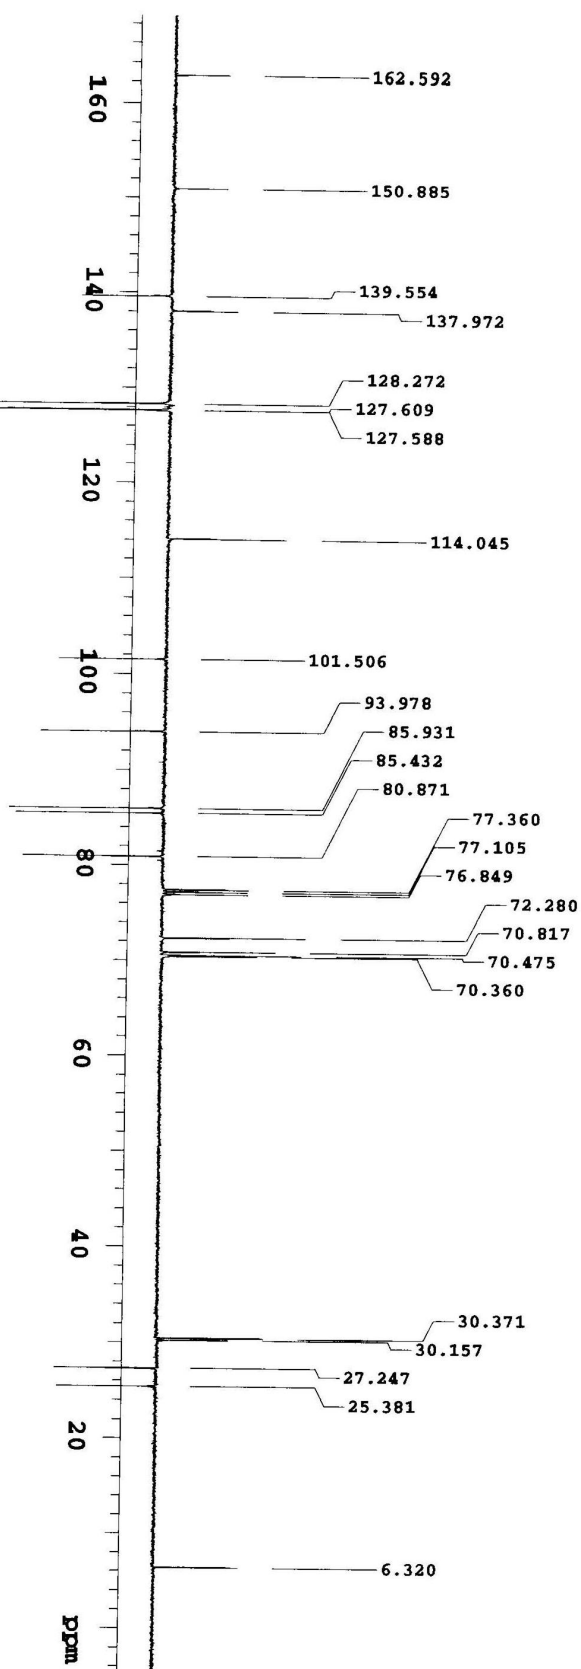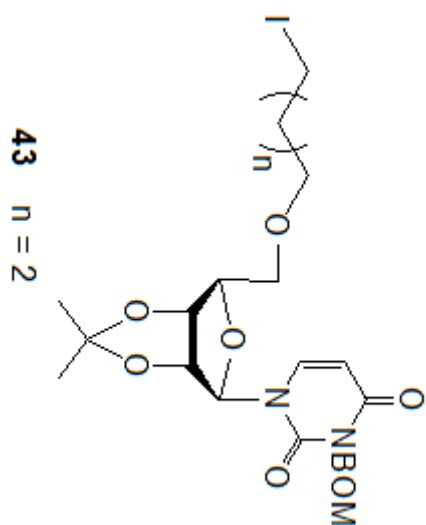

43  $n = 2$

498.122 MHz <sup>1</sup>H 1D in cdcl<sub>3</sub> (ref. to CDCl<sub>3</sub> @ 7.26 ppm), temp 27.2 C -> actual temp = 27.0 C, sw probe  
Pulse Sequence: szpul

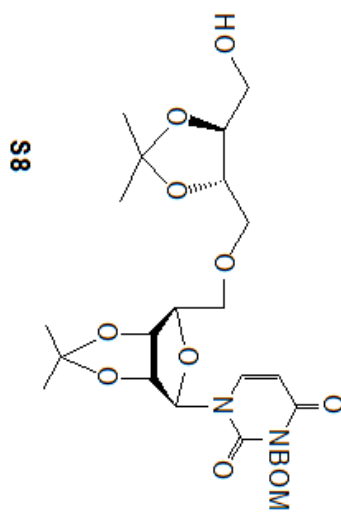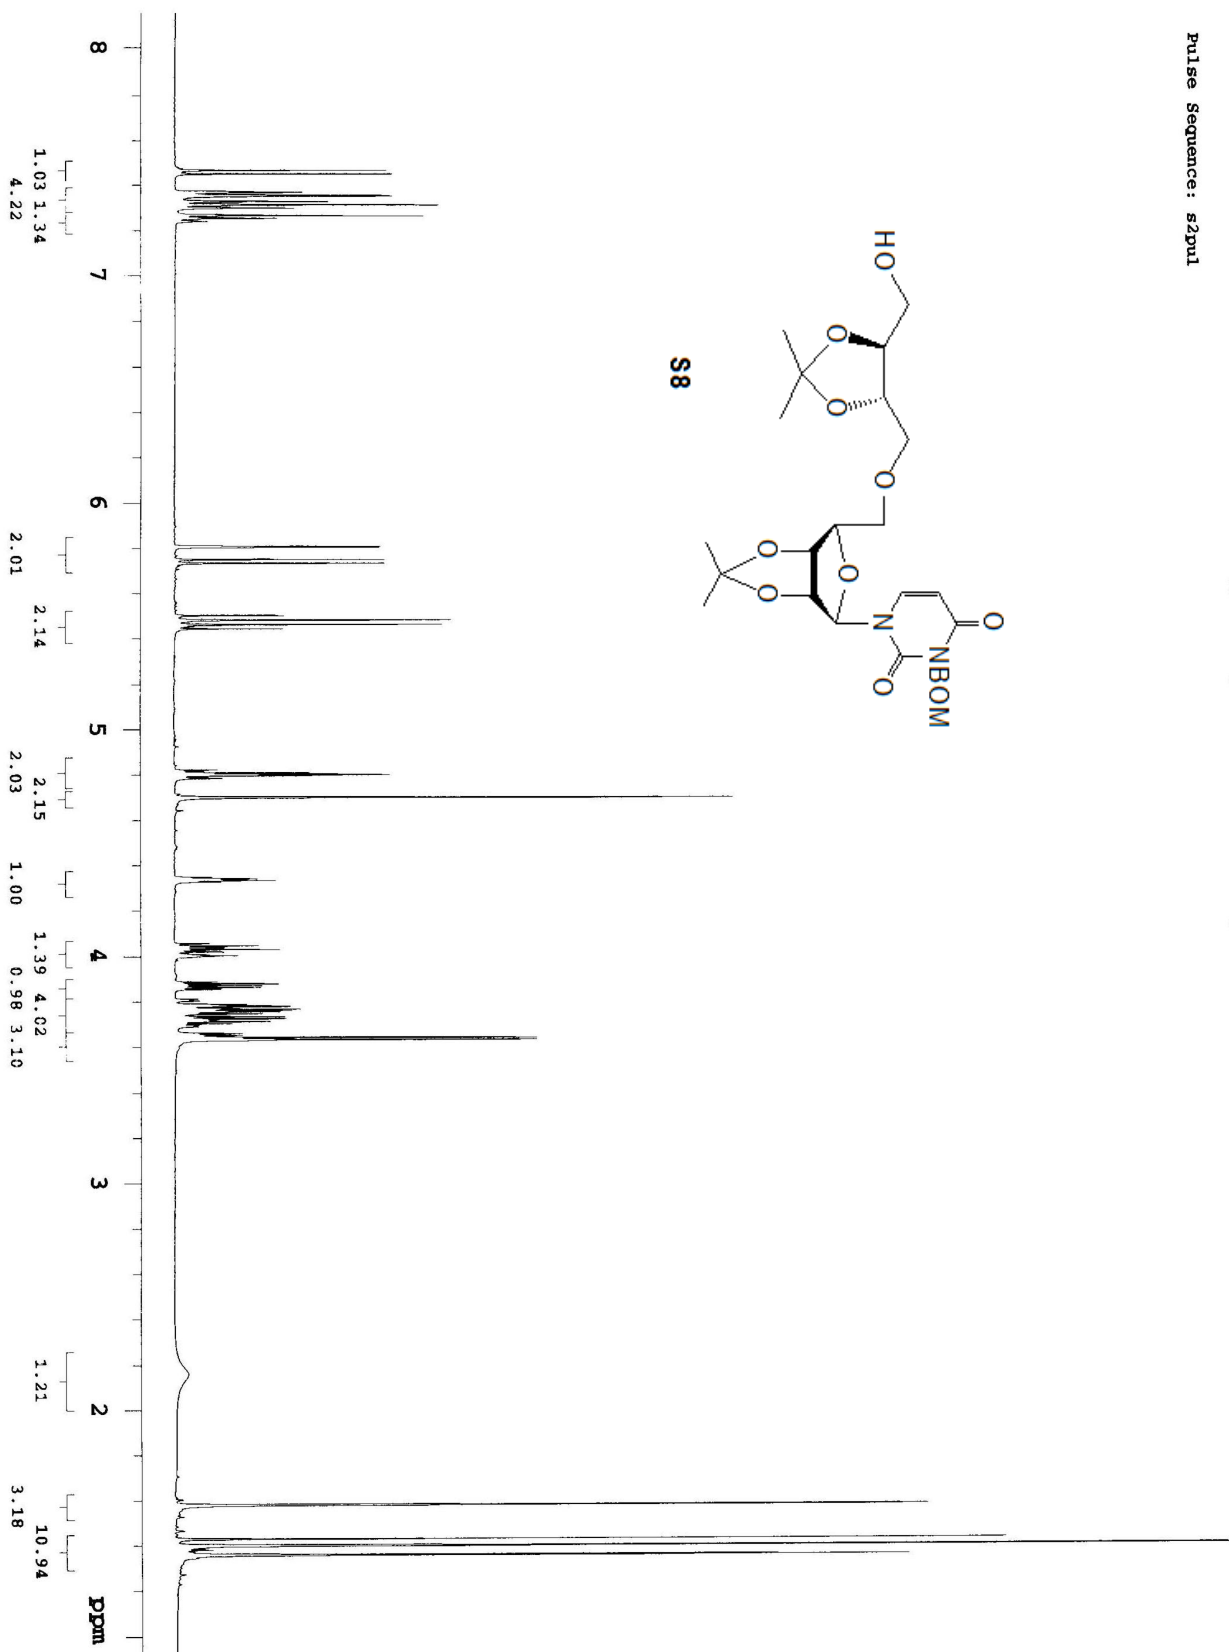



125.266 MHz  $^{13}\text{C}$  NMR] apt in  $\text{cdCl}_3$  (ref. to  $\text{CDCl}_3$  @ 77.06 ppm), temp 27.2 C -> actual temp = 27.0 C, autotxdr probe  
 C & CH2 same, CH & CH3 opposite side of solvent signal  
 Pulse Sequence: apt

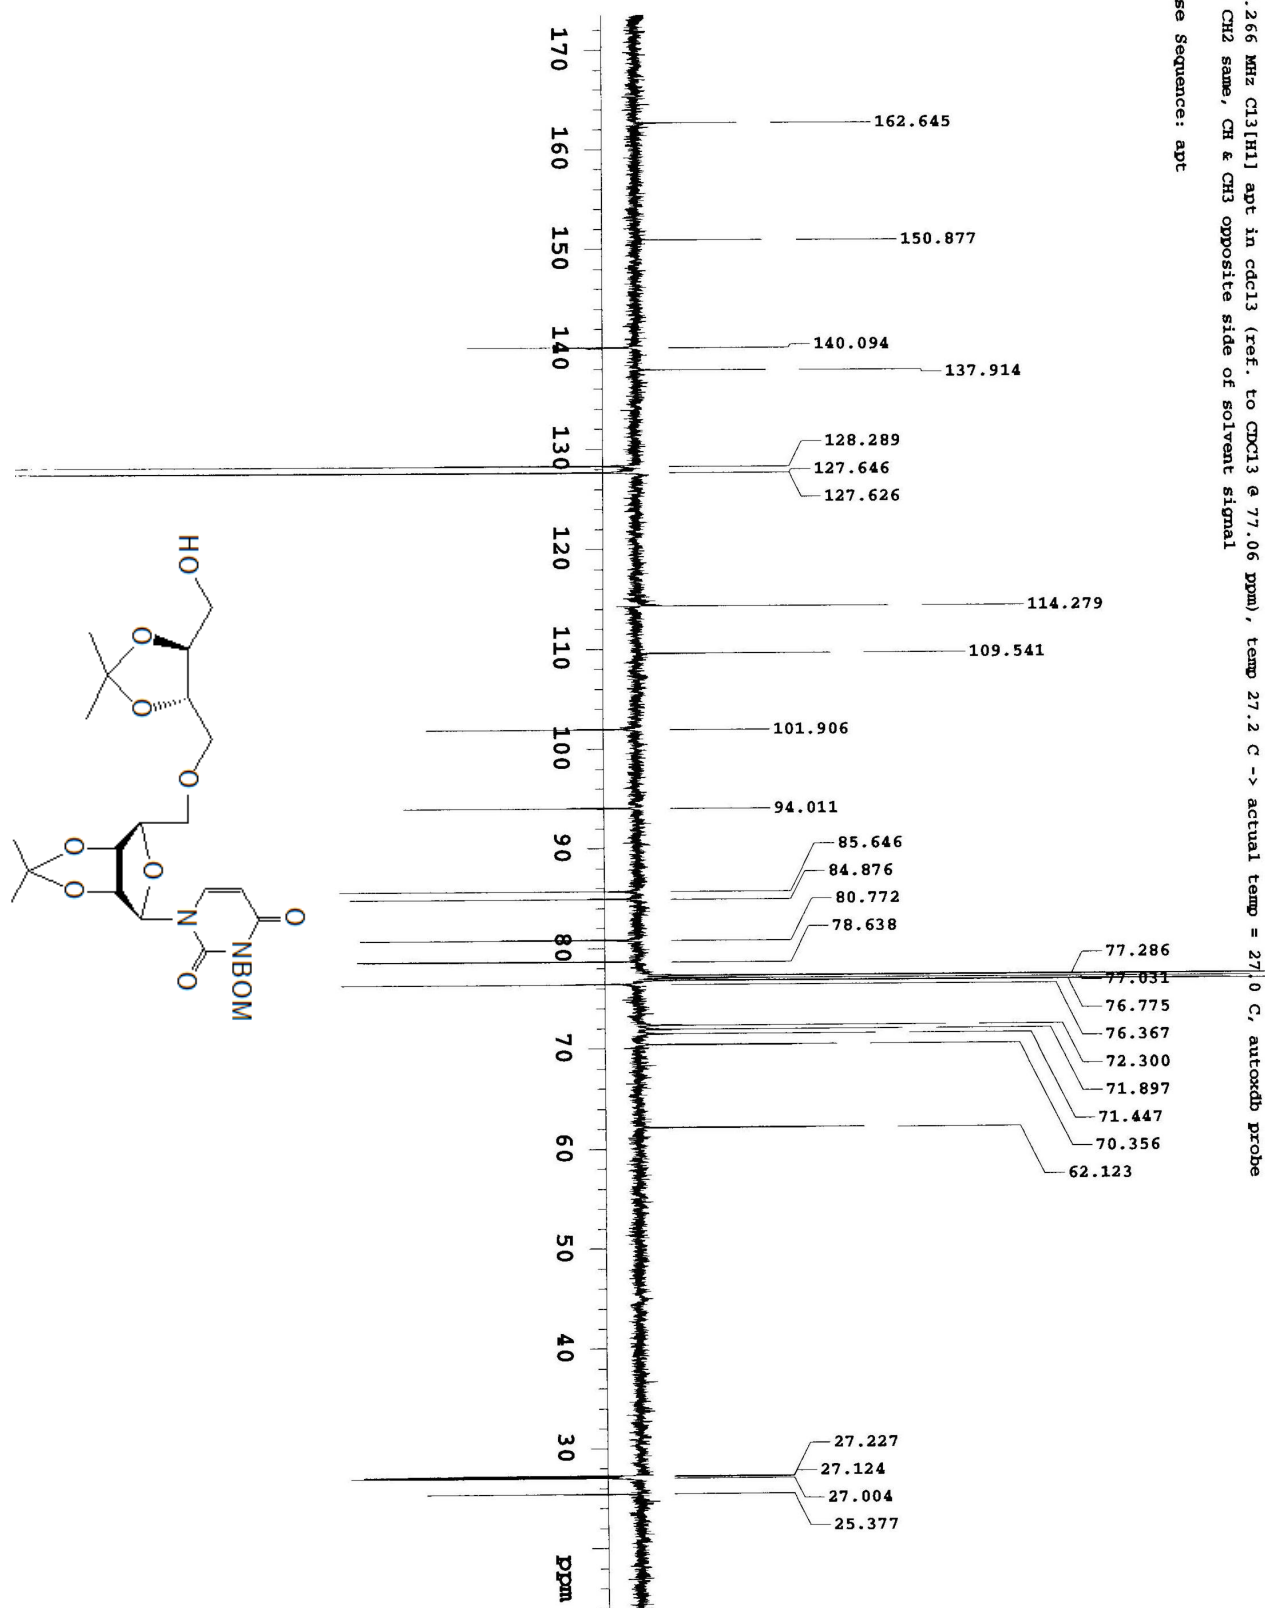

499.821 MHz H1 1D in cdc13 (ref. to CDCl3 @ 7.26 ppm), temp 26.1 C -> actual temp = 27.0 C, autotxdr probe  
Pulse Sequence: s2pul1

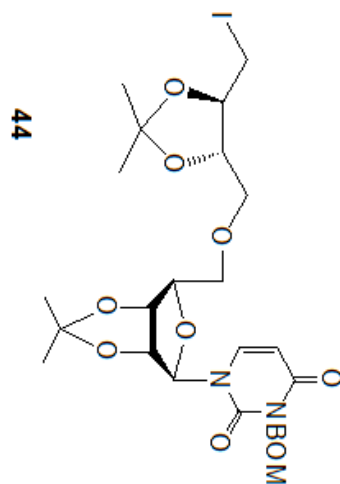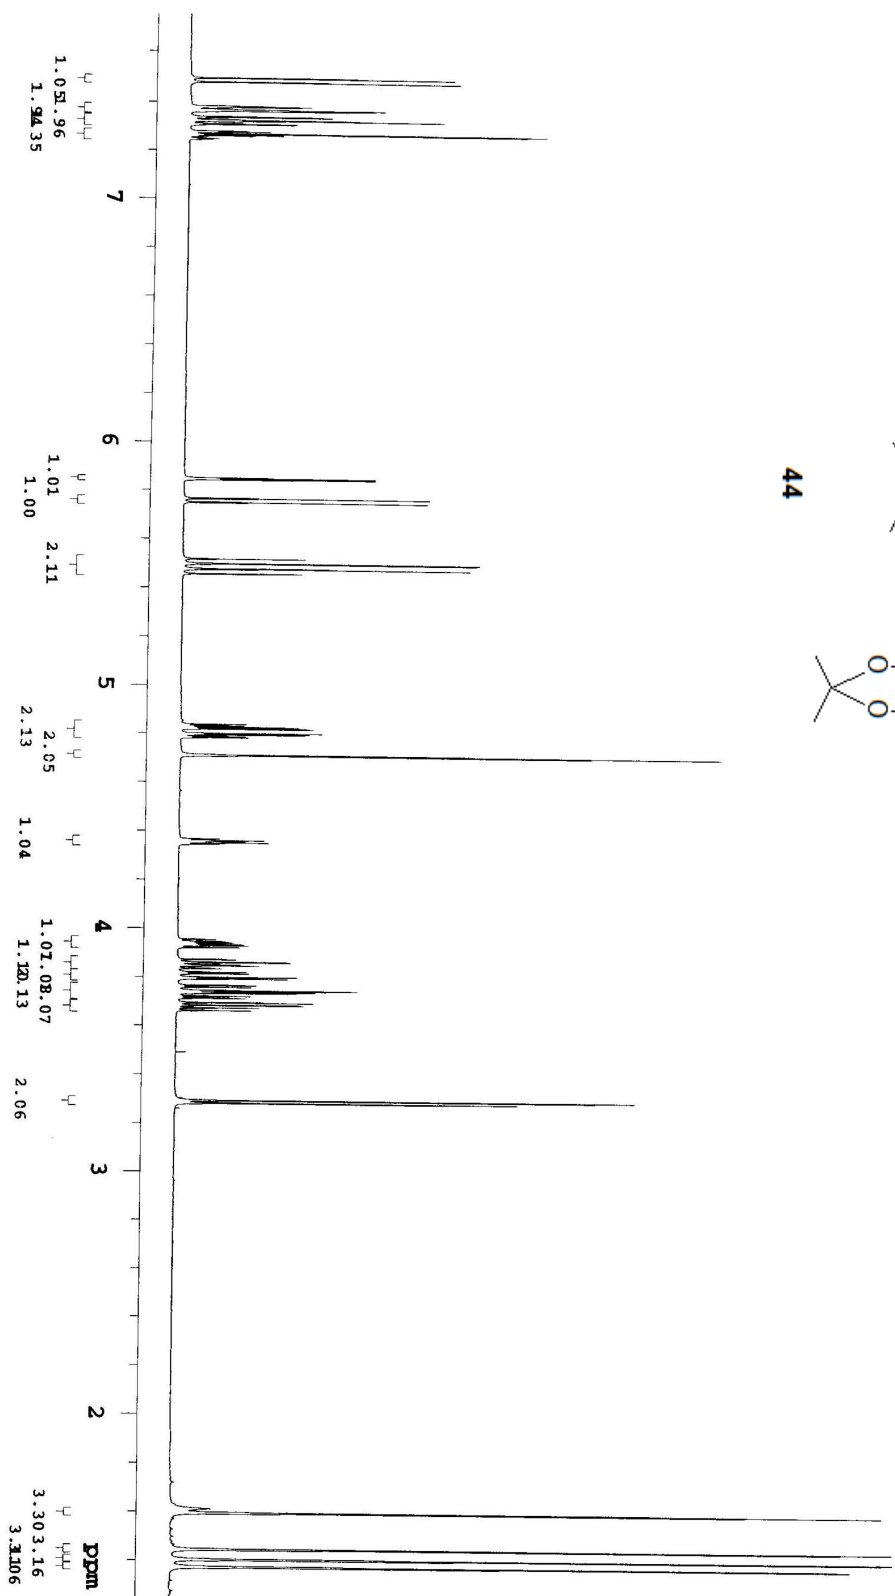

125.693 MHz  $^{13}\text{C}\{^1\text{H}\}$  apt in  $\text{cdcl}_3$  (ref. to  $\text{CDCl}_3$  @ 77.06 ppm), temp 26.1 C -> actual temp = 27.0 C, autotxdrb probe  
 C & CH2 same, CH & CH3 opposite side of solvent signal  
 Pulse Sequence: apt

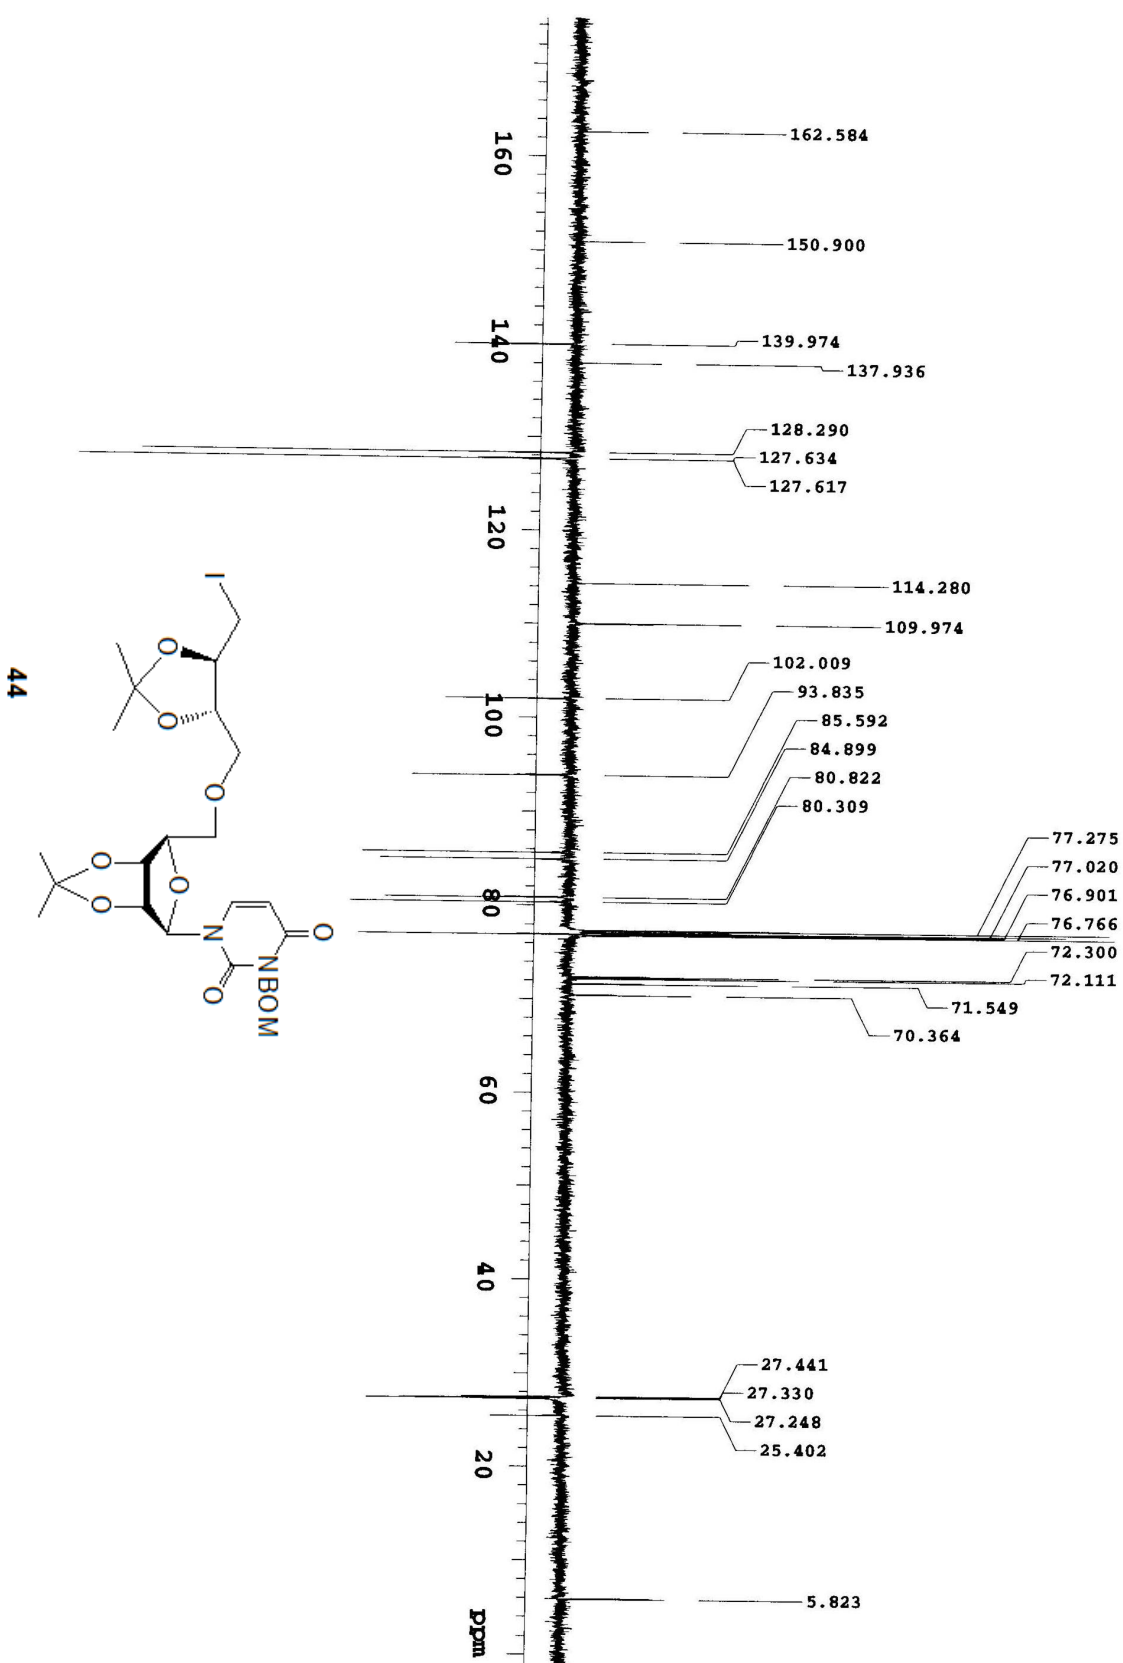

500 MHz 1D in CD<sub>3</sub>OD (ref. to CD<sub>3</sub>OD @ 3.30 ppm), temp 26.1 C -> actual temp = 27.0 C, autoxchg probe  
Pulse Sequence: presat

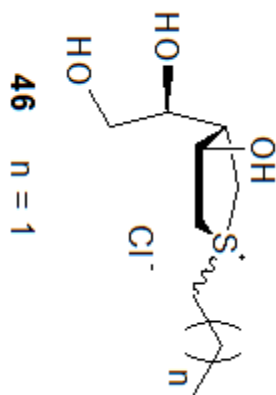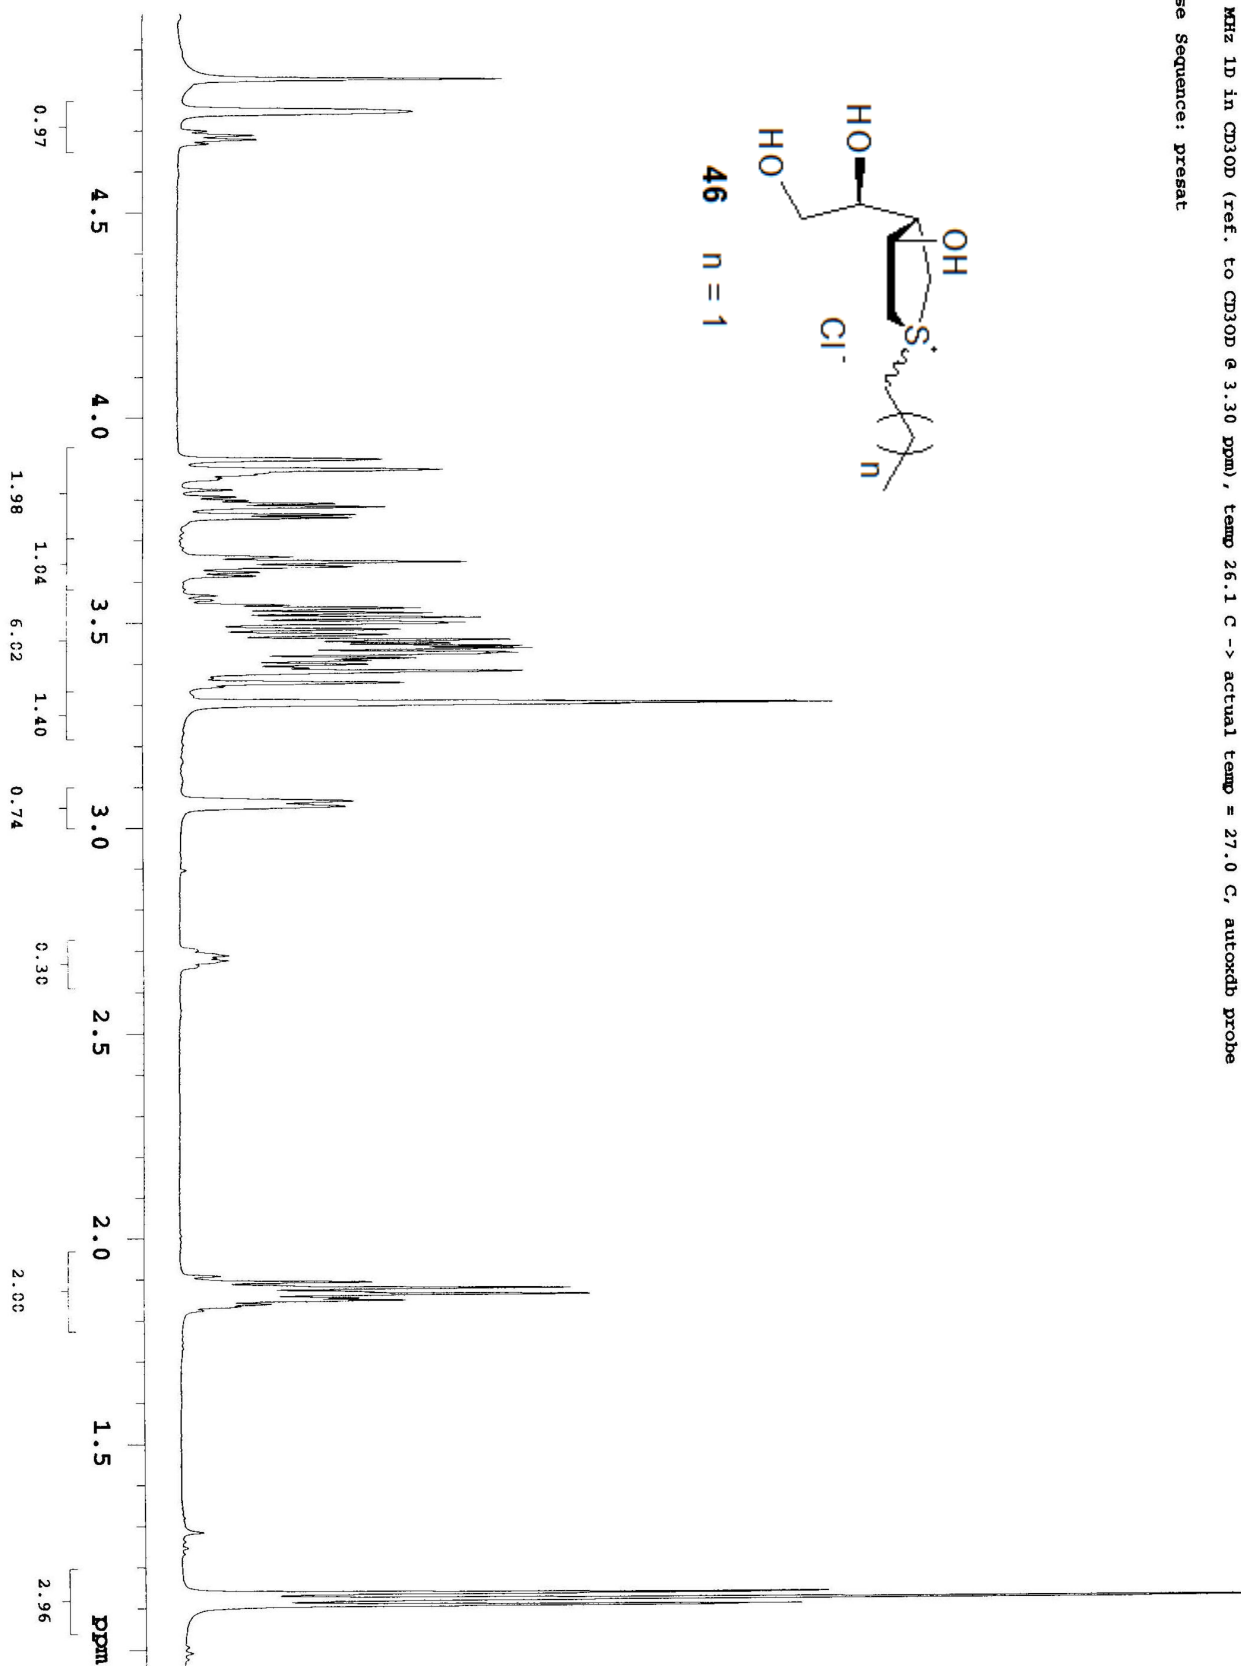

125.694 MHz  $^{13}\text{C}\{^1\text{H}\}$  apt in cd3od (ref. to  $\text{CD}_3\text{OD}$  @ 49.0 ppm), temp 26.1 C -> actual temp = 27.0 C, autoxdb probe  
 C & CH2 same, CH & CH3 opposite side of solvent signal  
 Pulse Sequence: apt

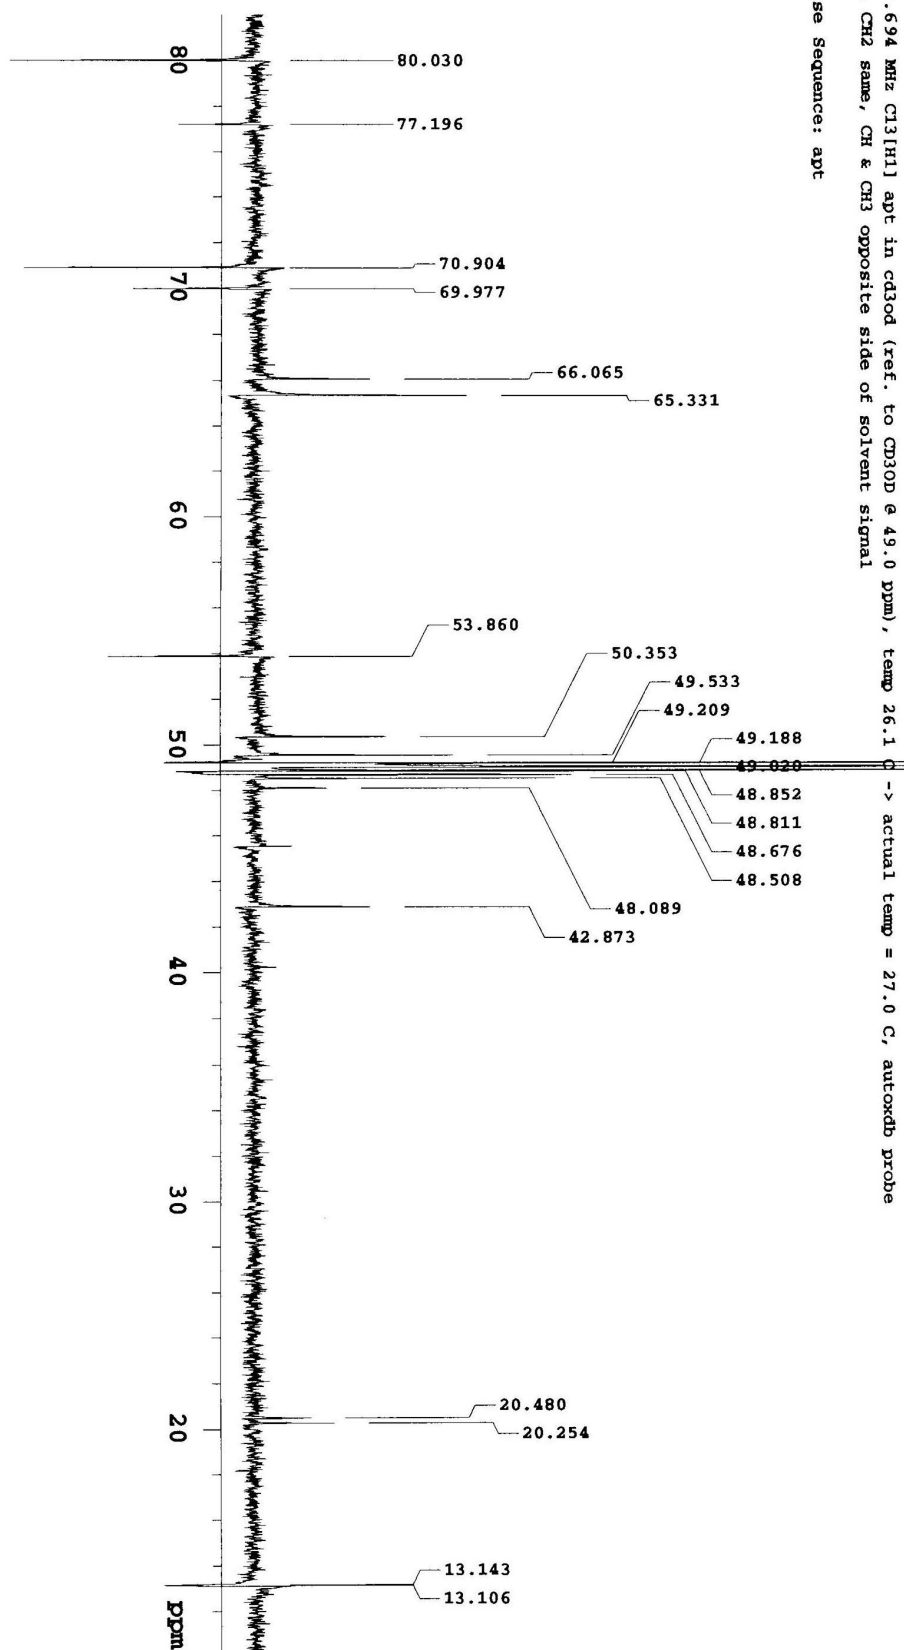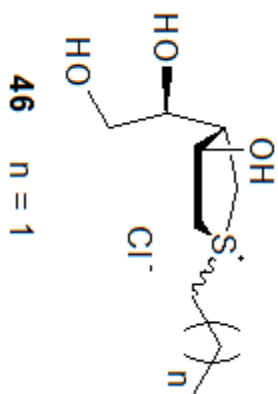

399.796 MHz <sup>1</sup>H 1D in CD<sub>3</sub>OD (ref. to CD<sub>3</sub>OD @ 3.30 ppm), temp 26.5 C -> actual temp = 27.0 C, autoxchd probe  
Pulse Sequence: s2pul

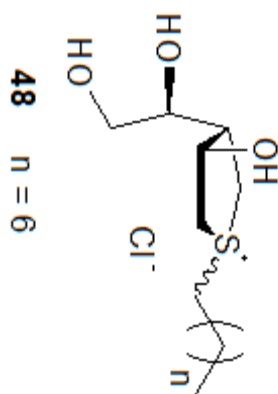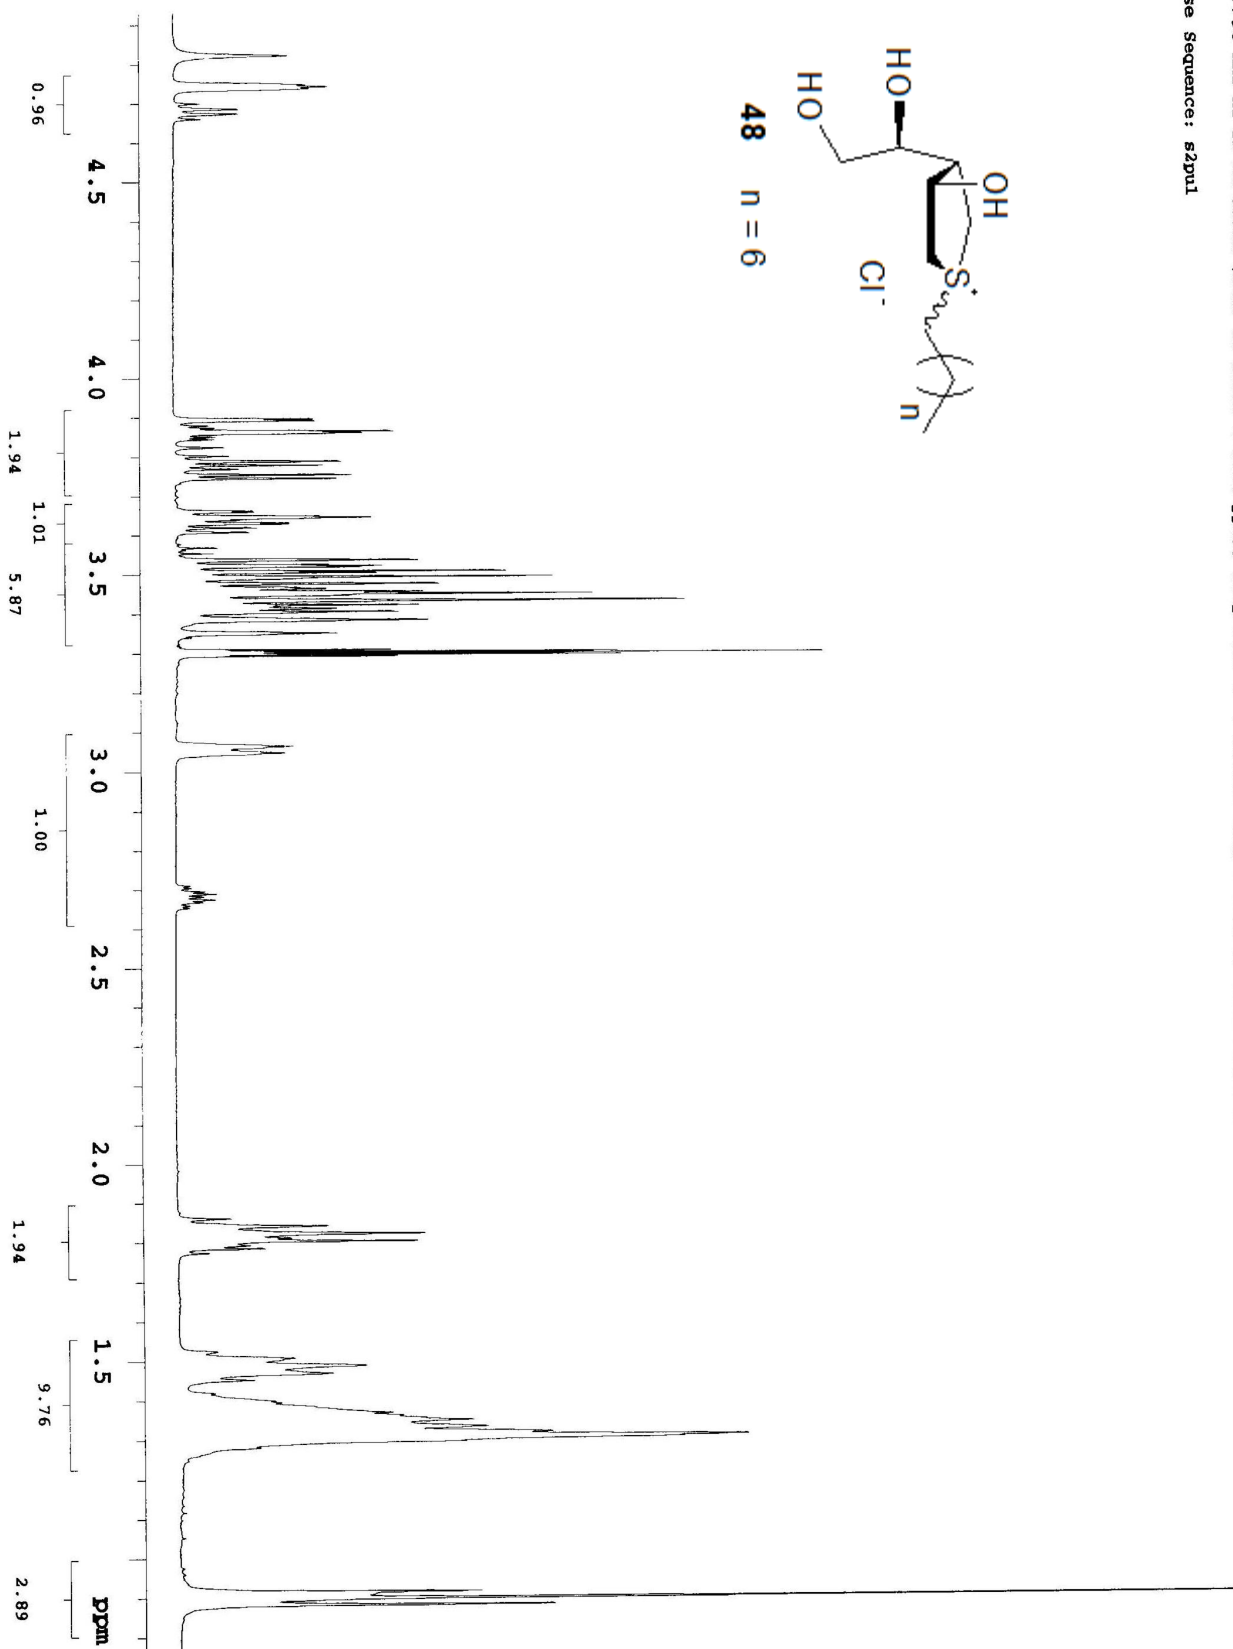

125.267 MHz  $^{13}\text{C}\{^1\text{H}\}$  apt in  $\text{cd}_3\text{od}$  (ref. to  $\text{CD}_3\text{OD}$  @ 49.0 ppm), temp 27.2 C -> actual temp = 27.0 C, autokdb probe  
 C & CH2 same, CH & CH3 opposite side of solvent signal  
 Pulse Sequence: apt

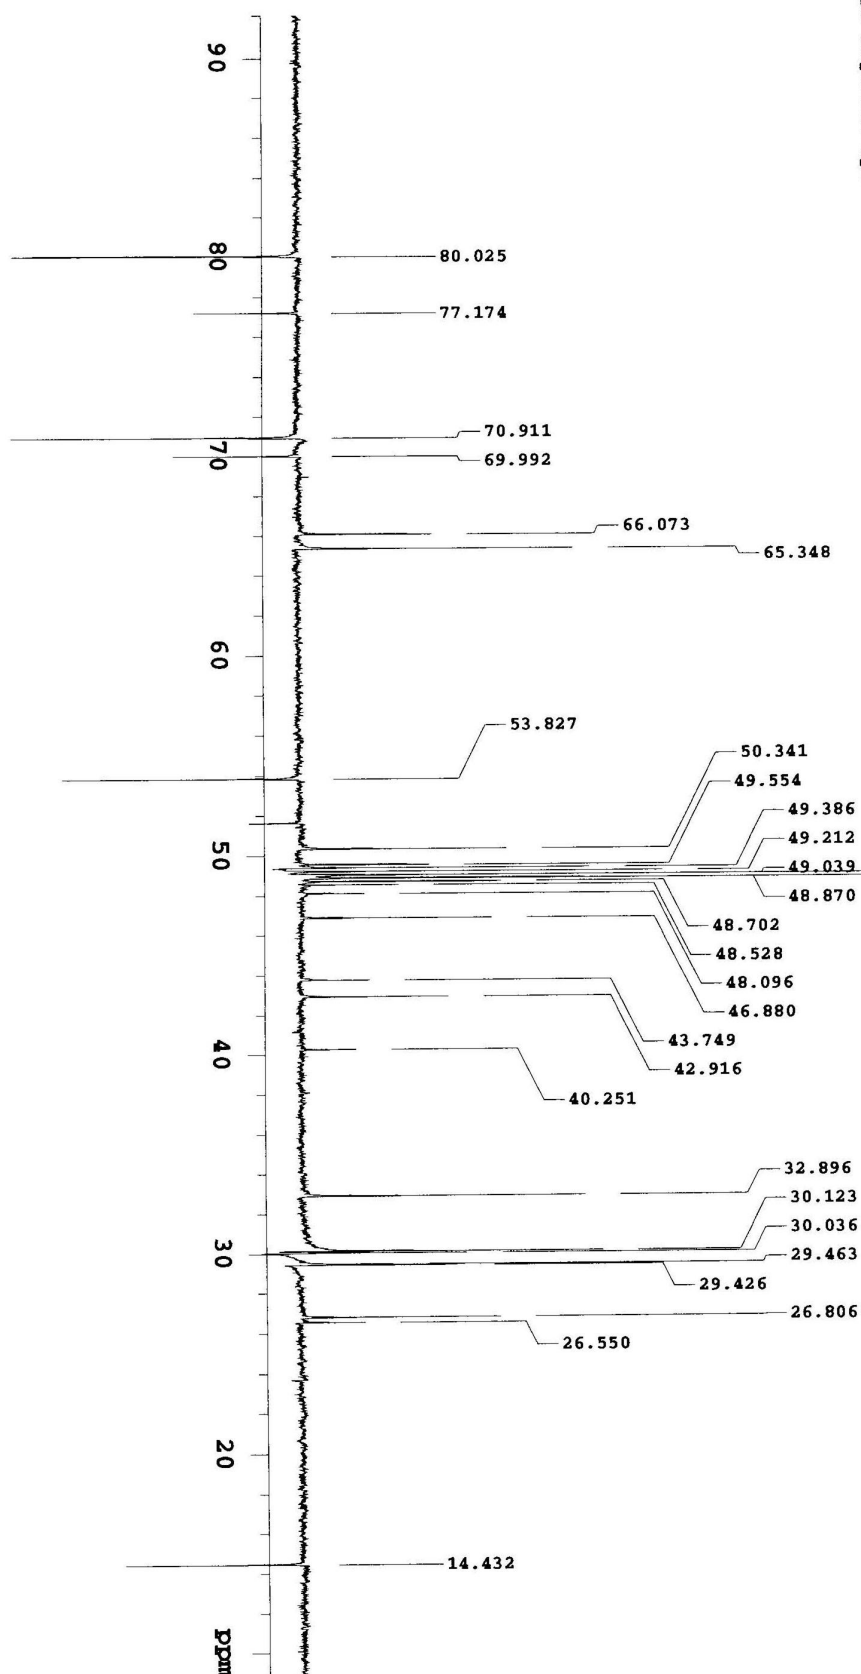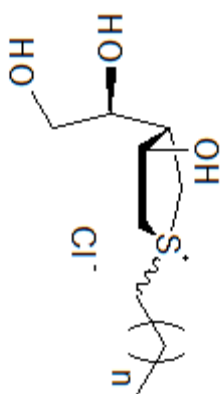

48 n = 6

399.796 MHz <sup>1</sup>H 1D in cd3od (ref. to CD3OD @ 3.30 ppm), temp 26.5 C -> actual temp = 27.0 C, autoxdt probe  
Pulse Sequence: s2pu1

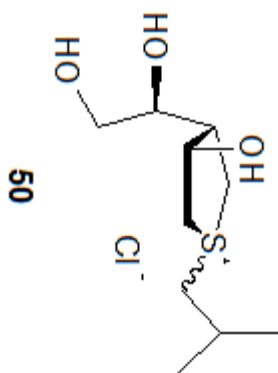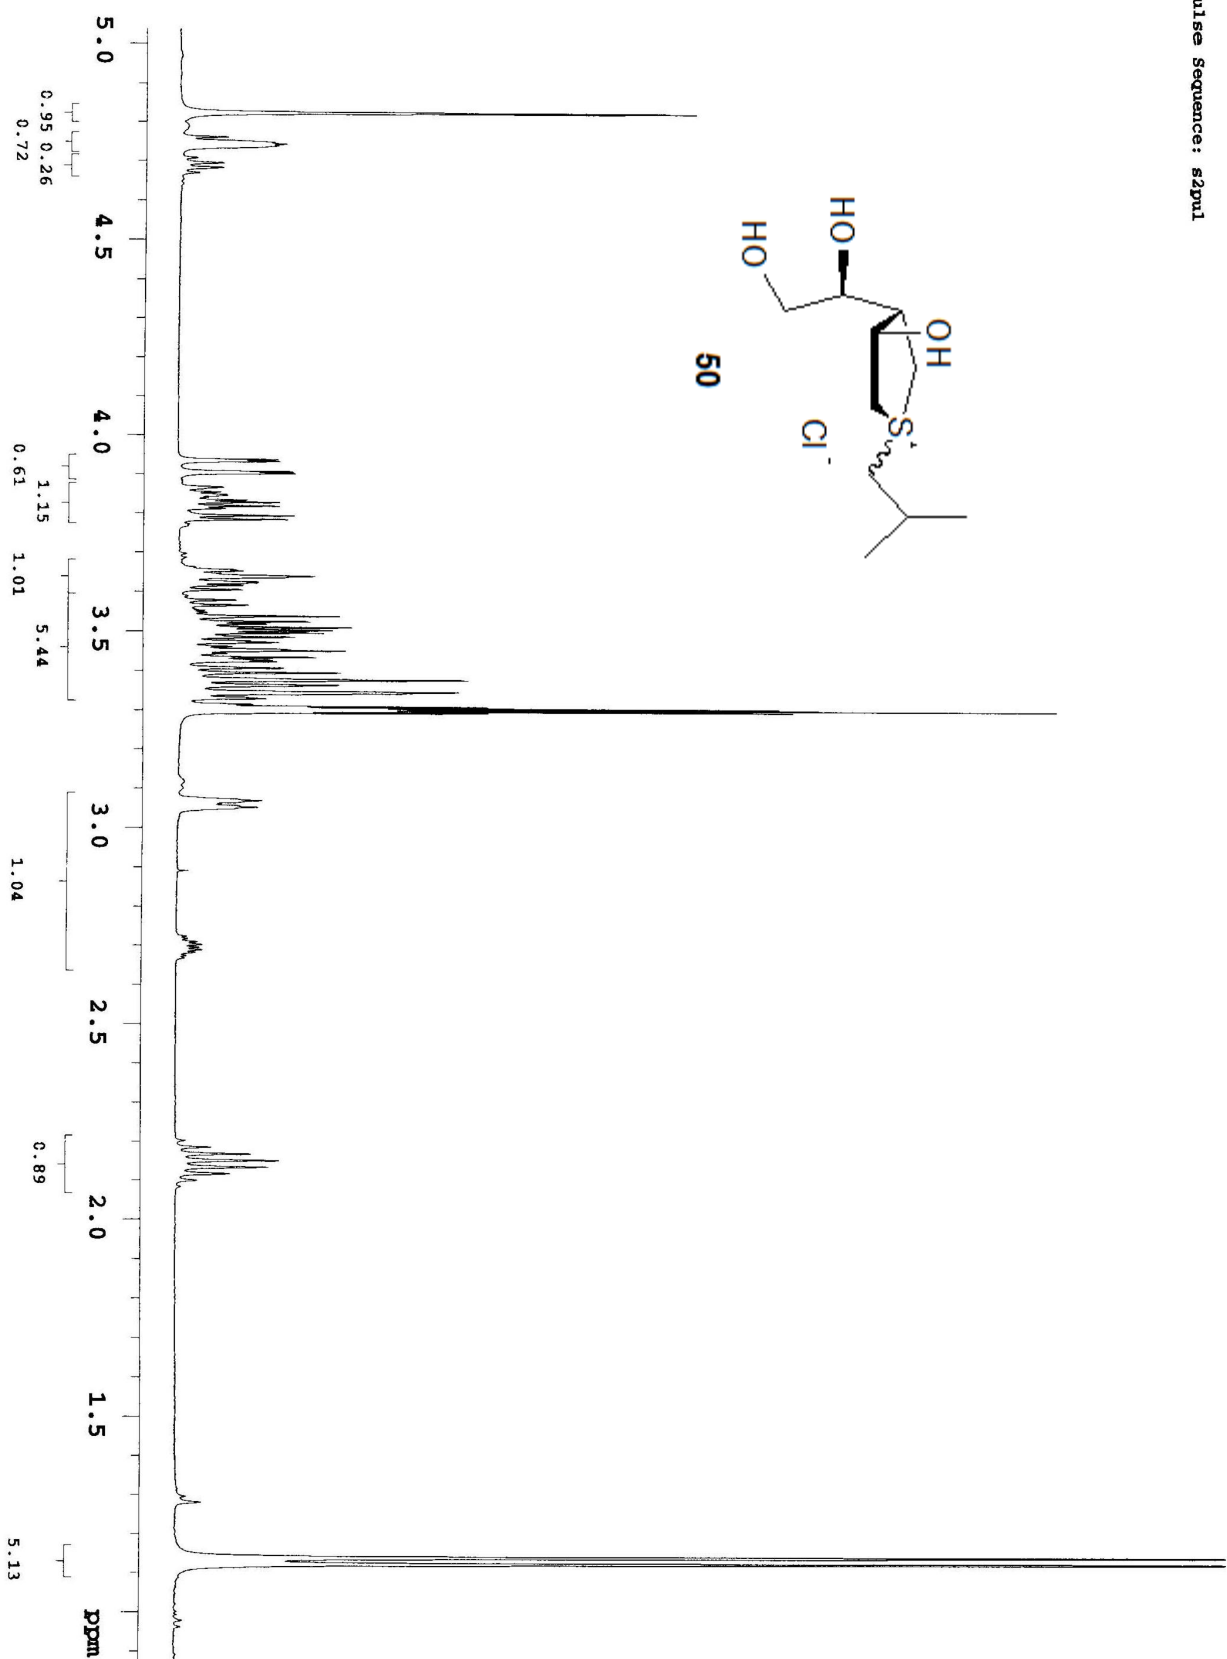



125.694 MHz  $^{13}\text{C}\{^1\text{H}\}$  apt in  $\text{cd}_3\text{od}$  (ref. to  $\text{CD}_3\text{OD}$  @ 49.0 ppm), temp 26.1 C -> actual temp = 27.0 C, autoxdb probe  
 C &  $\text{CH}_2$  same, CH &  $\text{CH}_3$  opposite side of solvent signal  
 Pulse Sequence: apt

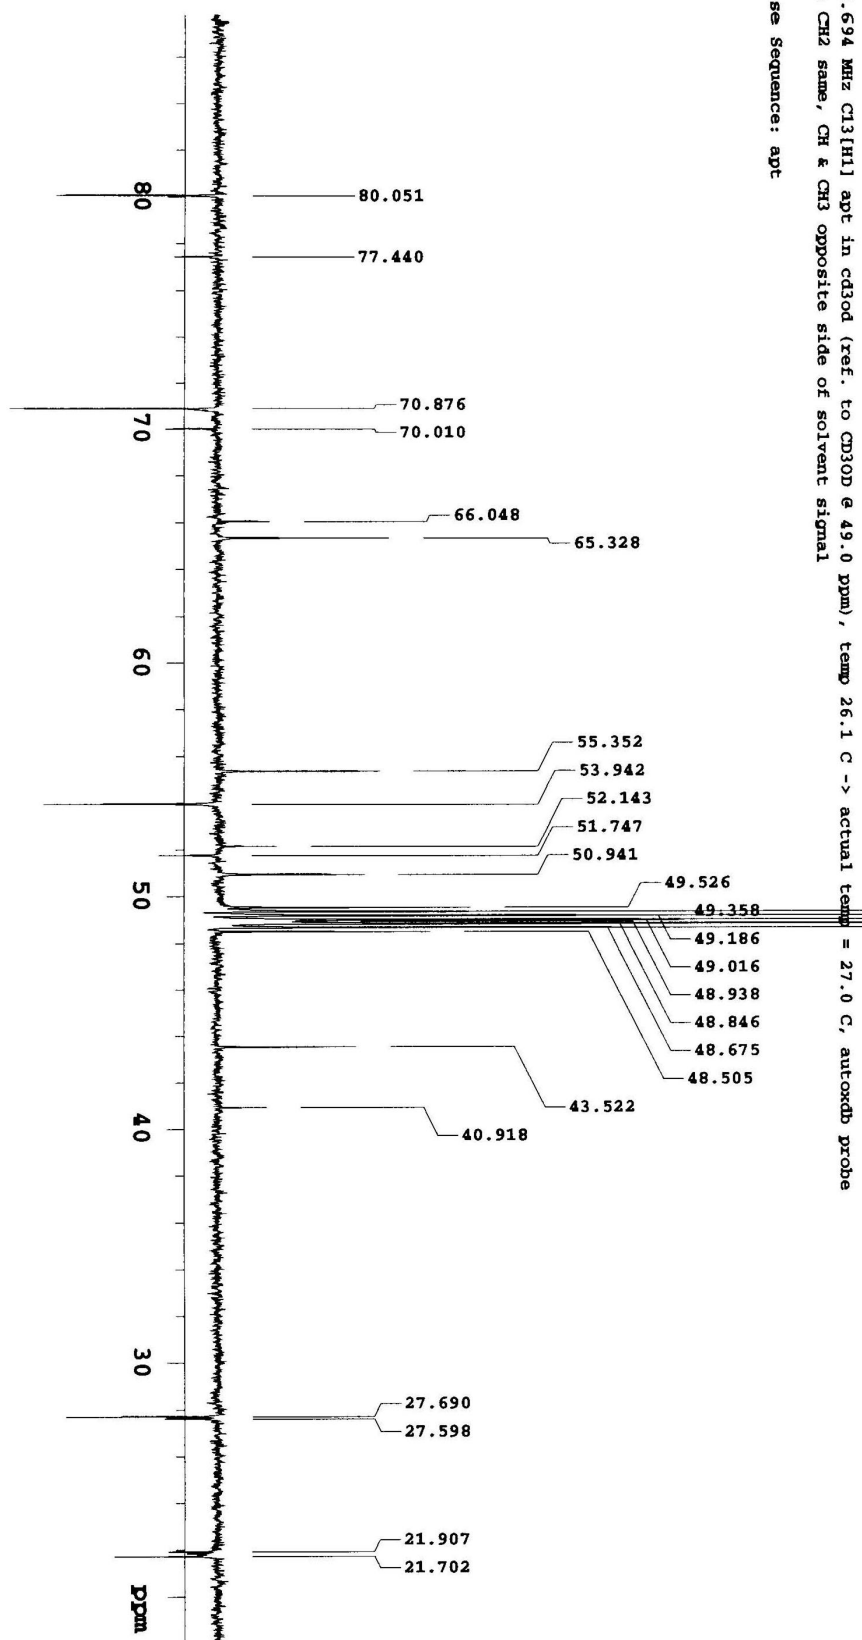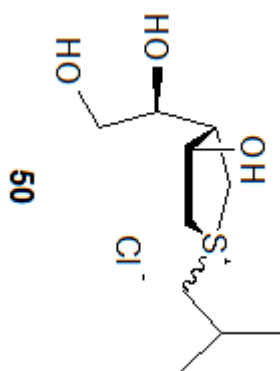

50

599.934 MHz H1 1D in cd3od (ref. to CD3OD @ 3.30 ppm), temp 28.0 C -> actual temp = 27.0 C, id600 probe  
Pulse Sequence: s2pru1

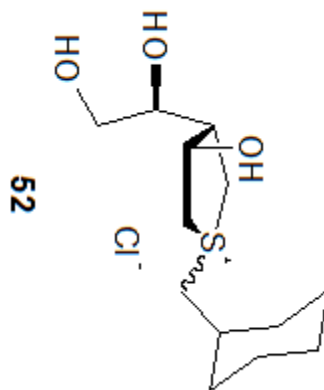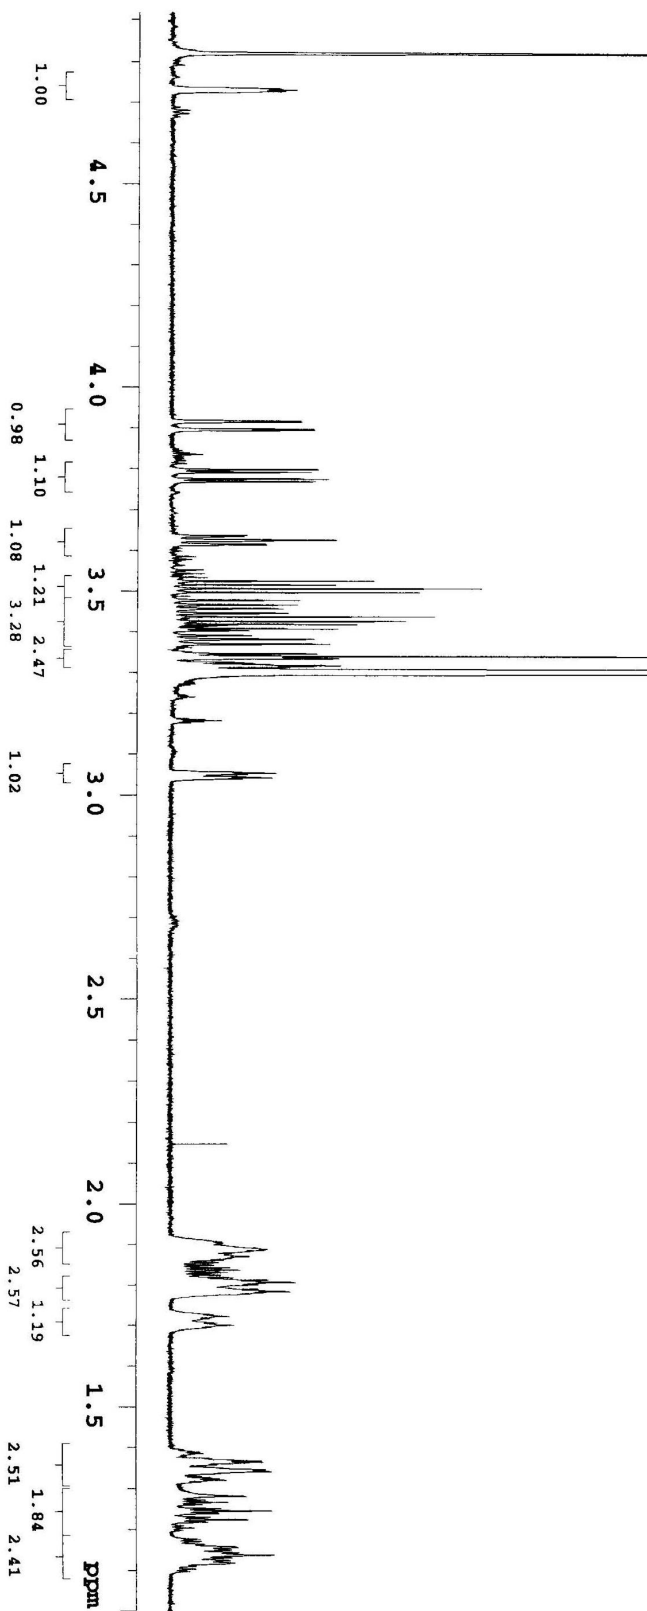

100.540 MHz  $^{13}\text{C}\{^1\text{H}\}$  apt in  $\text{cd}_3\text{od}$  (ref. to  $\text{CD}_3\text{OD}$  @ 49.0 ppm), temp 26.5  
 C & CH2 same, CH & CH3 opposite side of solvent signal  
 Pulse Sequence: apt

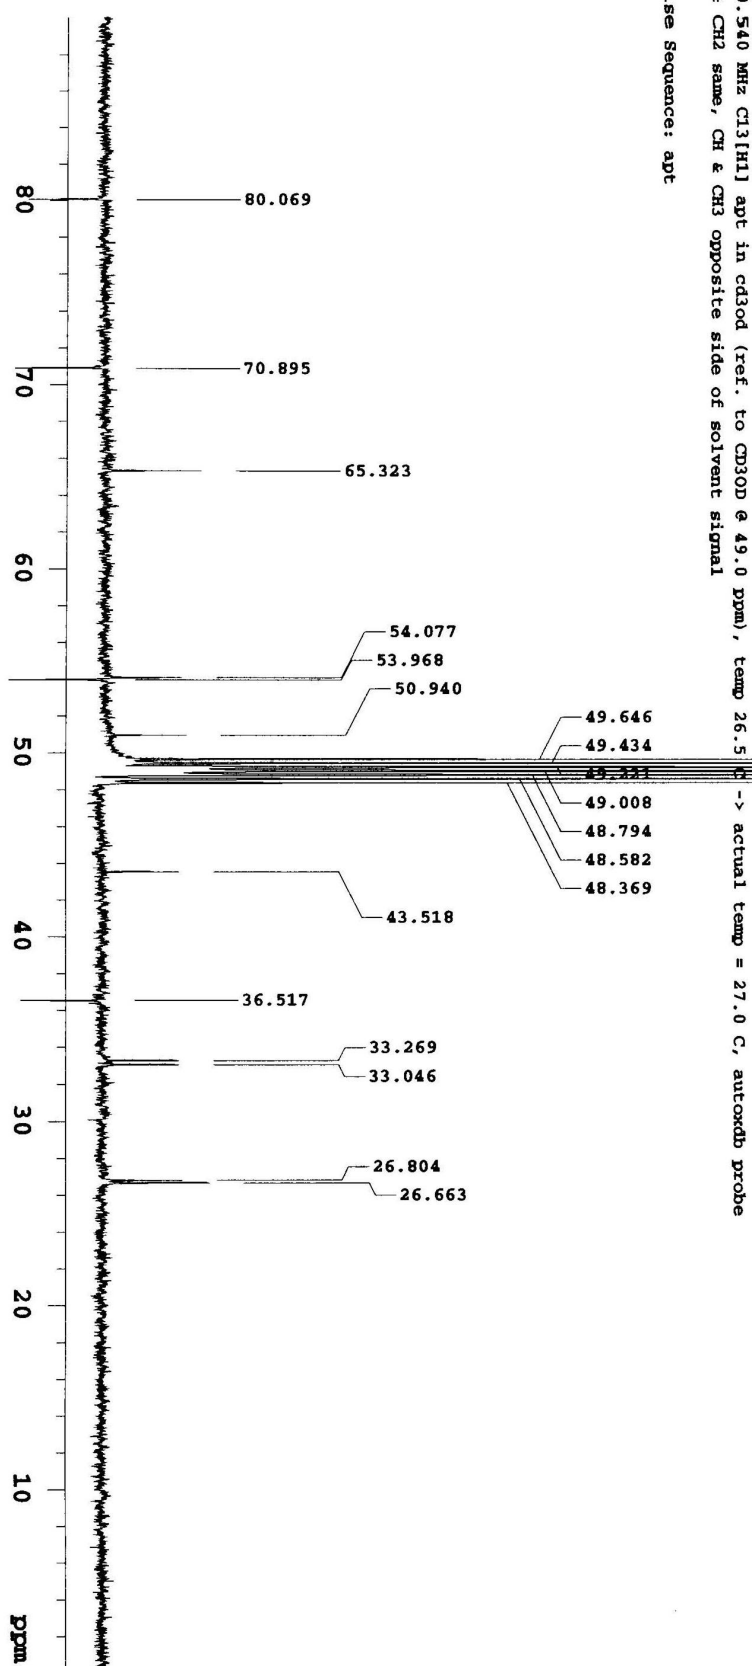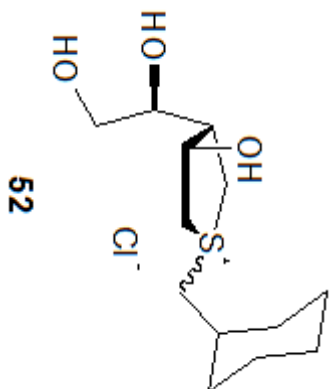

52

539.534 MHz <sup>1</sup>H 1D in cd3od (ref. to CD3OD @ 3.30 ppm), temp 28.0 C -> actual temp = 27.0 C, id600 probe  
Pulse Sequence: s2pul

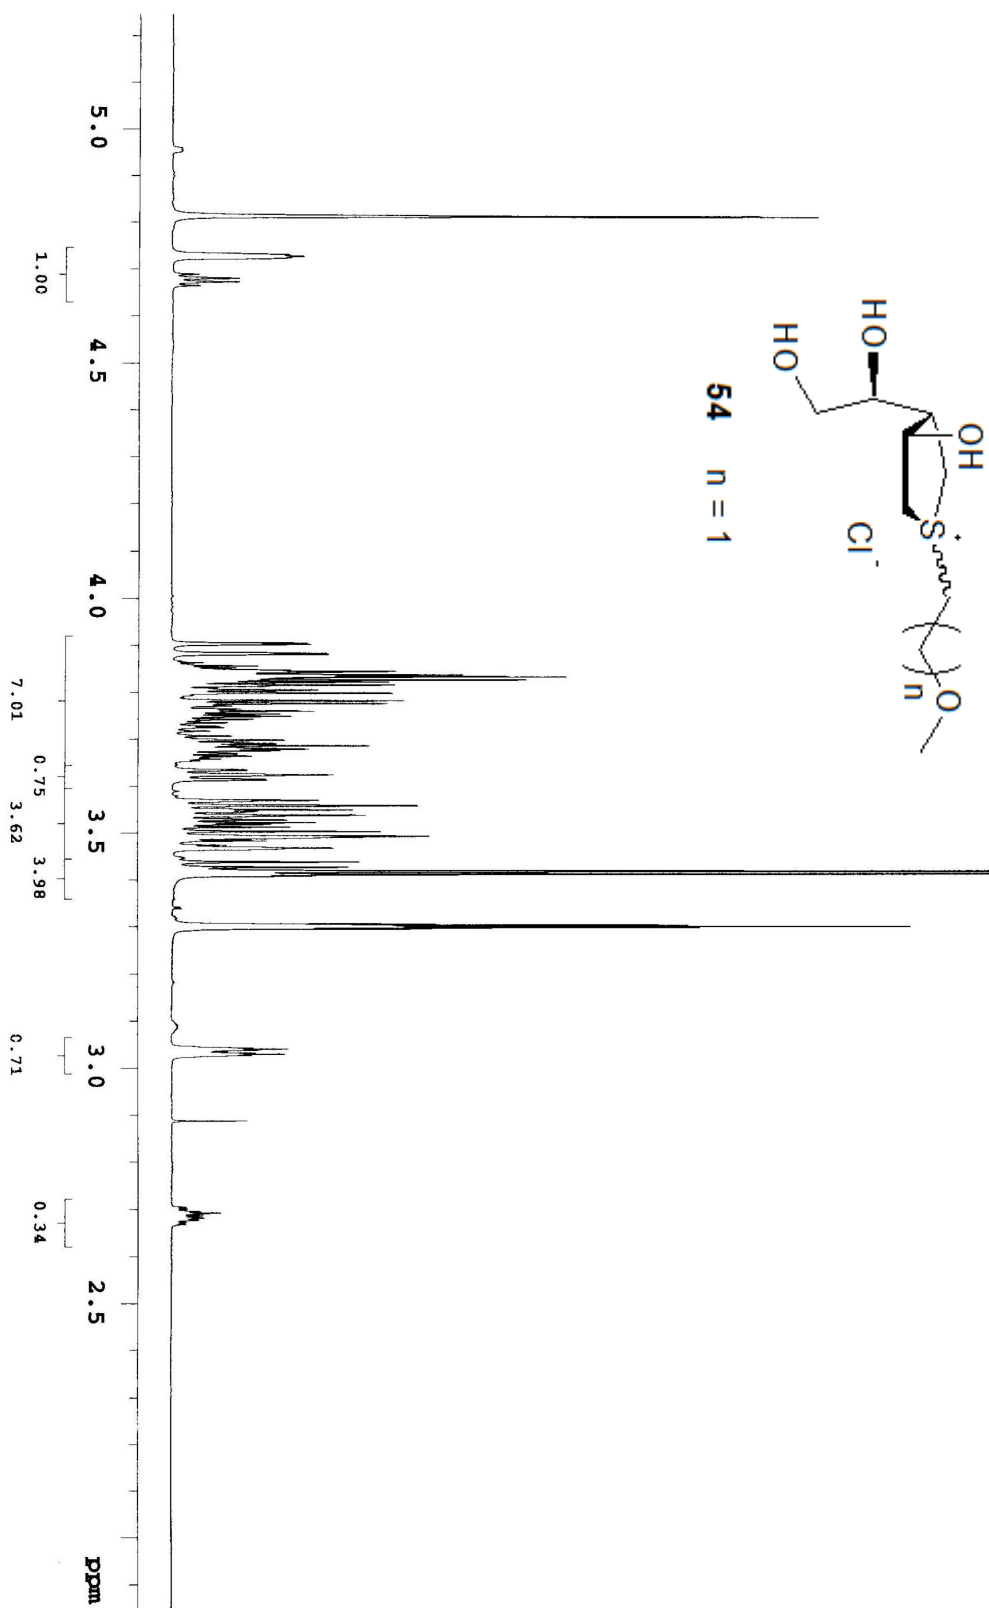

Pulse Sequence: apt

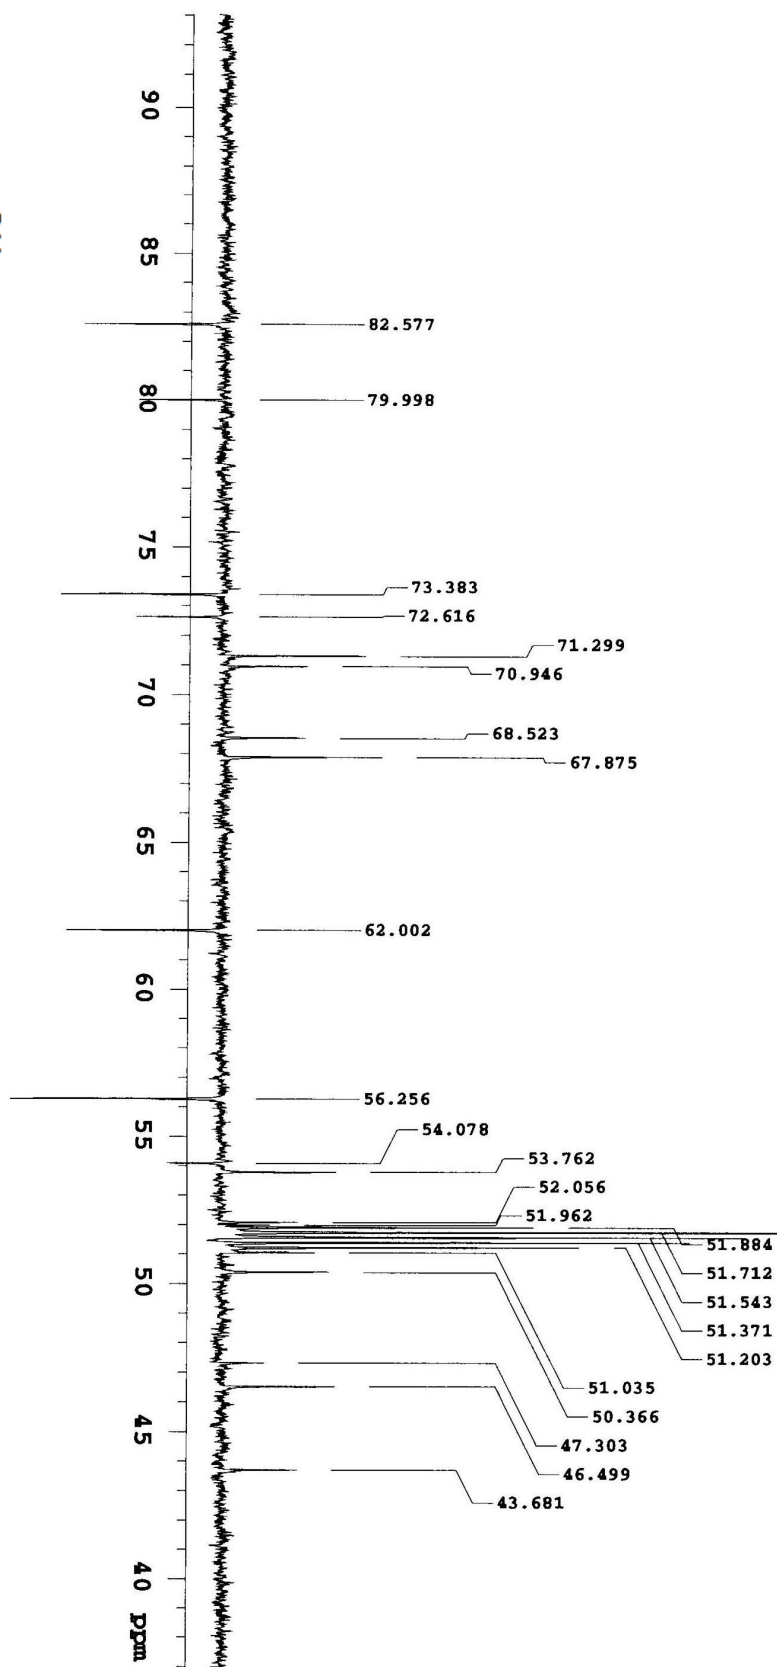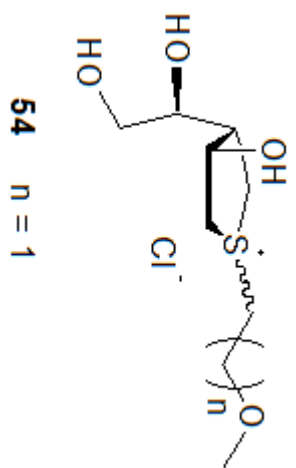

54  $n = 1$

498.124 MHz <sup>1</sup>H 1D in cd3od (ref. to CD3OD @ 3.30 ppm), temp 27.2 C -> actual temp = 27.0 C, autoxgb probe  
Pulse Sequence: szpul

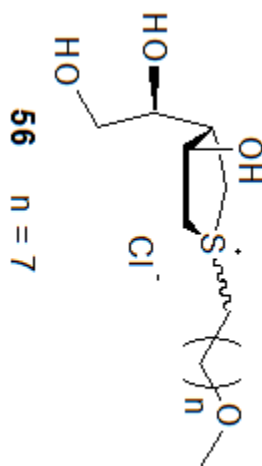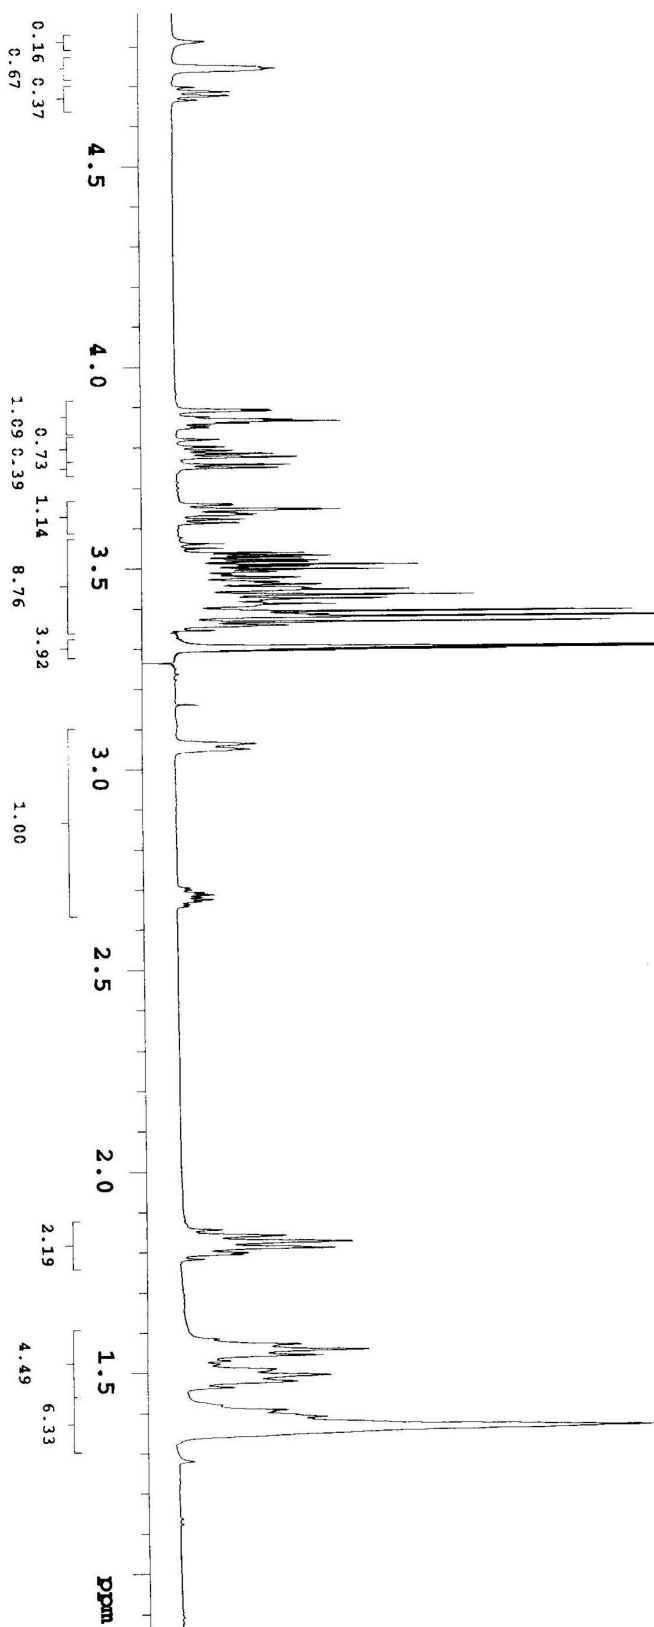

100.540 MHz  $^{13}\text{C}$  [H] apt in  $\text{cd}_3\text{od}$  (ref. to  $\text{CD}_3\text{OD}$  @ 49.0 ppm), temp 26.5  $^\circ\text{C}$  -> actual temp = 27.0  $^\circ\text{C}$ , autoxzb probe  
 C & CH2 same, CH & CH3 opposite side of solvent signal  
 Pulse Sequence: apt

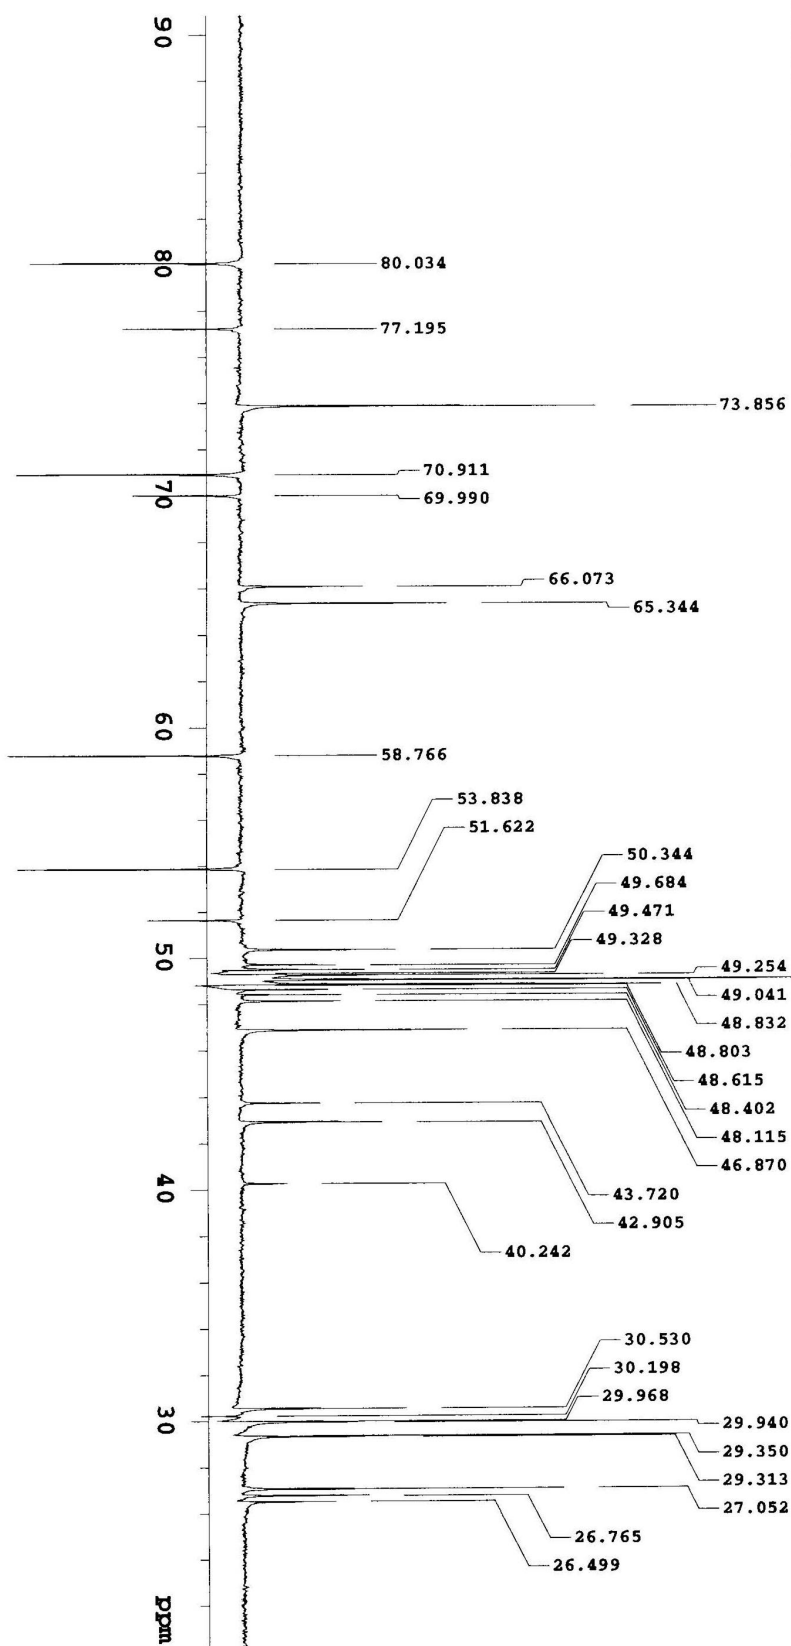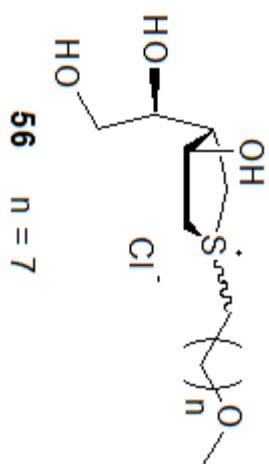

500 MHz 1D in CD3OD (ref. to CD3OD @ 3.30 ppm), temp 26.1 C -> actual temp = 27.0 C, autokxnb probe  
Pulse Sequence: presat

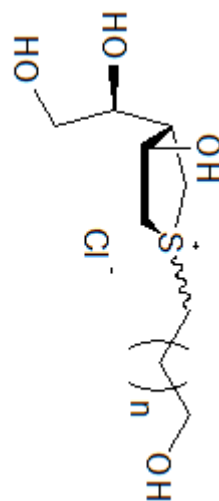

58 n = 1

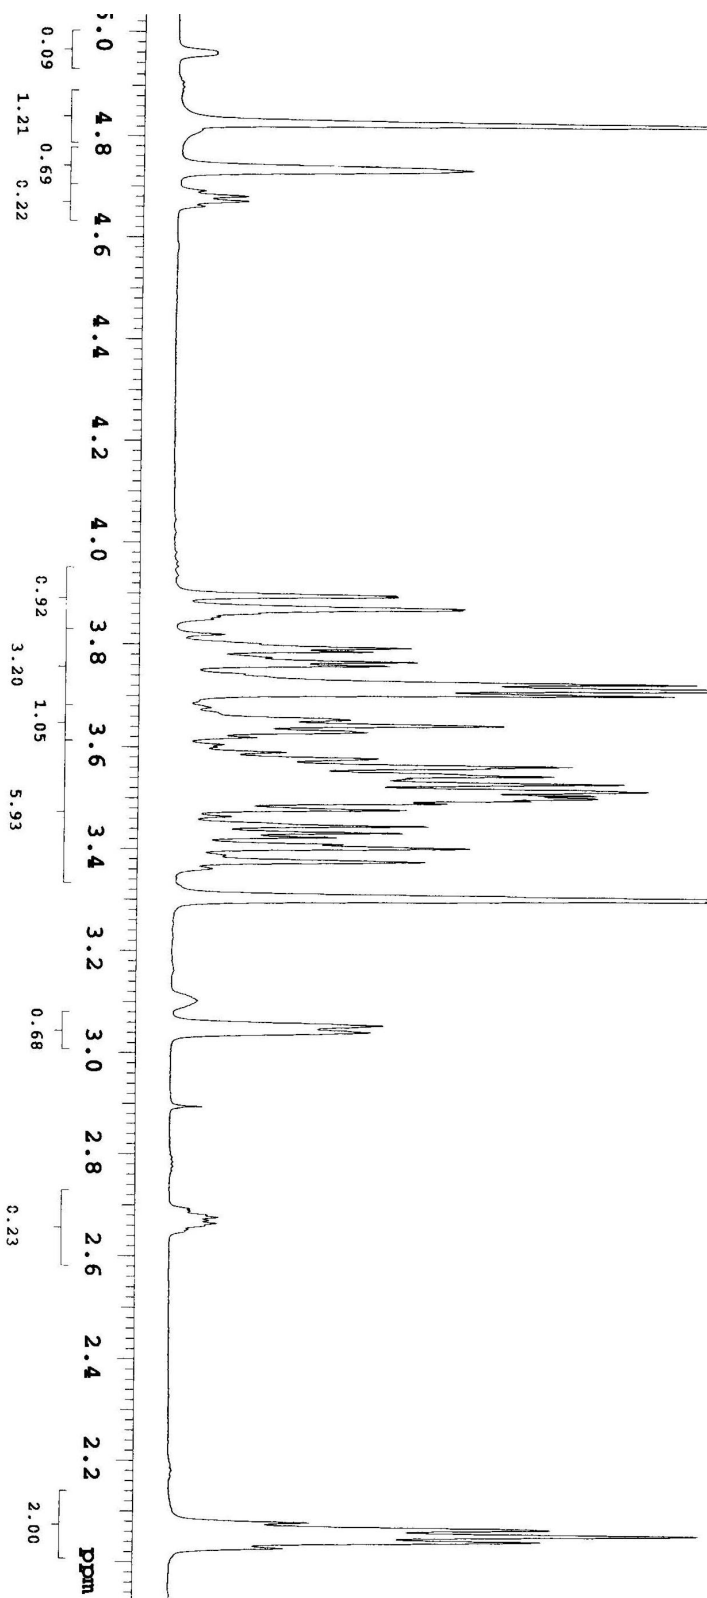



125.266 MHz  $^{13}\text{C}\{^1\text{H}\}$  apt in  $\text{d}_2\text{O}$  (ref. to external acetone @ 31.07 ppm), temp 27.2 C -> actual temp = 27.0 C, autoxtdb probe  
C & CH2 same, CH & CH3 opposite side of solvent signal

Pulse Sequence: apt

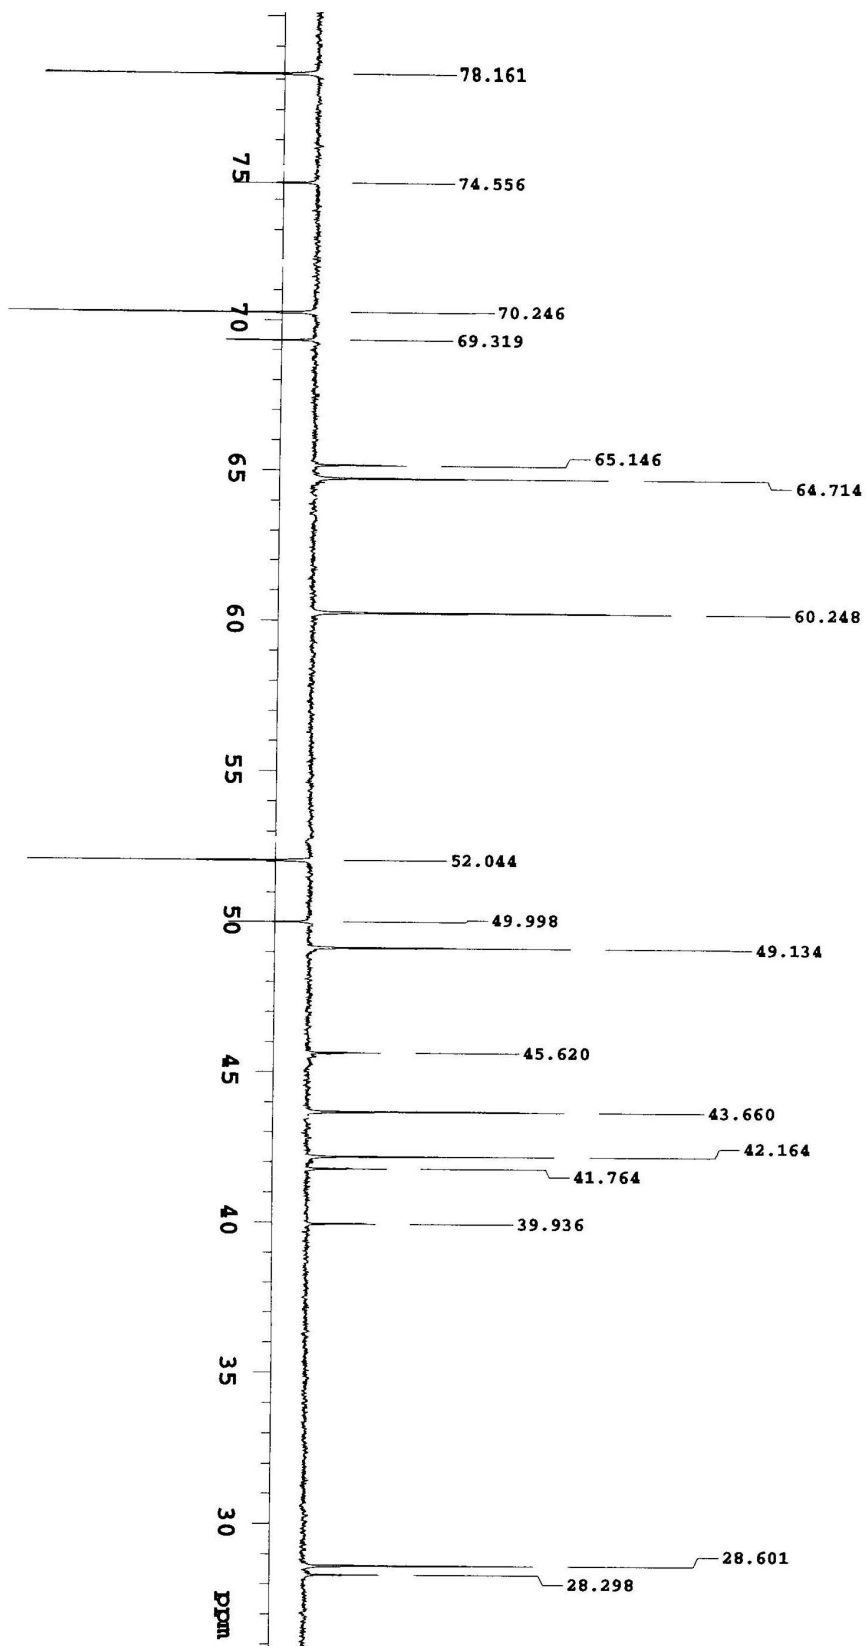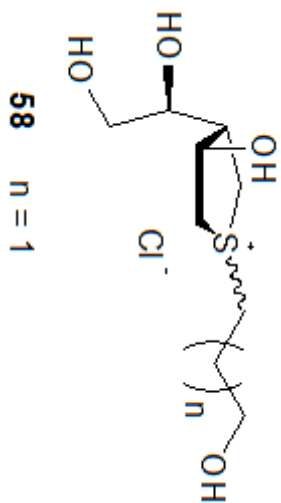

498.124 MHz H1 1D in cd3od (ref. to CD3OD @ 3.30 ppm), temp 27.2 C -> actual temp = 27.0 C, autokdb probe  
Pulse Sequence: szpul

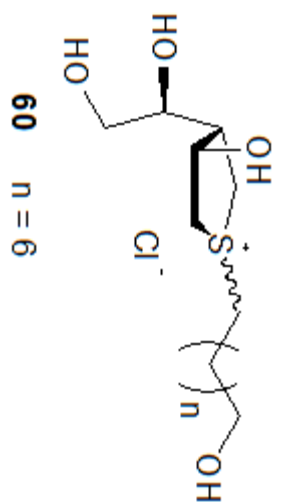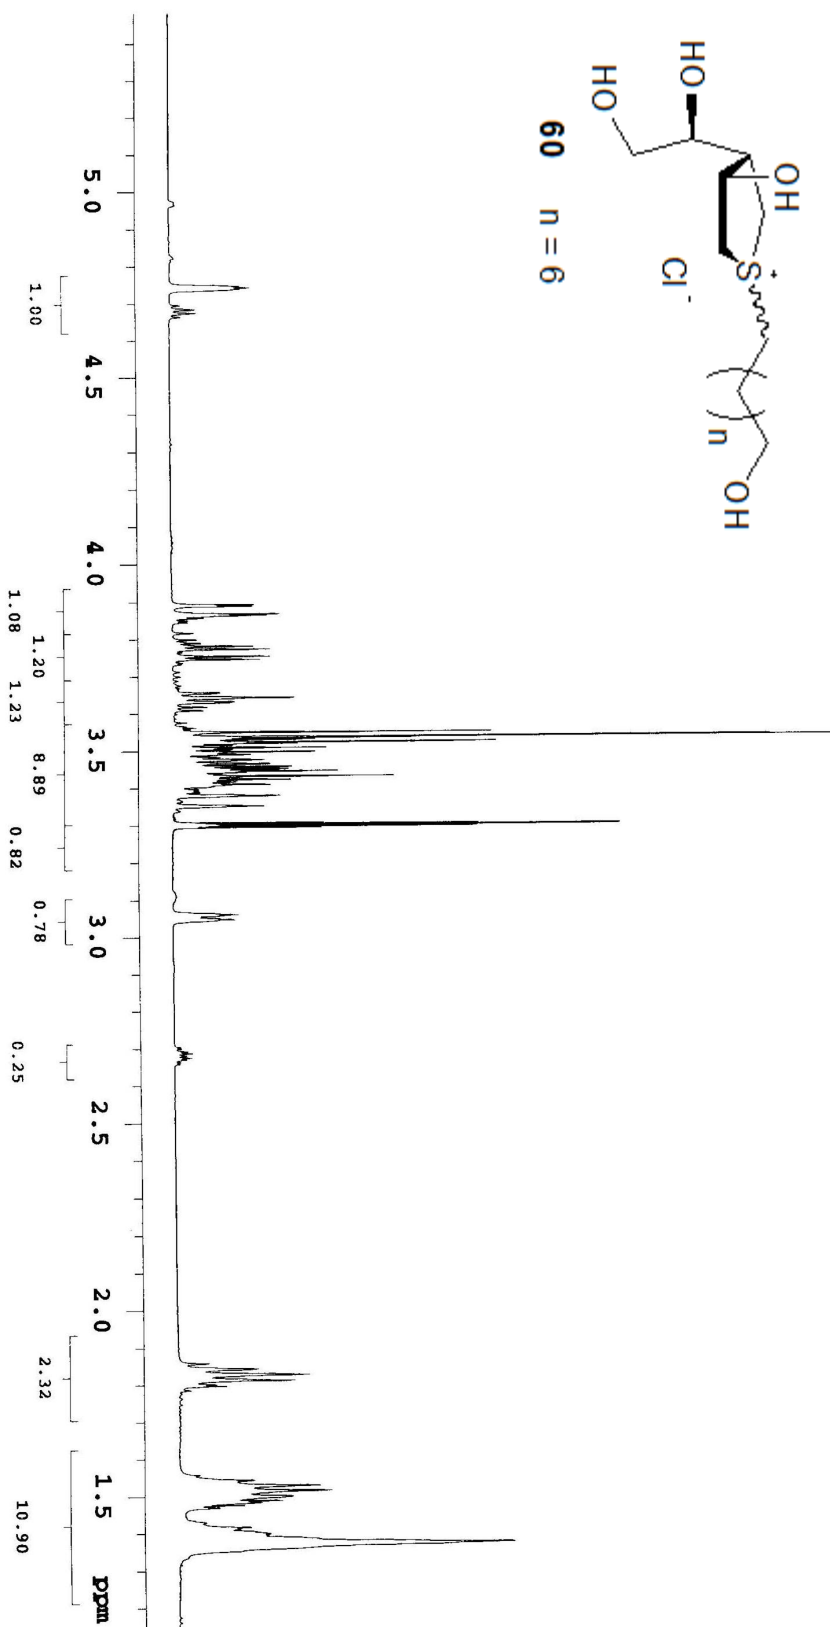

125.694 MHz  $^{13}\text{C}\{^1\text{H}\}$  apt in  $\text{cd}_3\text{od}$  (ref. to  $\text{CD}_3\text{OD}$  @ 49.0 ppm), temp 26.1 C -> actual temp = 27.0 C, autordb probe  
 C & CH2 same, CH & CH3 opposite side of solvent signal  
 Pulse Sequence: apt

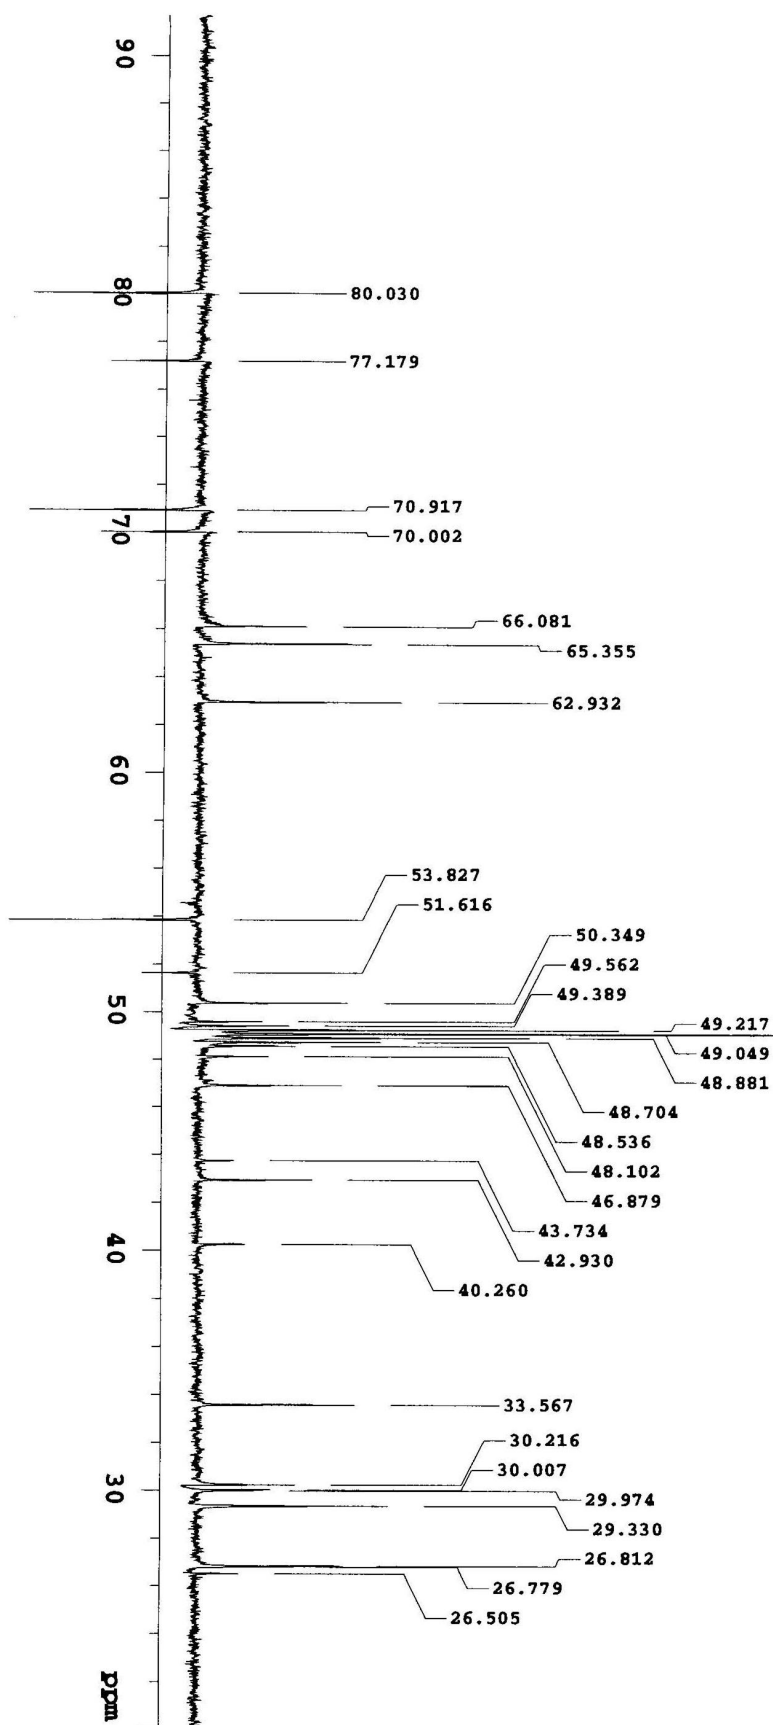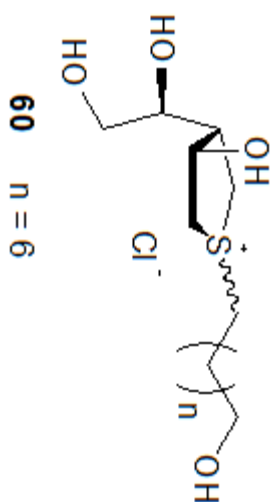

399.796 MHz <sup>1</sup>H 1D in cd3od (ref. to CD3OD @ 3.30 ppm), temp 26.5 C -> actual temp = 27.0 C, autoxdo probe  
Pulse Sequence: s2pul1

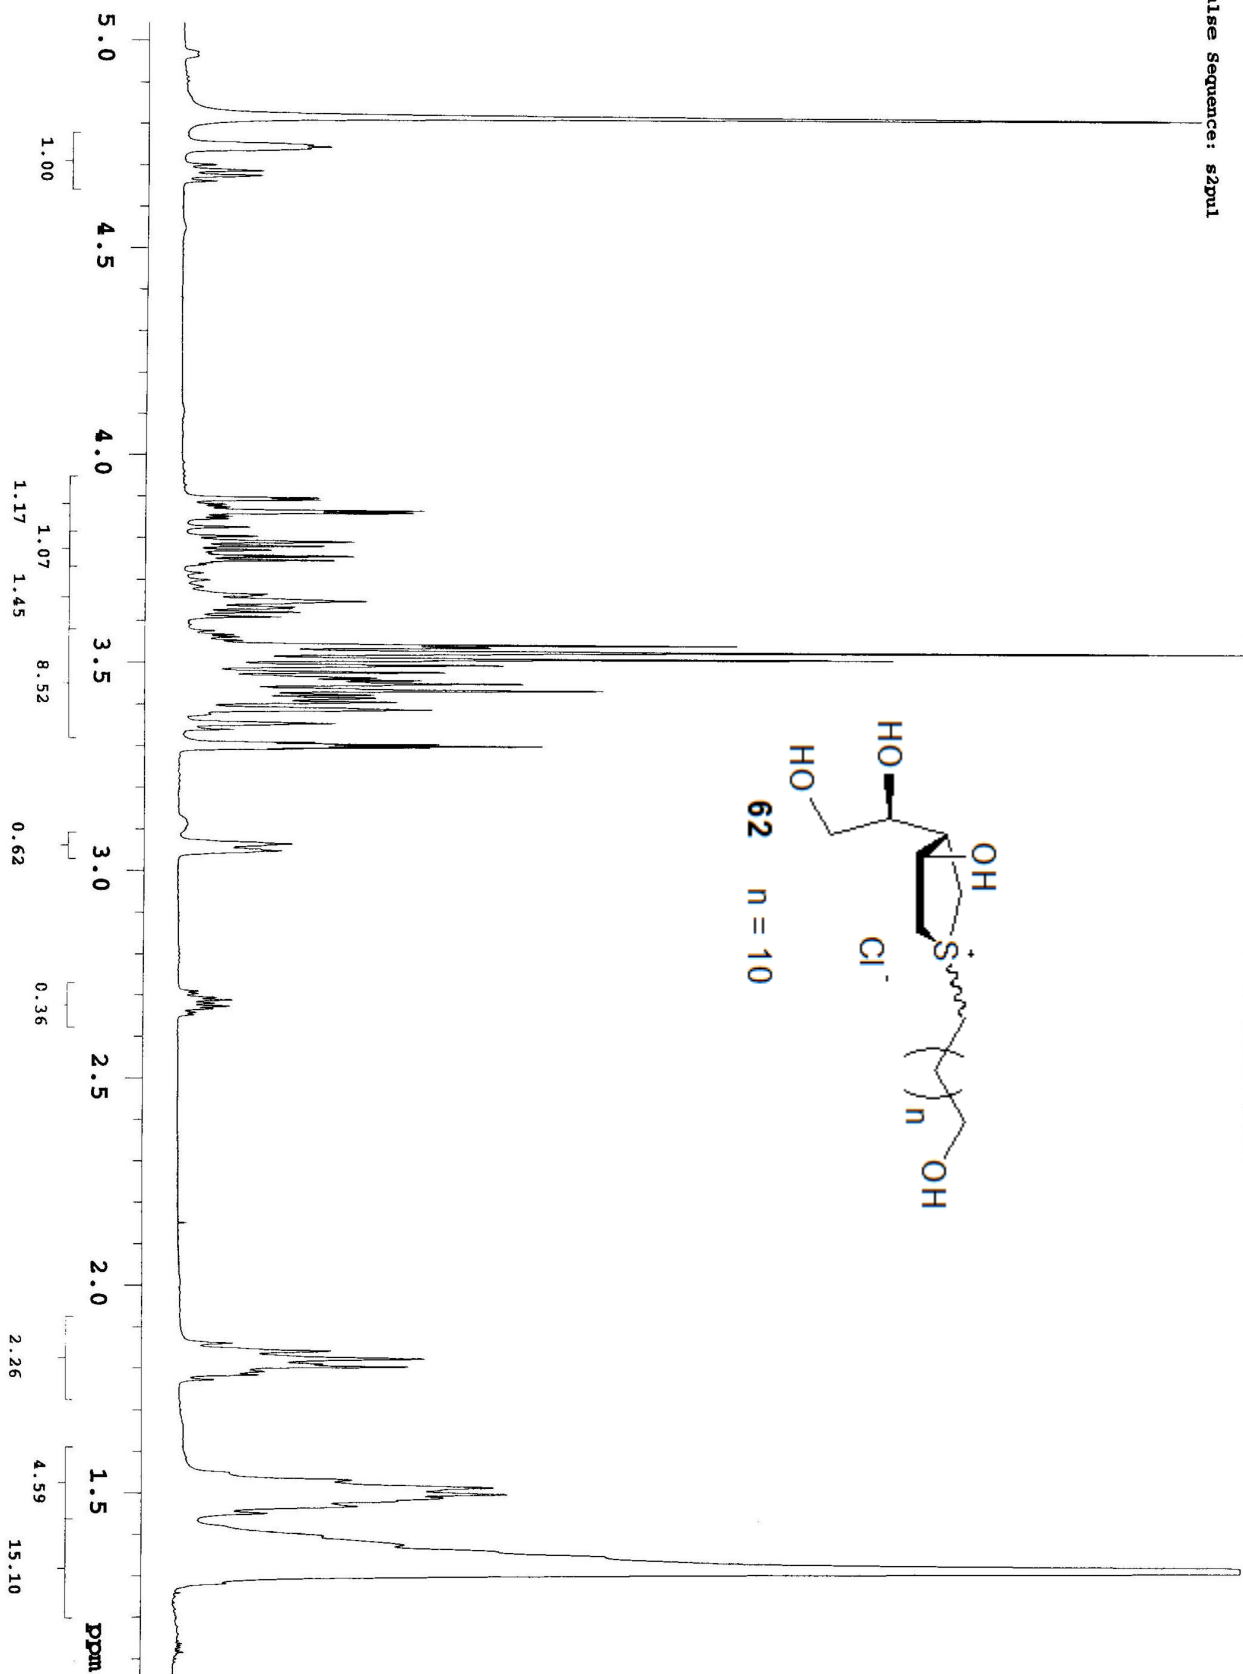

100.540 MHz  $^{13}\text{C}$ [H1] apt in  $\text{cd}_3\text{od}$  (ref. to  $\text{CD}_3\text{OD}$  @ 49.0 ppm), temp 26.5 C -> actual temp = 27.0 C, autowidth probe  
 C & CH2 same, CH & CH3 opposite side of solvent signal  
 Pulse Sequence: apt

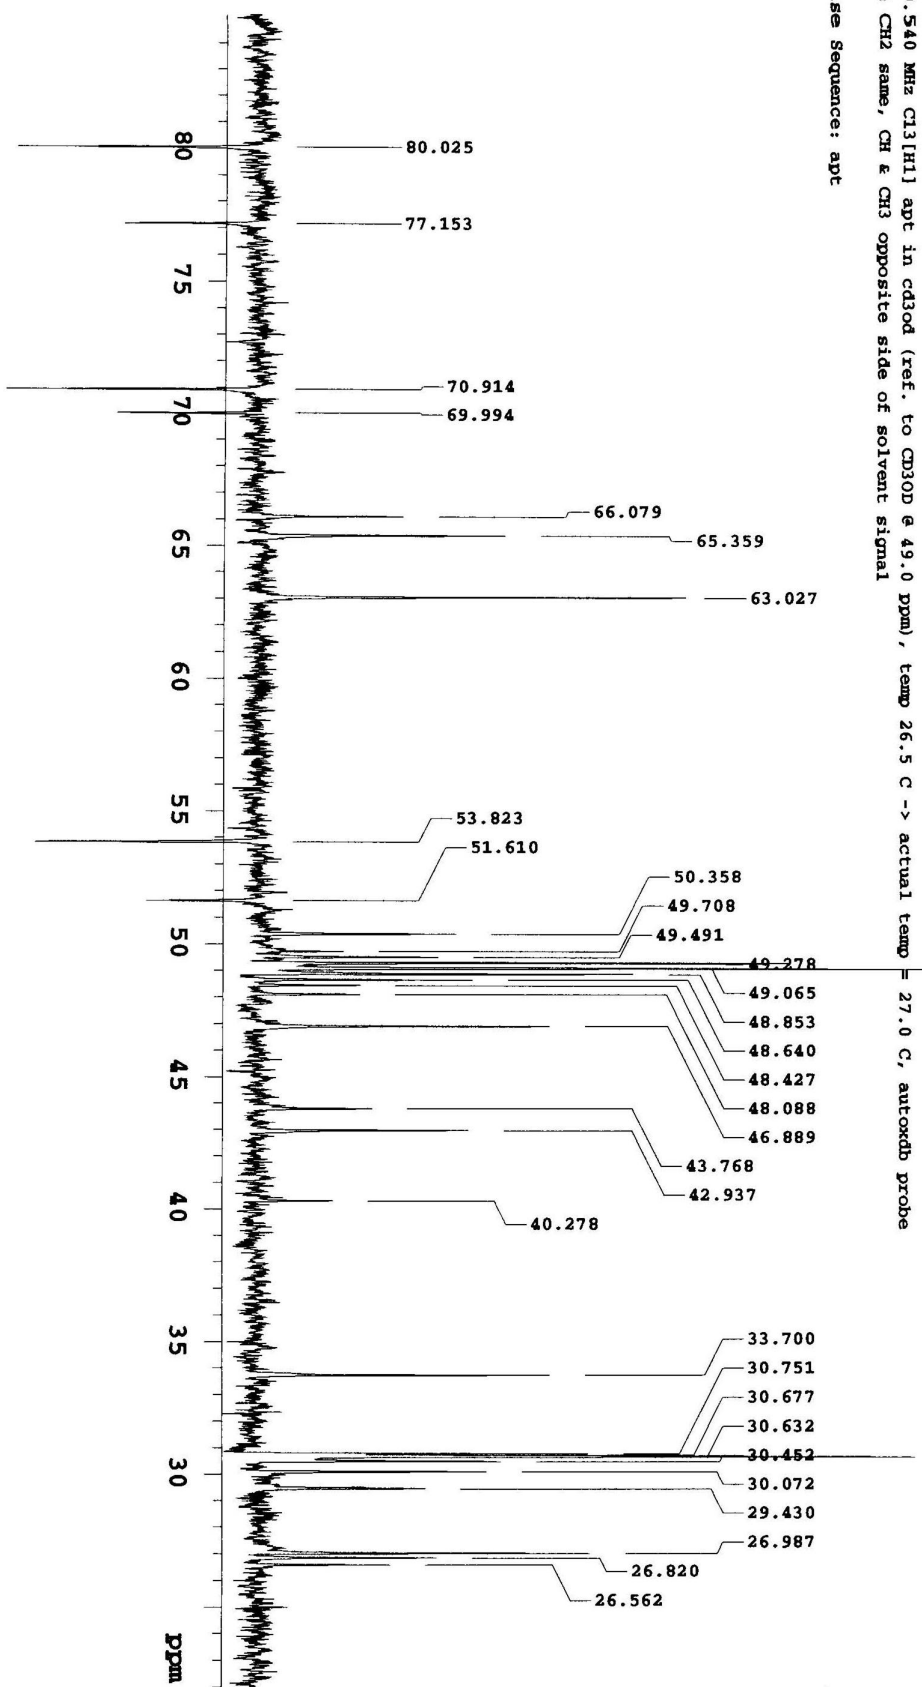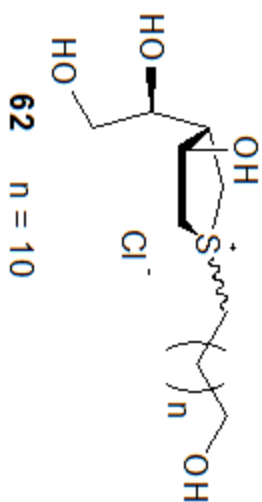

399.796 MHz <sup>1</sup>H 1D in cd3od (ref. to CD3OD @ 3.30 ppm), temp 26.5 C -> actual temp = 27.0 C, autograd probe  
Pulse Sequence: zgpg30

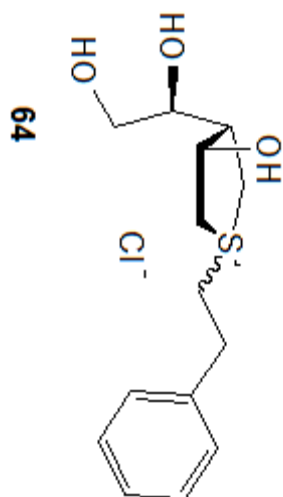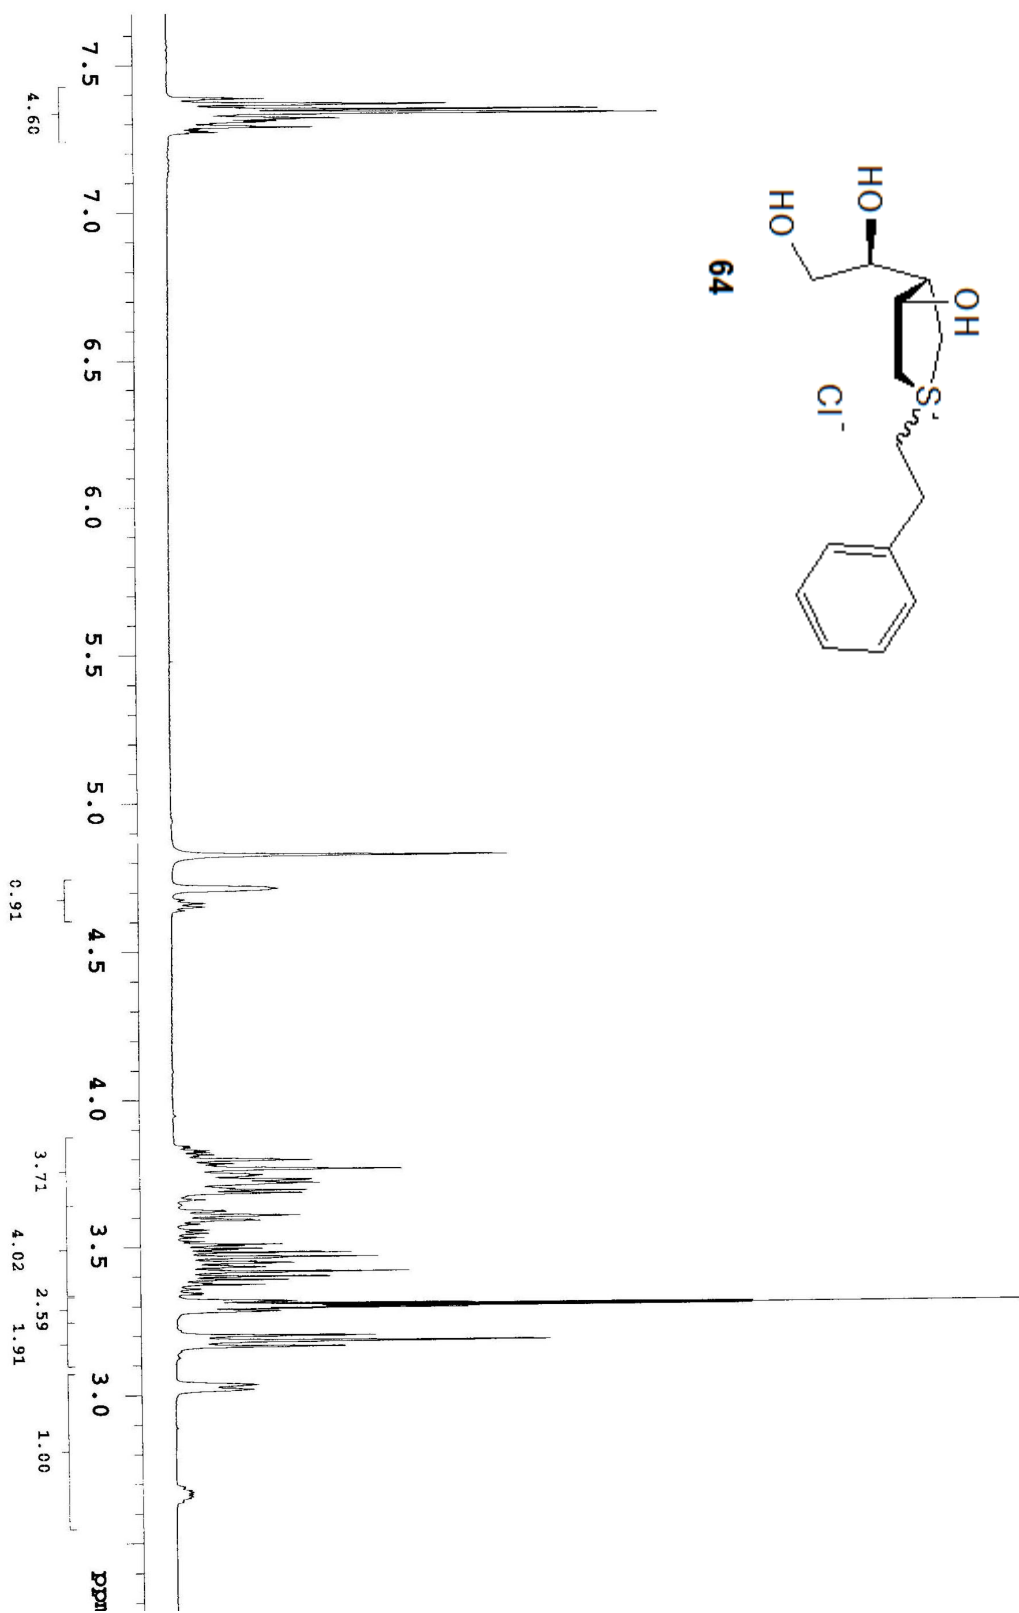

125.266 MHz  $^{13}\text{C}\{^1\text{H}\}$  apt in  $\text{cdCl}_3$  (ref. to  $\text{CDCl}_3$  @ 77.06 ppm), temp 27.2 C -> actual temp = 27.0 C, autordb probe  
C & CH2 same, CH & CH3 opposite side of solvent signal

Pulse Sequence: apt

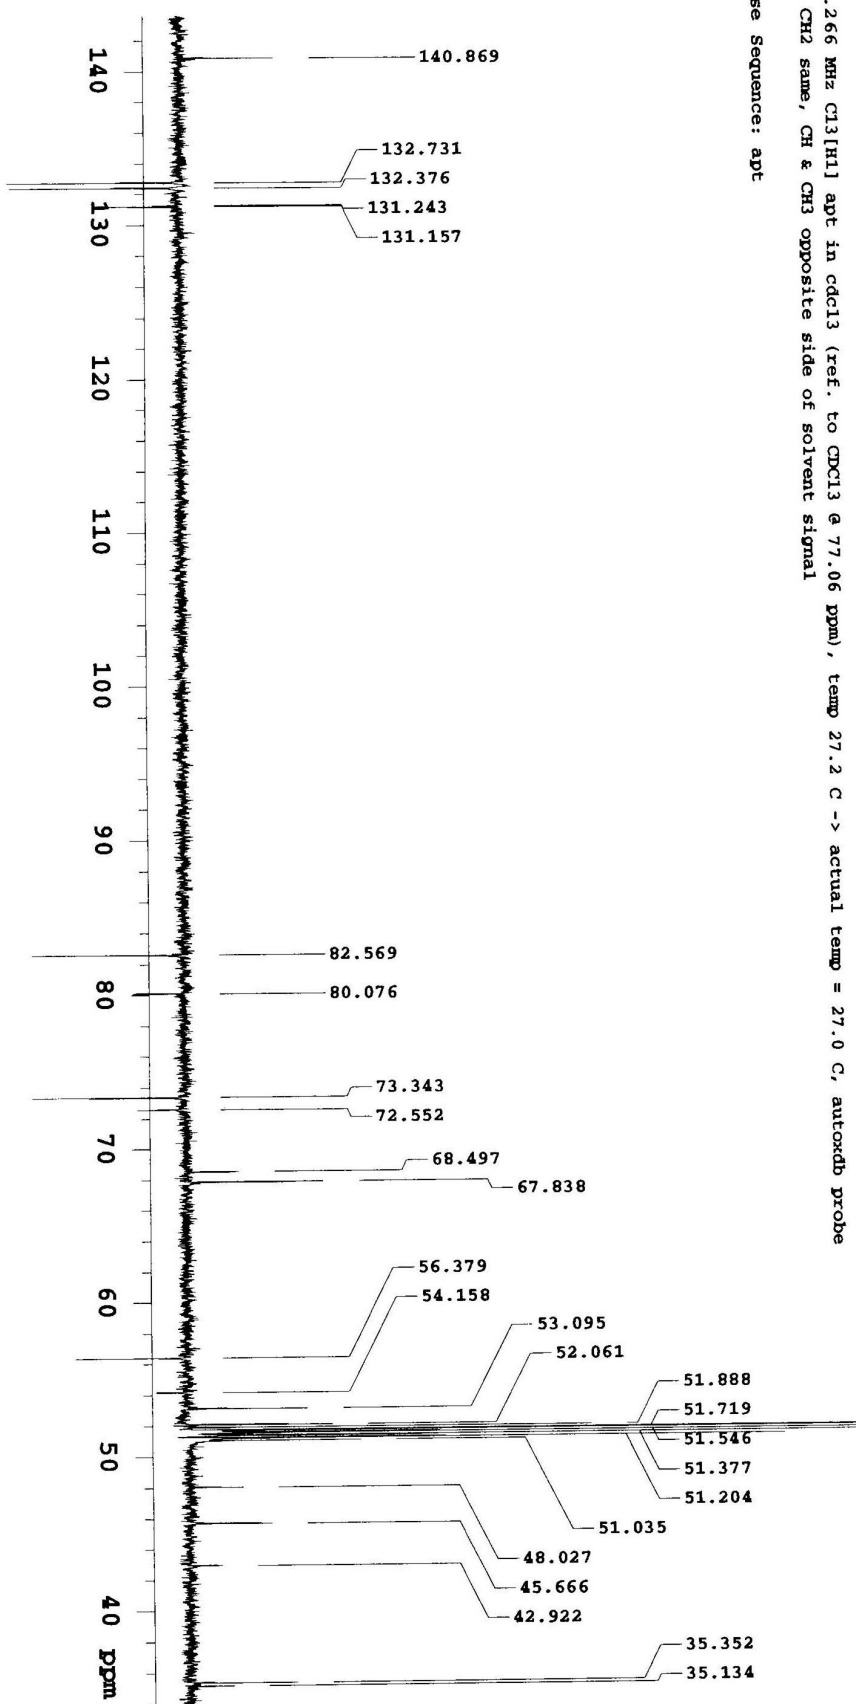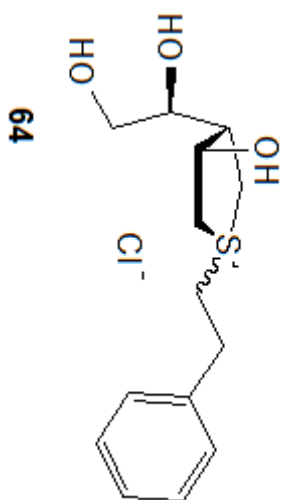

64

399.796 MHz <sup>1</sup>H 1D in cd3od (ref. to CD3OD @ 3.30 ppm), temp 26.5 C -> actual temp = 27.0 C, autoxch probe  
Pulse Sequence: s2pul1

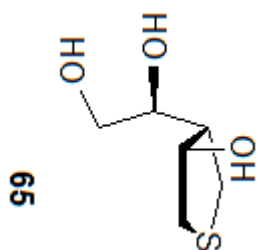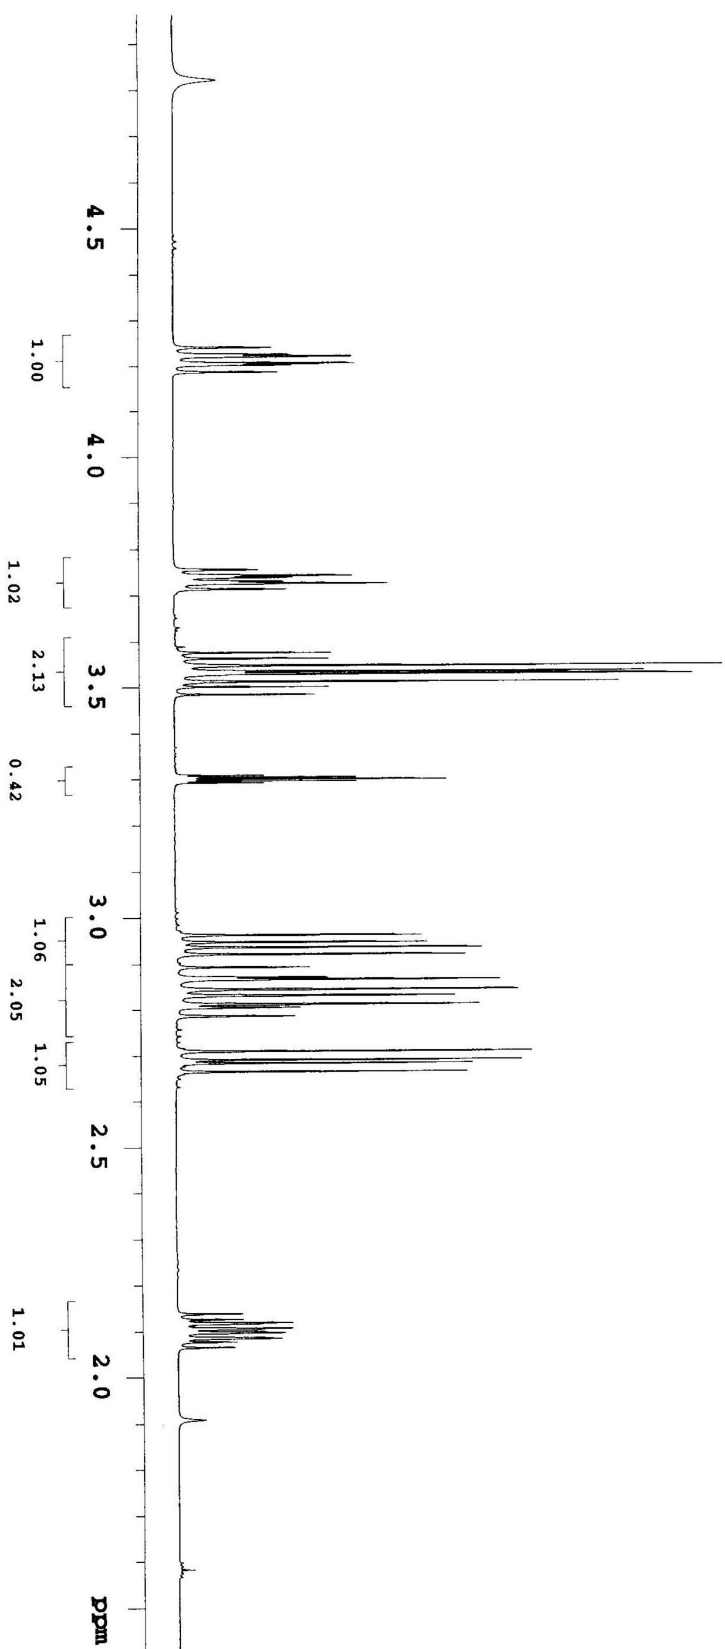



100.540 MHz  $^{13}\text{C}\{^1\text{H}\}$  apt in  $\text{cd}_3\text{od}$  (ref. to  $\text{CD}_3\text{OD}$  @ 49.0 ppm), temp 26.5 C -> actual temp = 27.0 C, autoxchg probe  
 C & CH2 same, CH & CH3 opposite side of solvent signal  
 Pulse Sequence: apt

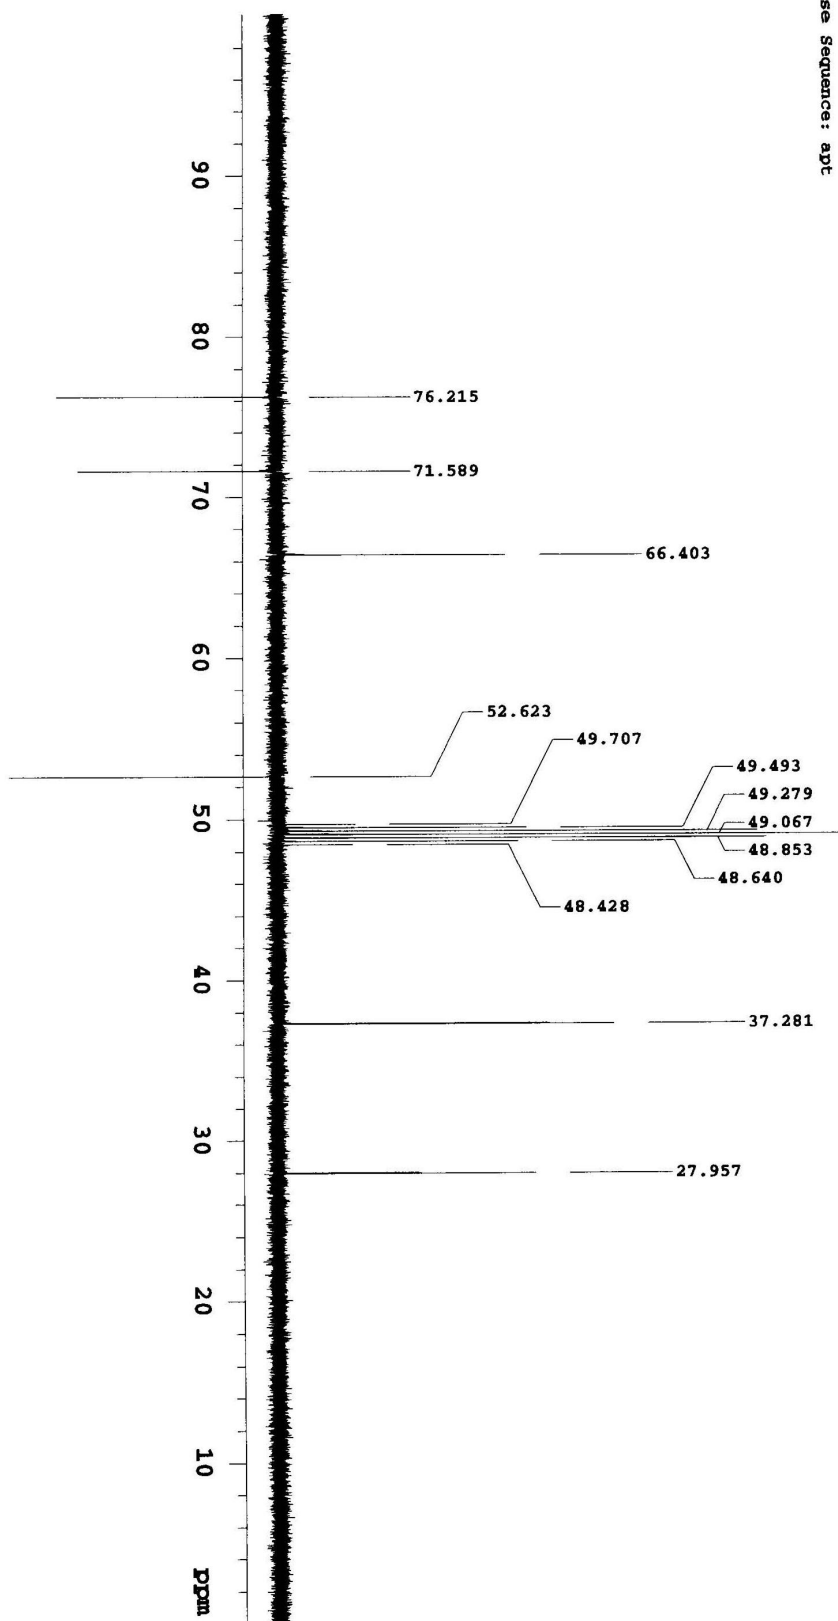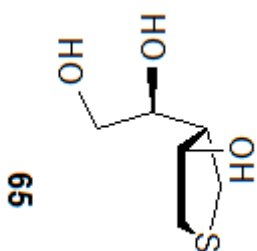

399.796 MHz <sup>1</sup>H 1D in cd3od (ref. to CD3OD @ 3.30 ppm), temp 26.5 C -> actual temp = 27.0 C, autordb probe  
Pulse Sequence: s2pul1

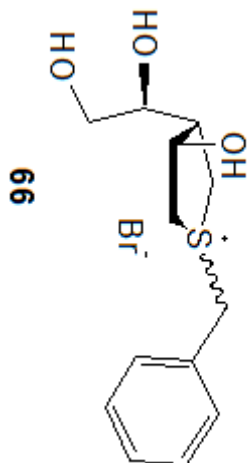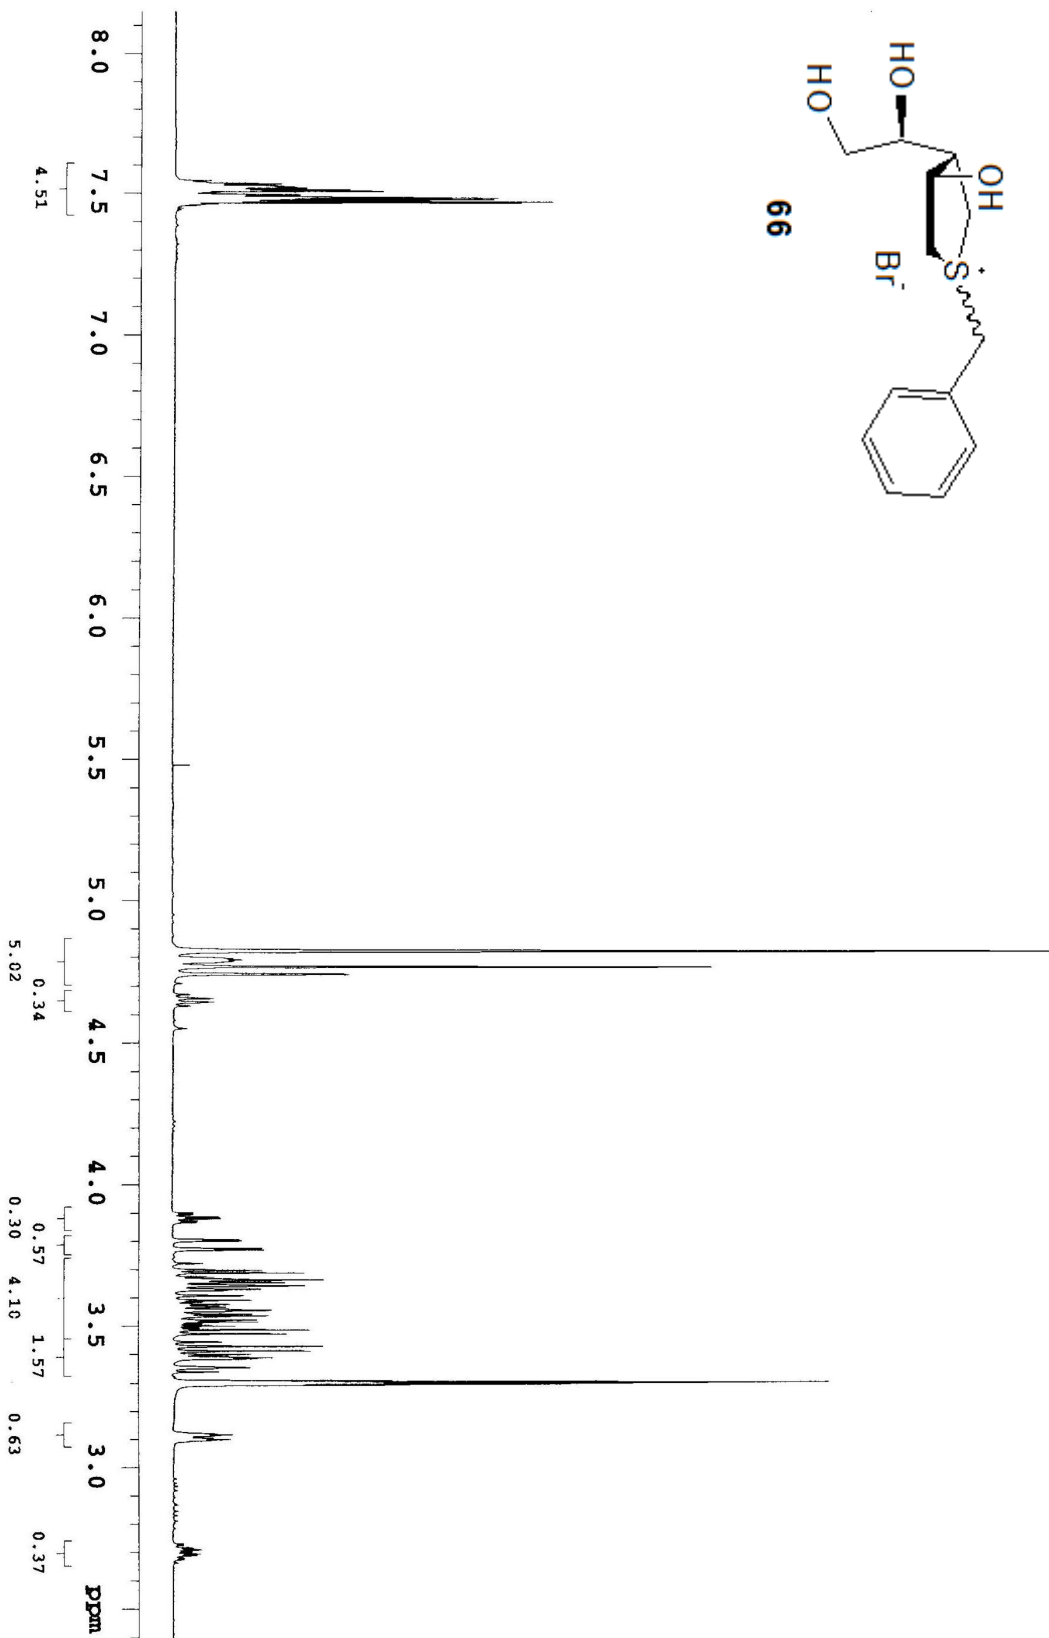

100.540 MHz  $^{13}\text{C}\{^1\text{H}\}$  apt in  $\text{cd}_3\text{od}$  (ref. to  $\text{CD}_3\text{OD}$  @ 49.0 ppm), temp 26.5 C -> actual temp = 27.0 C, autotxdr probe  
 C &  $\text{CH}_2$  same, CH &  $\text{CH}_3$  opposite side of solvent signal  
 Pulse Sequence: apt

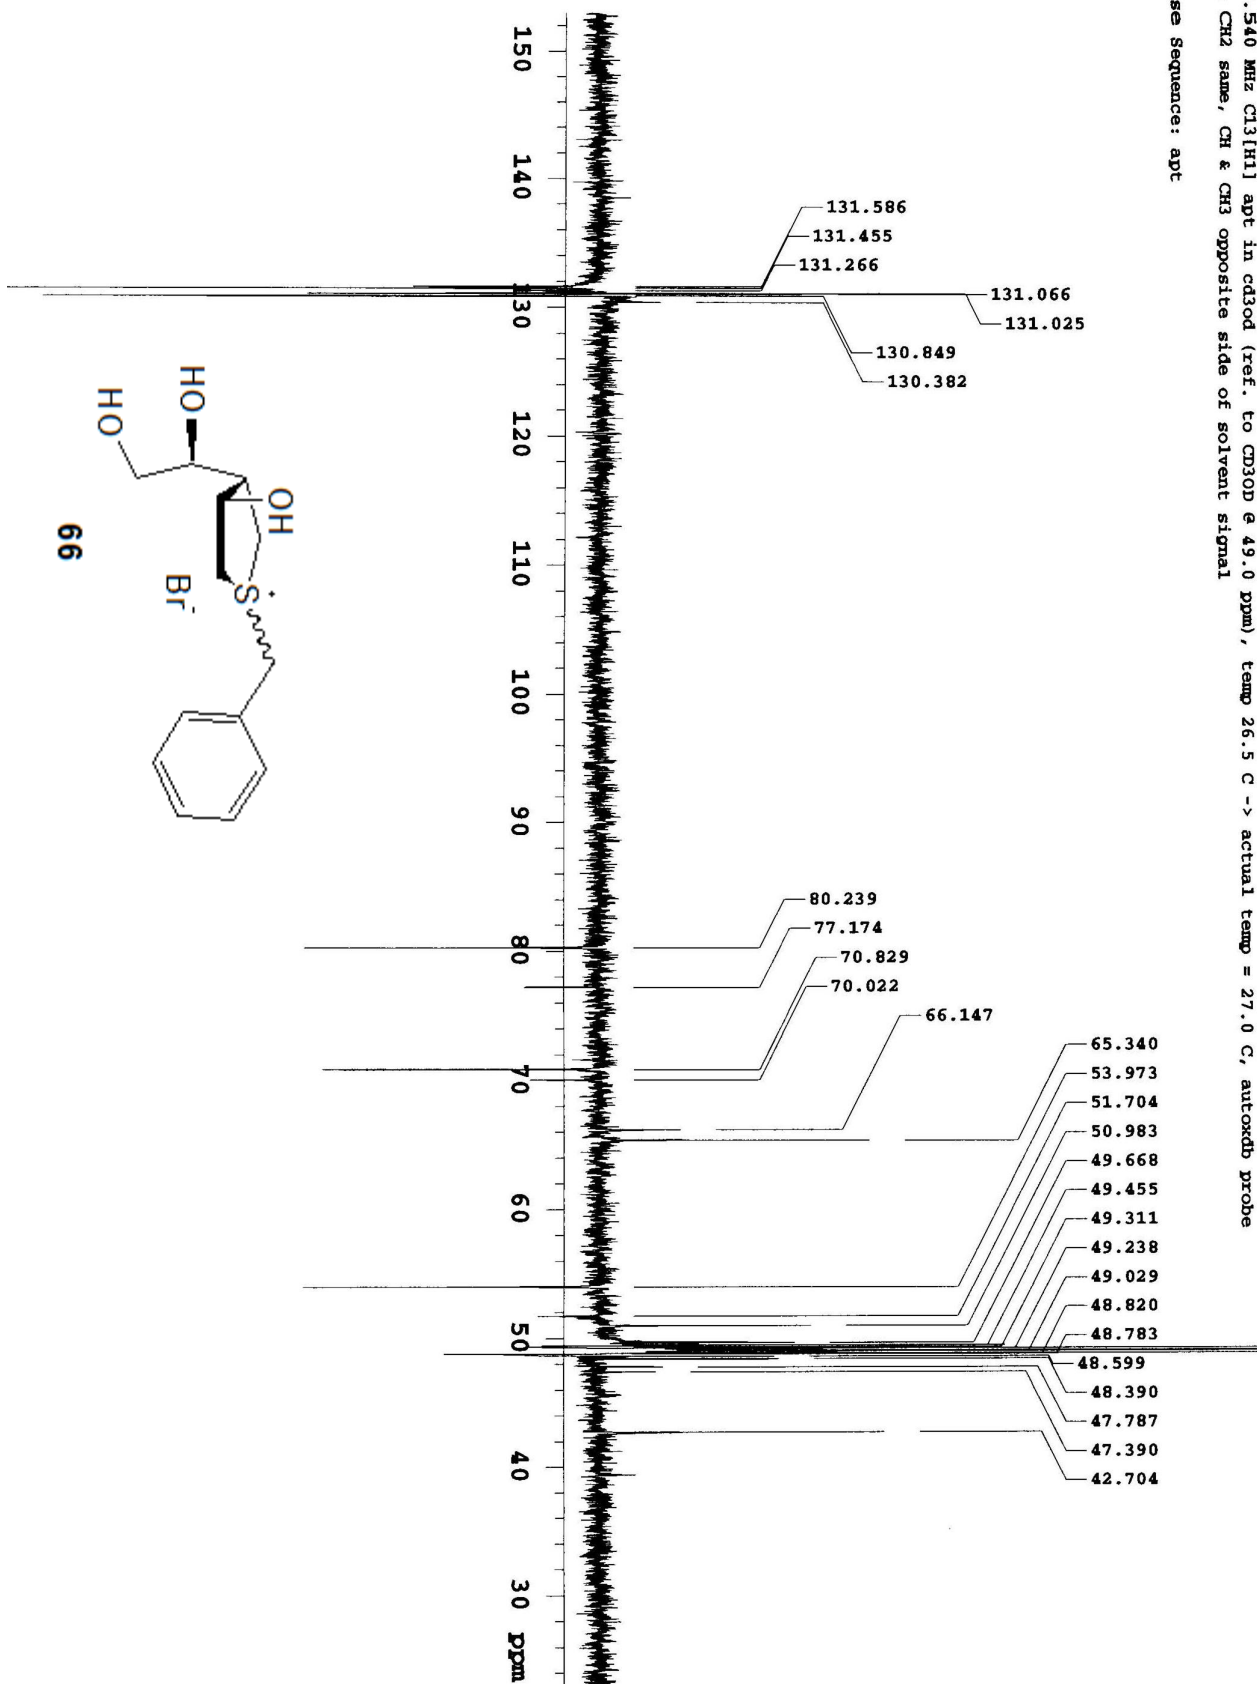

498.124 MHz H1 1D in cd3od (ref. to CD3OD @ 3.30 ppm), temp 27.2 C -> actual temp = 27.0 C, autokxhb probe  
Pulse Sequence: s2pul

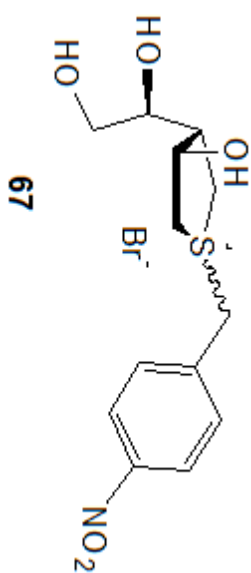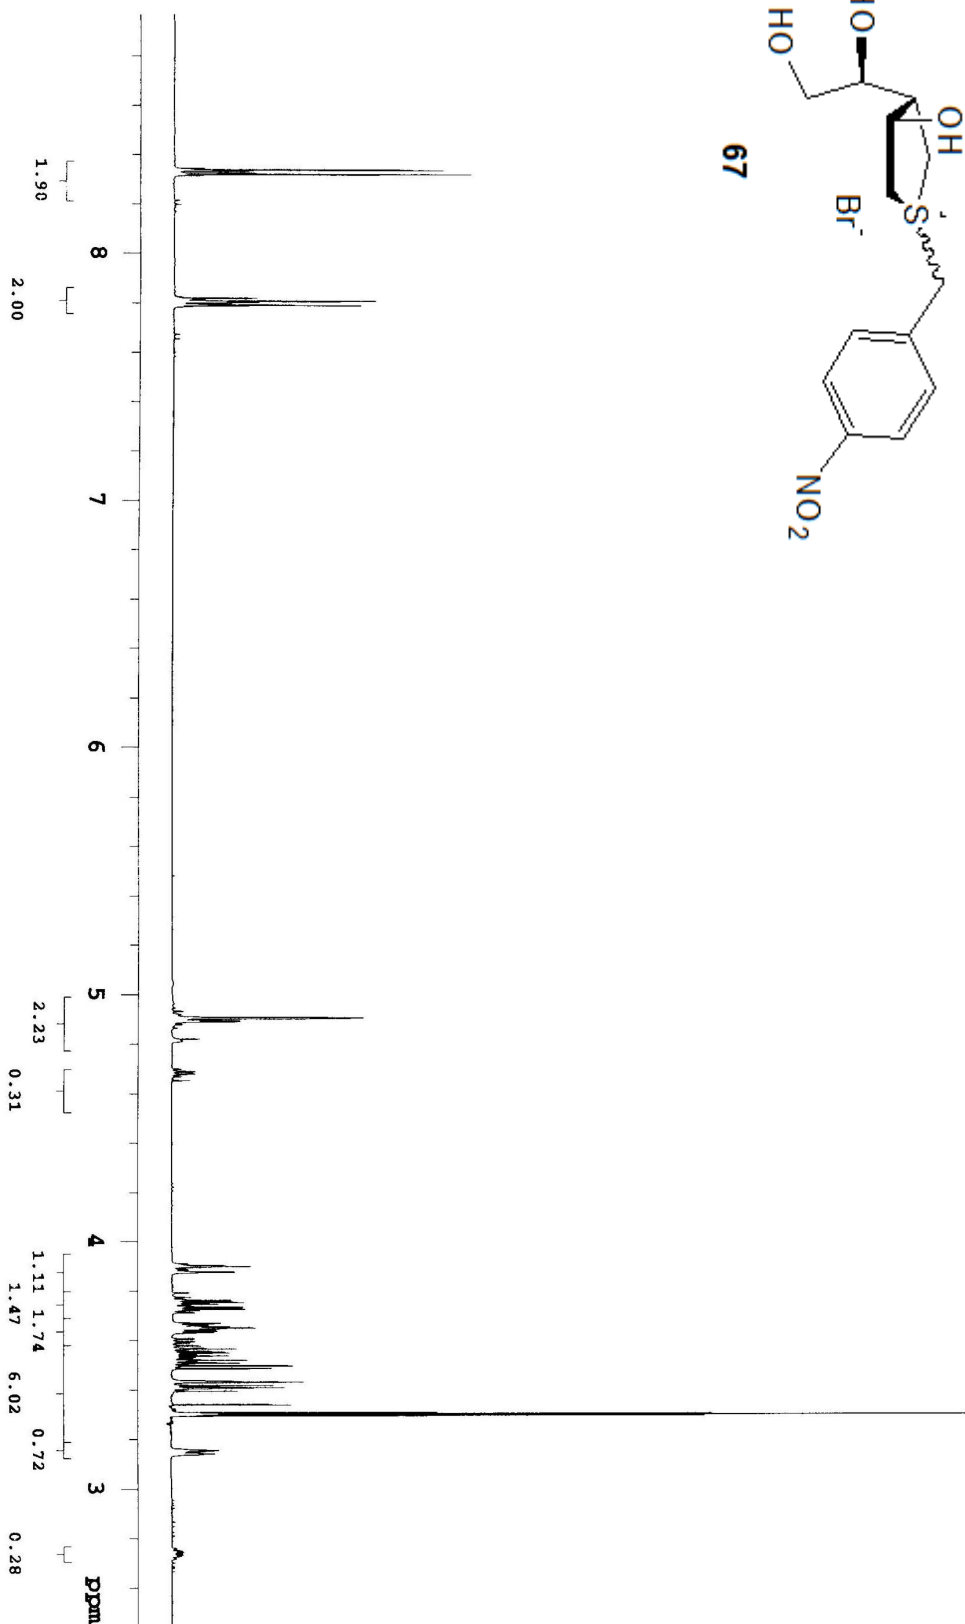

125.267 MHz  $^{13}\text{C}\{^1\text{H}\}$  apt in  $\text{cd}_3\text{od}$  (ref. to  $\text{CD}_3\text{OD}$  @ 49.0 ppm), temp 27.2 C -> actual temp = 27.0 C, autoxgb probe  
 C & CH2 same, CH & CH3 opposite side of solvent signal  
 Pulse Sequence: apt

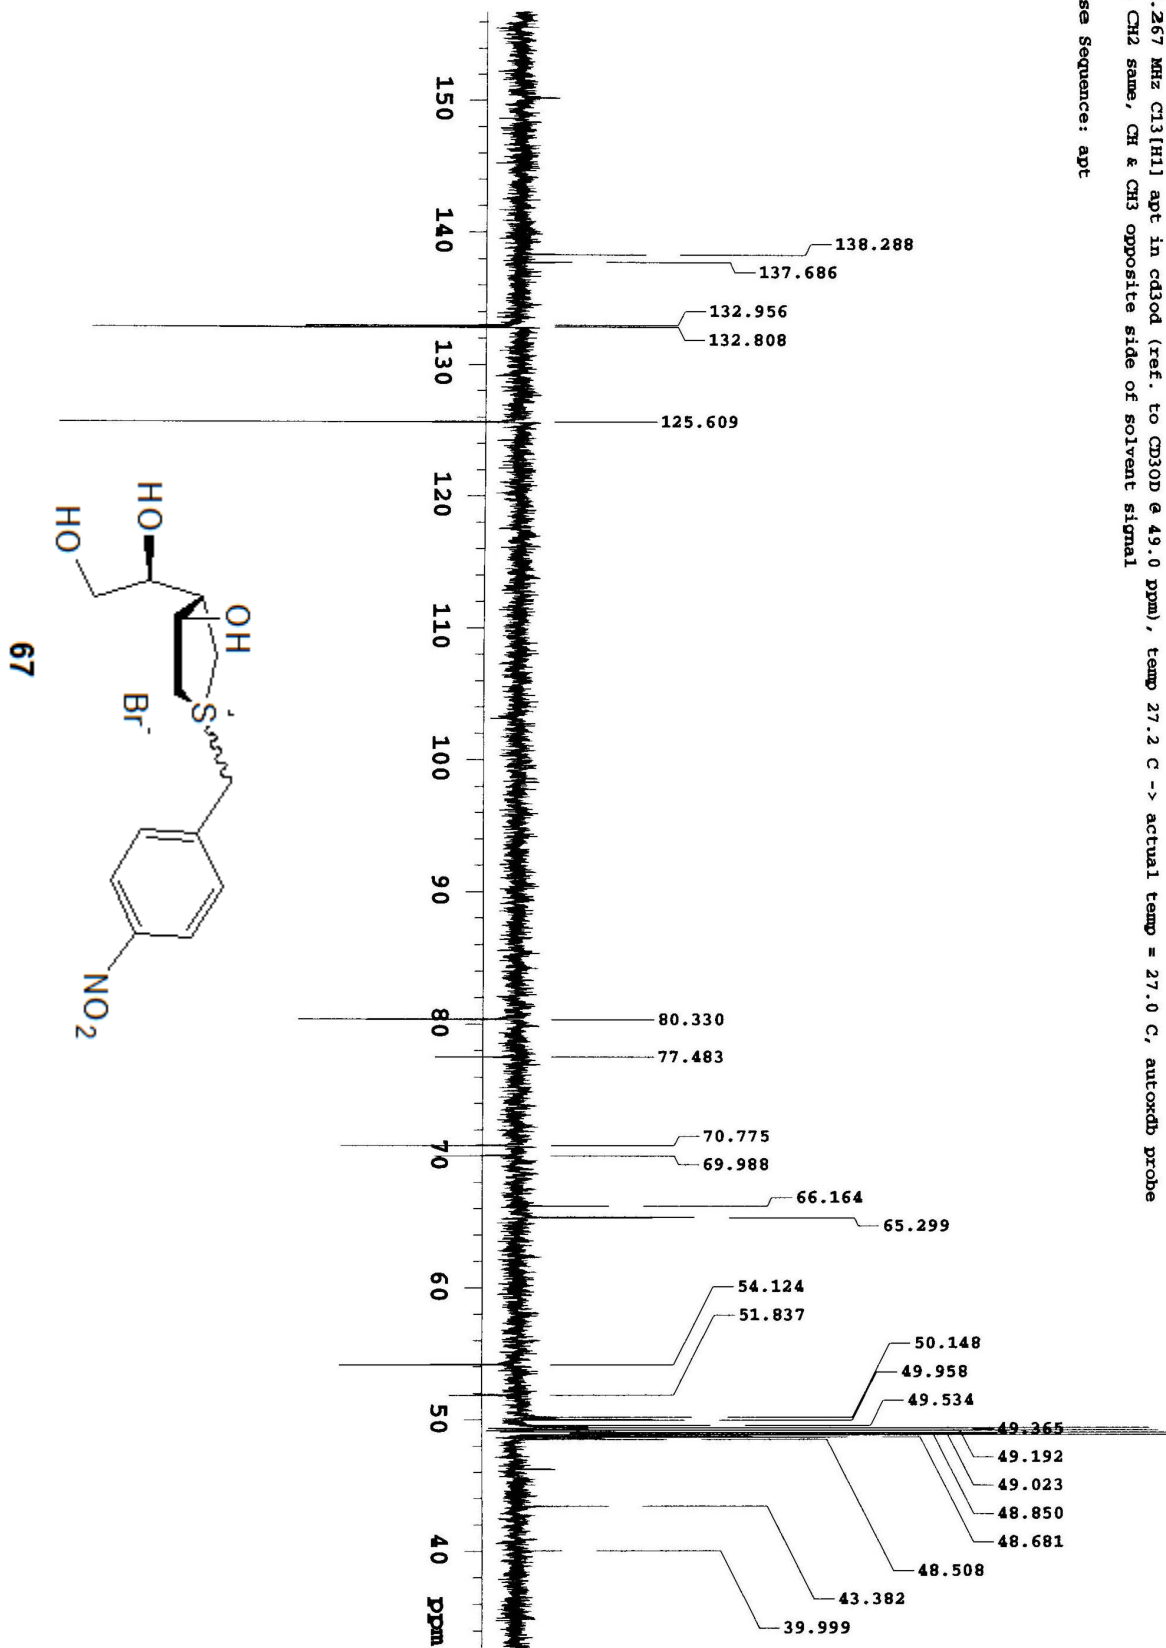

498.124 MHz H1 1D in cd3od (ref. to CD3OD @ 3.30 ppm), temp 27.2 C -> actual temp = 27.0 C, autotxdr probe  
Pulse Sequence: s2pnl

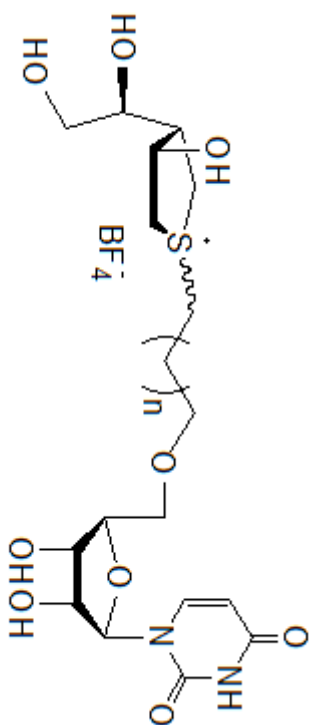

69  $n = 1$

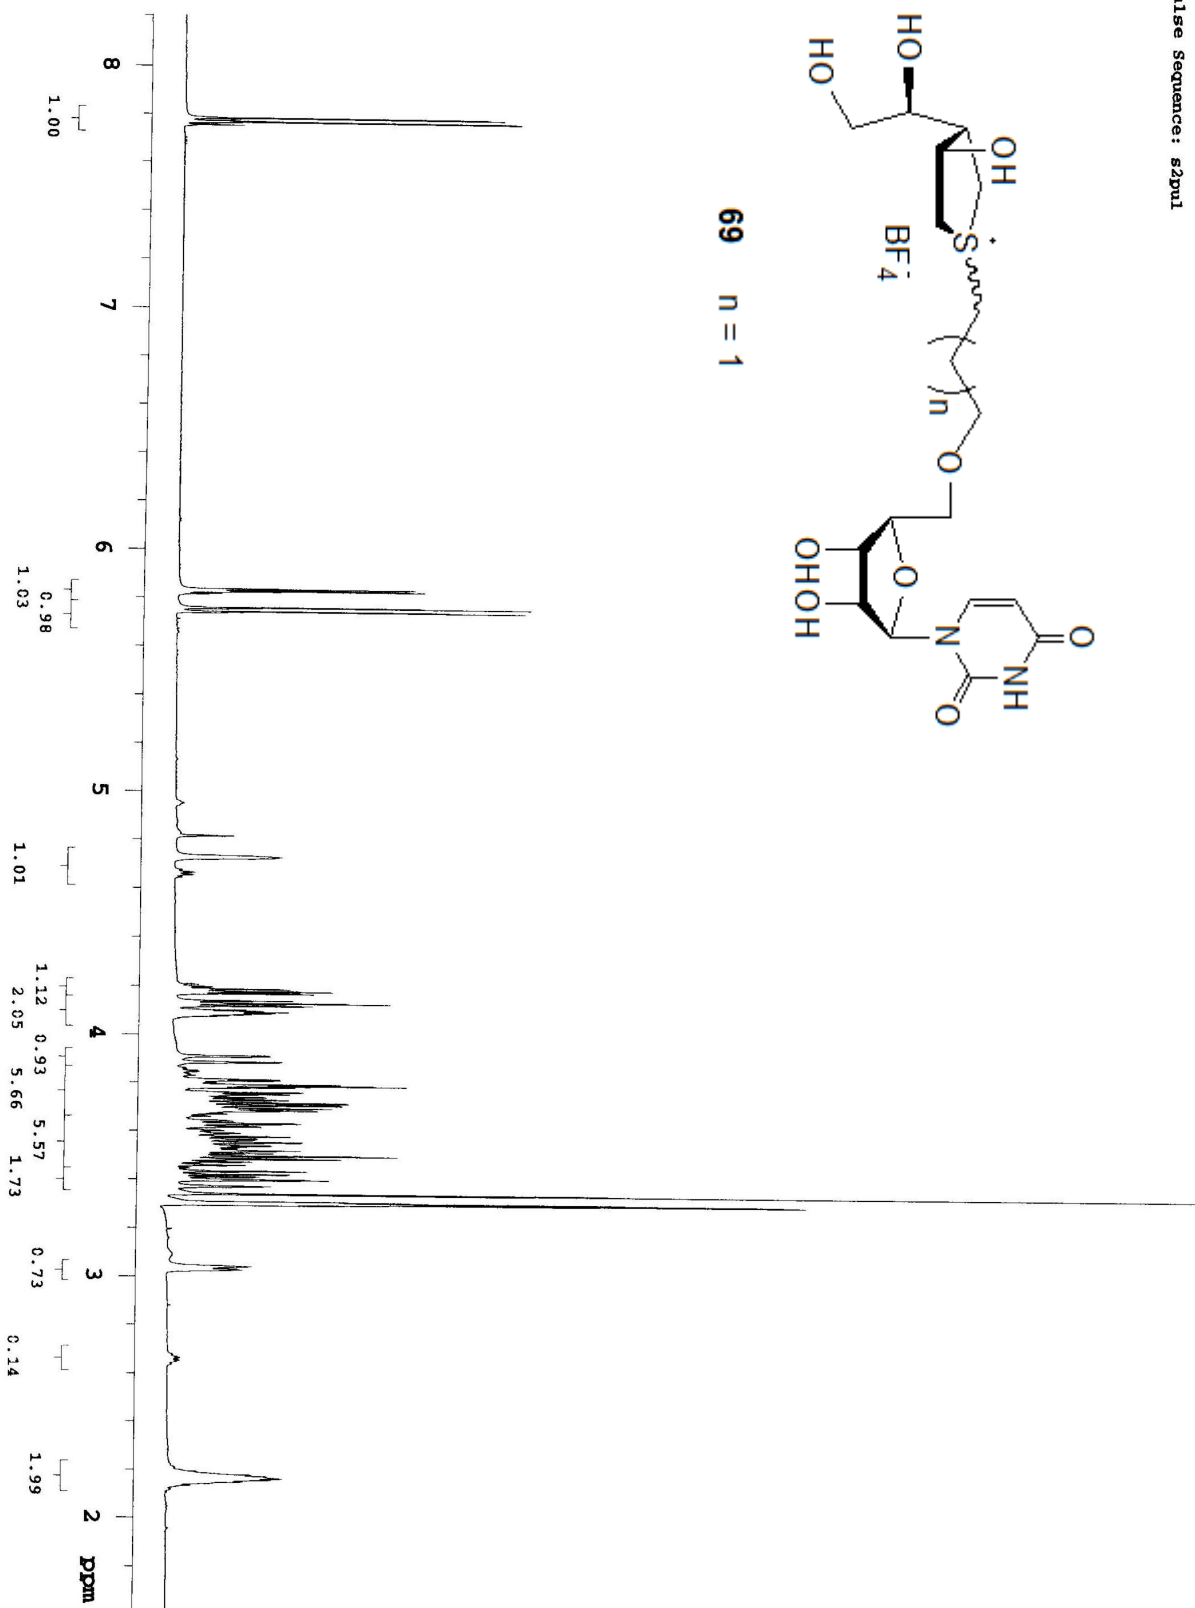

125.267 MHz  $^{13}\text{C}\{^1\text{H}\}$  apt in  $\text{cd}_3\text{od}$  (ref. to  $\text{CD}_3\text{OD}$  @ 49.0 ppm), temp 27.2 C -> actual temp = 27.0 C, autoxgb probe  
Pulse Sequence: apt

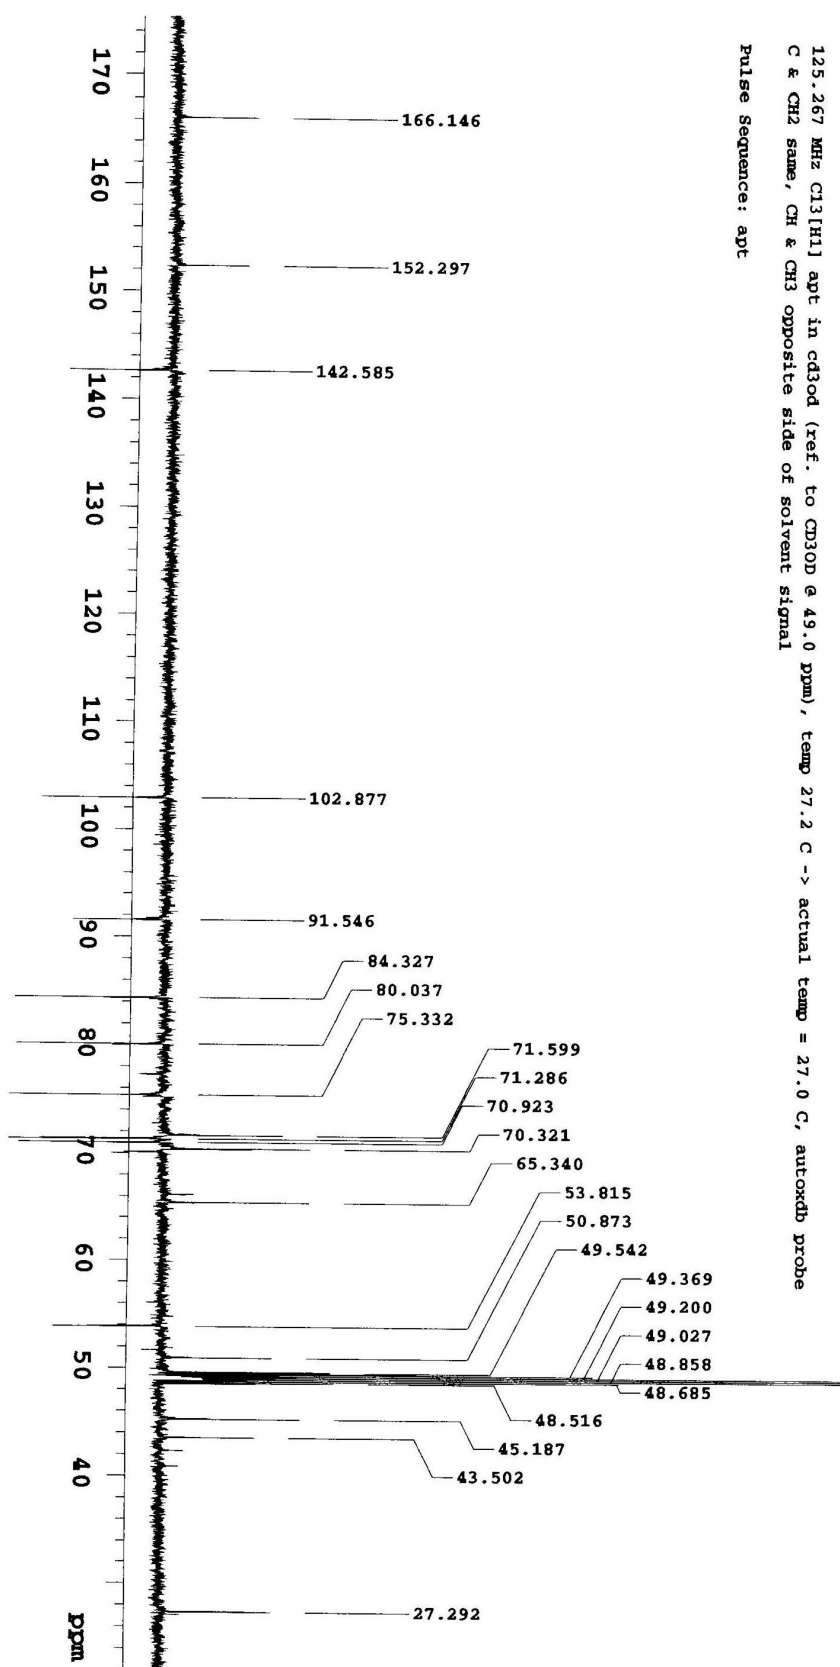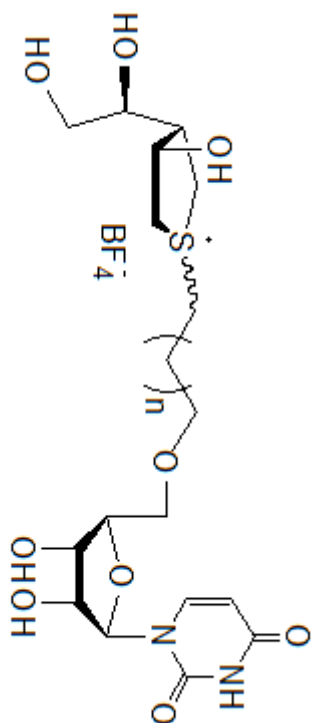

69  $n = 1$

399.796 MHz <sup>1</sup>H 1D in cd3od (ref. to CD3OD @ 3.30 ppm), temp 26.5 C -> actual temp = 27.0 C, autokdb probe  
Pulse Sequence: szpul

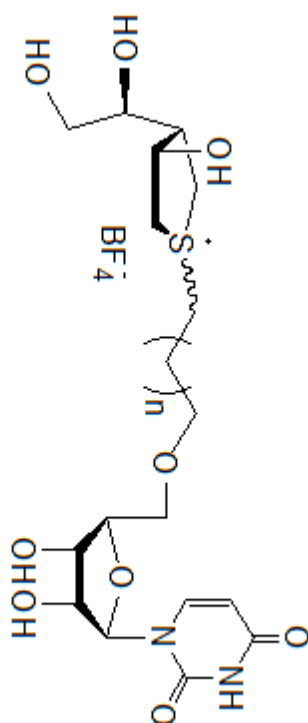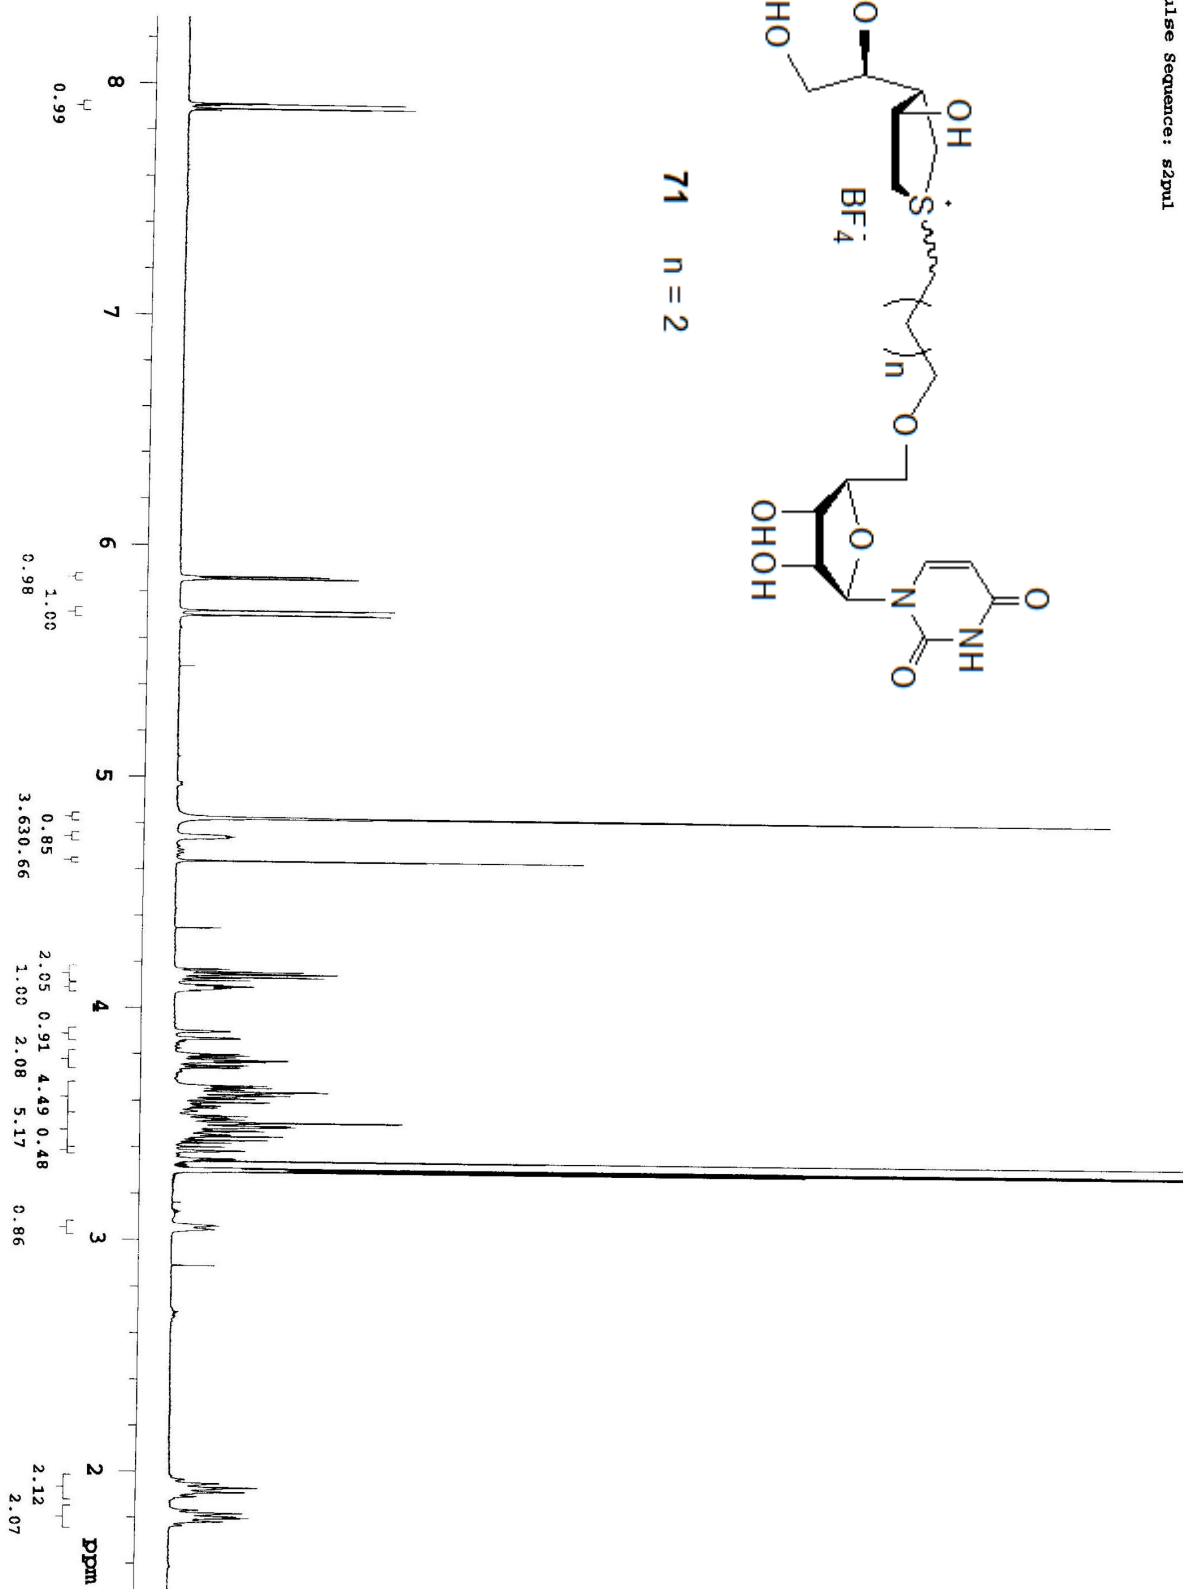



100.540 MHz  $^{13}\text{C}$  [H1] apt in  $\text{cd}_3\text{od}$  (ref. to  $\text{CD}_3\text{OD}$  @ 49.0 ppm), temp 26.5 C -> actual temp = 27.0 C, autokdb probe  
 C & CH2 same, CH & CH3 opposite side of solvent signal  
 Pulse Sequence: apt

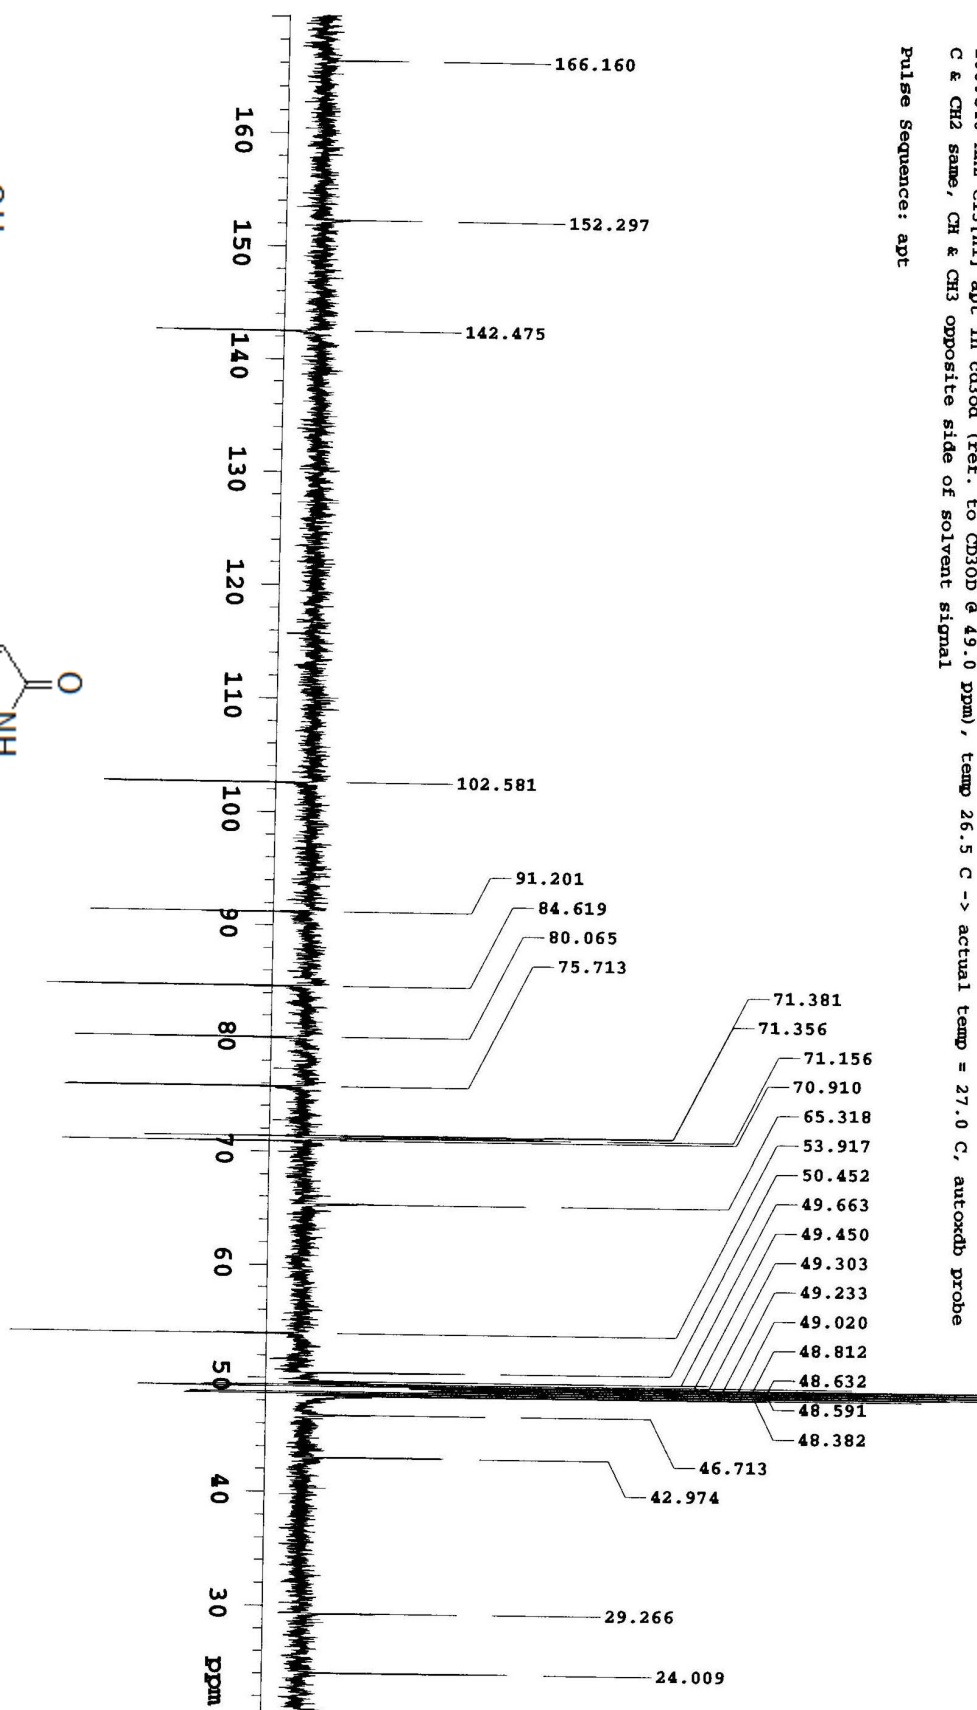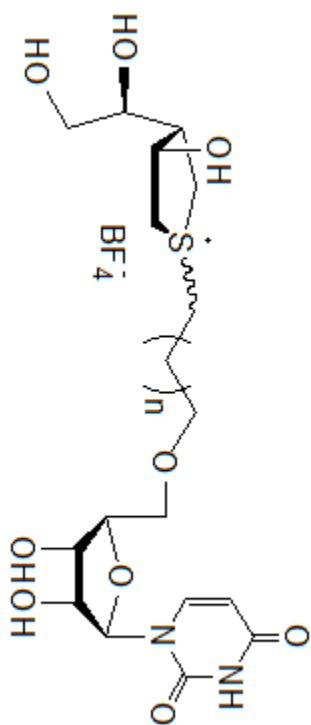

71 n = 2
